# Supplementary material
Source: publisher figshare collection journal article supplement (https://acs.figshare.com/ndownloader/files/17384462)

## Supporting Information

### Visible-Light Photoredox Catalyzed Decarboxylative Alkylation of Heteroarenes Using Carboxylic Acids with Hydrogen Release

Wan-Fa Tian<sup>†,‡,§</sup>, Chun-Hong Hu<sup>†,§</sup>, Ke-Han He<sup>†</sup>, Xiao-Ya He<sup>†</sup> and Yang Li<sup>\*,†</sup>

<sup>†</sup>Center for Organic Chemistry, Frontier Institute of Science and Technology and State Key Laboratory for Mechanical Behavior of Materials, Xi'an Jiaotong University, Xi'an, Shaanxi, 710054, P. R. China

<sup>‡</sup>Institute of Organic Chemistry, Jiangxi Science & Technology Normal University, Key Laboratory of Organic Chemistry, Nanchang, Jiangxi, 330013, P. R. China

<sup>§</sup>W.-F. T. and C.-H. H. contributed equally to this work.

\*E-mail: liyang79@mail.xjtu.edu.cn

#### Table of Contents

|                                                       |     |
|-------------------------------------------------------|-----|
| General information .....                             | S2  |
| General procedure for synthesis of 3 .....            | S3  |
| Table S1. Optimizing reaction conditions of 3af ..... | S6  |
| Table S2. Optimizing reaction conditions of 3ah.....  | S6  |
| GC-MS analysis of the crude products .....            | S7  |
| Scheme S1. Gram-scale reaction.....                   | S8  |
| Characterization data for products.....               | S8  |
| Mechanistic studies .....                             | S19 |
| References .....                                      | S28 |
| Spectrum.....                                         | S29 |

## General Information

The cobalt complexes  $\text{Co}(\text{dmgH})_2\text{PyCl}$ ,<sup>1</sup>  $[\text{Co}(\text{dmgH})_2\text{Py}_2]\text{PF}_6$ ,<sup>1</sup>  $\text{Co}(\text{dmgH})_2(4\text{-NMe}_2\text{Py})\text{Cl}$ <sup>1</sup> and  $\text{Co}(\text{dmgH})_2(4\text{-CONMe}_2\text{Py})\text{Cl}$ <sup>2</sup> were prepared according to the reported procedures. EtOAc and  $\text{CH}_3\text{CN}$  were freshly distilled over  $\text{CaH}_2$ . If no special indicated, other reagents and solvents were used as commercially available without further purification. All the reactions were carried out in reaction tubes on Wattecs Parral Reactor under argon atmosphere. Column chromatographic purification of products was accomplished using 200-300 mesh silica gel.

NMR spectra were measured on a Bruker Avance-400 spectrometer in the solvents indicated; chemical shifts are reported in units (ppm) by assigning TMS resonance in the  $^1\text{H}$  spectrum as 0.00 ppm,  $\text{CDCl}_3$  resonance in the  $^{13}\text{C}$  spectrum as 77.0 ppm.  $^{19}\text{F}$  spectrum was determined relative to  $\text{CFC}_3$  as external standard. Coupling constants are reported in Hz with multiplicities denoted as br (broad), s (singlet), d (doublet), t (triplet), q (quartet) and m (multiplet). Infrared spectra were collected on a Thermo Fisher Nicolet 6700 FT-IR spectrometer using ATR (Attenuated Total Reflectance) method. Absorption maxima ( $\nu_{\text{max}}$ ) are reported in wavenumbers ( $\text{cm}^{-1}$ ). HRMS were performed on Fourier Transform Ion Cyclotron Resonance Mass Spectrometer. Analytical gas chromatography (GC) for liquid phase was carried out on a Thermo Trace 1300 gas chromatograph, equipped with a flame ionization detector and a TR-V1 column ( $0.32\text{ mm} \times 30\text{ m}$ , Film:  $1.8\text{ }\mu\text{m}$ ). Analytical gas chromatography (GC) for gas sample were carried out on a SHIMDZU GC-2014ATF/SPL (TDX-01 60/80 mesh,  $2.0\text{ mm} \times 3.2\text{ mm} \times 2.1\text{ mm}$ -FID, TCD- permanent gases,  $\text{N}_2$  carrier gas). The systems allow for the determination of  $\text{H}_2$ , Ar, CO and  $\text{CO}_2$  within the ranges:  $\text{H}_2 \geq 0.5\text{ vol\%}$  -100 vol%,  $\text{CO} \geq 2\text{ ppm}$ ,  $\text{CO}_2 \geq 100\text{ ppm}$ . UV-vis absorption spectrum, the quantum yield measurement and steady-state emission spectra were recorded using a PerkinElmer Lambda or a HITACHI F-4500 Fluorescence Spectrometer. Cyclic voltammetry experiments were studied On a CHI660E Electrochemical Workstation equipped with the conventional three electrode system under argon atmosphere. The measurements were performed in mixture solvent of  $\text{CH}_3\text{CN}/\text{EtOAc}$  (1:1) containing 0.1 M  $n\text{-Bu}_4\text{PF}_6$  using ferrocene/ferrocenium ( $\text{Fc}^+/\text{Fc}^0$ ) as an internal reference. The working electrode was a glassy carbon disk electrode ( $d = 0.3\text{ cm}$ ). The auxiliary and reference electrode consisted of a Pt tablets and an  $\text{Ag}/\text{AgNO}_3$  (0.1 M in  $\text{CH}_3\text{CN}$ ), respectively. Glassy carbon disk electrode was polished with the  $d = 0.05\text{ micron}$  Alumina powder and a polishing cloth before each measurement.

## General procedure for synthesis of **3**

To a Schlenk tube containing a stirring bar was added Ir[dF(CF<sub>3</sub>)ppy]<sub>2</sub>(dtbbpy)PF<sub>6</sub> (0.002 mmol, 1 mol%), [Co(dmgh)<sub>2</sub>Py<sub>2</sub>]PF<sub>6</sub> (0.006 mmol, 3 mol%), *n*-Bu<sub>4</sub>NOAc (0.06 mmol, 30 mol%) heterocycles **1** (0.20 mmol, 1.0 equiv) and carboxylic acids **2** (0.40 mmol, 2.0 equiv). Then anhydrous EtOAc (1.0 mL) was added to the reaction tube via syringe in glove box. The reaction mixture was stirred for 30 h at Wattecs Parallel Light Reactor (Blue LED Light source, 10 W every position) at ambient temperature (the temperature range from 40 °C to 44 °C). The gas phase was detected for the H<sub>2</sub> and CO<sub>2</sub> yield using methane as an internal standard. It is worth noting that the inaccordance of product yield with H<sub>2</sub> and CO<sub>2</sub> evolution in **3ae–3ah**, **3an** synthesis should be attributed to the decarboxylative elimination of the carboxylic acid substrate.<sup>3</sup> Finally, the solvent was removed in vacuo and the residue was purified by column chromatography on silica gel to afford compounds **3**.

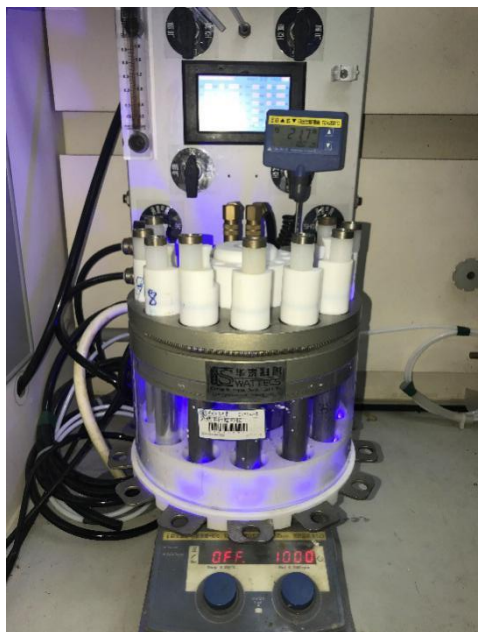

**Wattecs Parallel Light Reactor (Blue LED Light source, 10 W every position)**

### Procedure for drawing the standard-curve for H<sub>2</sub> calculation

Five standard Schlenk tubes were filled with Ar. Then, CH<sub>4</sub> (0.5 mL) was injected to each tubes as internal standard. After that, H<sub>2</sub> (4.50 mL, 3.60 mL, 2.70 mL, 1.80 mL, 0.90 mL) was injected to each tube respectively. These amounts of H<sub>2</sub> were corresponding to H<sub>2</sub> yields (100%, 80%, 60%, 40% and 20%, respectively) in standard reaction. These tubes were kept for 3 h to make the gas mix uniformly. Afterwards, these samples were detected by GC. The standard-curve was made by the different values of Area (H<sub>2</sub>)/Area (CH<sub>4</sub>) with the corresponding H<sub>2</sub> yields. Meanwhile, the standard-curve for CO<sub>2</sub> calculation was made by the same method.

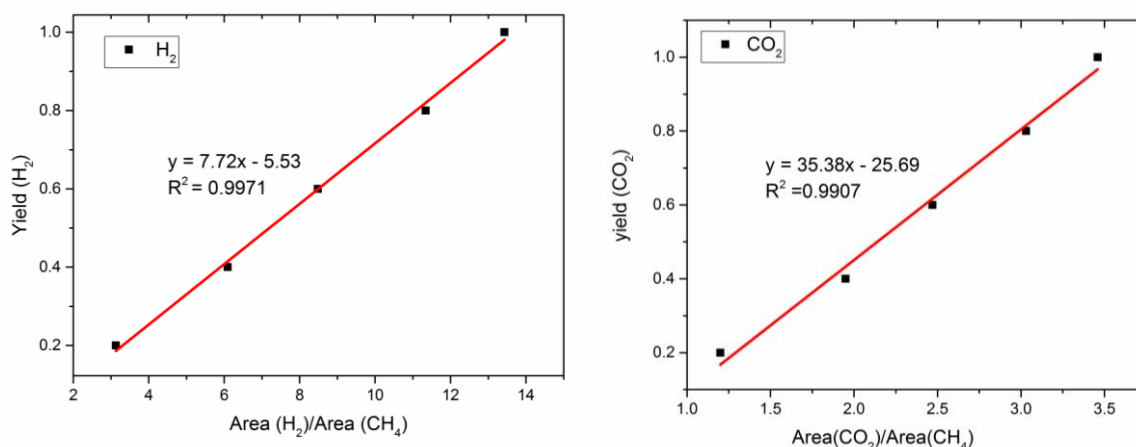

## The standard-curve for the calculation of H<sub>2</sub> and CO<sub>2</sub> yield using CH<sub>4</sub> as an internal standard

### Detecting the accuracy of the standard-curve:

In order to detect the accuracy of the standard-curve for the calculation of H<sub>2</sub>, three groups of parallel tests were conducted. One group of parallel test was conducted as below. Three standard Schlenk tubes were filled with Ar. Then, CH<sub>4</sub> (0.5 mL) was injected to each tubes as internal standard. After that, H<sub>2</sub> (1.35 mL) was injected to each tube respectively. These amounts of H<sub>2</sub> were corresponding to H<sub>2</sub> yields (30%) in standard reaction. These tubes were kept for 3 h to make the gas mix uniformly. Afterwards, these samples were detected by GC. Then put different values of Area (H<sub>2</sub>)/Area (CH<sub>4</sub>) to the standard-curve and different yields were obtained (results was shown in measurement 1, 2 and 3 in the below table). Other groups were detected using similar operations. The accuracy of CO<sub>2</sub> plot was demonstrated with similar strategy.

As shown in the below table, every parallel tests exhibited the similar results and the relative errors of every parallel tests are not greater than 2.3% and 3.3% for H<sub>2</sub> and CO<sub>2</sub>, respectively. The ranges of parallel tests are not greater than 1% and 2% for the yields of H<sub>2</sub> and CO<sub>2</sub>

| H <sub>2</sub> : $y = 7.72x - 5.53$ , $R^2 = 0.9971$ |       |       |       | CO <sub>2</sub> : $y = 35.38x - 25.69$ , $R^2 = 0.9907$ |      |      |      |
|------------------------------------------------------|-------|-------|-------|---------------------------------------------------------|------|------|------|
| standard yield                                       | 30%   | 60%   | 90%   | standard yield                                          | 30%  | 60%  | 90%  |
| measurement 1                                        | 31%   | 60%   | 91%   | measurement 1                                           | 29%  | 58%  | 88%  |
| measurement 2                                        | 30%   | 59%   | 91%   | measurement 2                                           | 31%  | 60%  | 89%  |
| measurement 3                                        | 31%   | 60%   | 90%   | measurement 3                                           | 30%  | 59%  | 90%  |
| mean                                                 | 30.7% | 59.7% | 90.7% | mean                                                    | 30%  | 59%  | 89%  |
| range (max-min)<br>yield                             | 1%    | 1%    | 1%    | range (max-min)<br>yield                                | 2%   | 2%   | 2%   |
| relative error <sup>a</sup>                          | 2.3%  | 1.2%  | 0.8%  | relative error <sup>a</sup>                             | 3.3% | 1.7% | 1.1% |

<sup>a</sup>the relative largest measurement - mean/mean.

## GC spectrum of the H<sub>2</sub> and CO<sub>2</sub> yield under optimized conditions

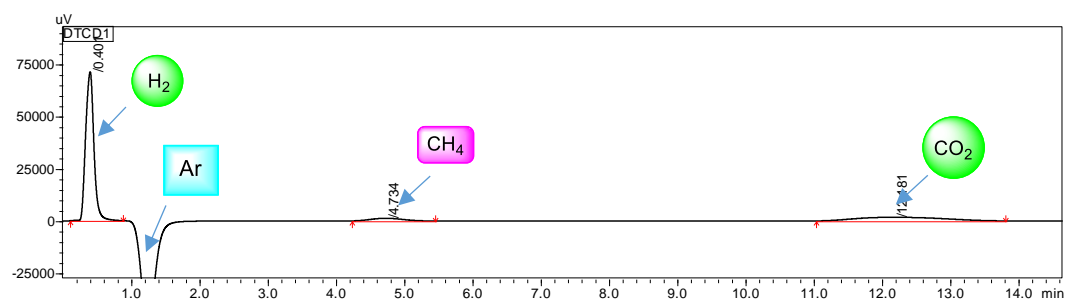

Area (H<sub>2</sub>): 644594; Area (CO<sub>2</sub>): 182018; Area (CH<sub>4</sub>): 49927.

$$y = 7.72 * [\text{Area (H}_2\text{)}/\text{Area (CH}_4\text{)}] - 5.53 = 94\%$$

$$y = 35.38 * [\text{Area (CO}_2\text{)}/\text{Area (CH}_4\text{)}] - 25.69 = 103\%$$

**Table S1. Optimizing the reaction conditions of 3af.**

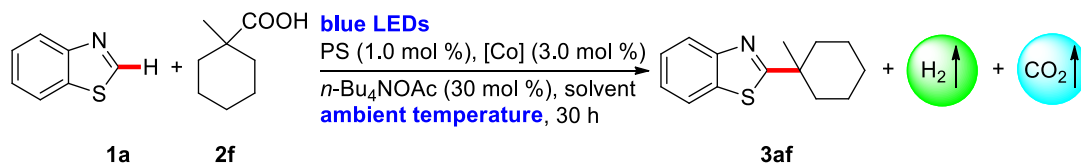

| entry <sup>a</sup> | photosensitizer (PS)                            | [Co]                                                            | solvent        | H <sub>2</sub> (%) | CO <sub>2</sub> (%) | <b>3af</b> (%) |
|--------------------|-------------------------------------------------|-----------------------------------------------------------------|----------------|--------------------|---------------------|----------------|
| 1                  | Ir[dF(CF <sub>3</sub> )ppy] <sub>2</sub> dtbbpy | [Co(dmgh) <sub>2</sub> Py <sub>2</sub> ]PF <sub>6</sub>         | EtOAc          | 106                | 118                 | 22             |
| 2                  | Ir[dF(CF <sub>3</sub> )ppy] <sub>2</sub> dtbbpy | Co(dmgh) <sub>2</sub> (4-CO <sub>2</sub> NMe <sub>2</sub> Py)Cl | EtOAc          | 93                 | 85                  | 22             |
| 3                  | Ir[dF(CF <sub>3</sub> )ppy] <sub>2</sub> dtbbpy | Co(dmgh) <sub>2</sub> PyCl                                      | EtOAc          | 122                | 105                 | 28             |
| 4                  | Ir[dF(CF <sub>3</sub> )ppy] <sub>2</sub> dtbbpy | Co(dmgh) <sub>2</sub> (4-NMe <sub>2</sub> Py)Cl                 | EtOAc          | 59                 | 72                  | 38             |
| 5                  | Ir[dF(CF <sub>3</sub> )ppy] <sub>2</sub> dtbbpy | Co(dmgh) <sub>2</sub> (4-NMe <sub>2</sub> Py)Cl                 | MeOH           | ND                 | ND                  | ND             |
| 6                  | Ir[dF(CF <sub>3</sub> )ppy] <sub>2</sub> dtbbpy | Co(dmgh) <sub>2</sub> (4-NMe <sub>2</sub> Py)Cl                 | EtOH           | ND                 | ND                  | ND             |
| 7                  | Ir[dF(CF <sub>3</sub> )ppy] <sub>2</sub> dtbbpy | Co(dmgh) <sub>2</sub> (4-NMe <sub>2</sub> Py)Cl                 | <i>t</i> -AmOH | 47                 | 68                  | <5             |
| 8                  | Ir[dF(CF <sub>3</sub> )ppy] <sub>2</sub> dtbbpy | Co(dmgh) <sub>2</sub> (4-NMe <sub>2</sub> Py)Cl                 | <i>i</i> -PrOH | 102                | 112                 | 42 (42)        |
| 9                  | Ir[dF(CF <sub>3</sub> )ppy] <sub>2</sub> dtbbpy | Co(dmgh) <sub>2</sub> (4-NMe <sub>2</sub> Py)Cl                 | DME            | 72                 | 95                  | <5             |

<sup>a</sup> Reaction conditions: **1a** (0.20 mmol), **2f** (0.40 mmol), solvent (1.0 mL), PS (1.0 mol %), [Co] (3.0 mol %), irradiation with blue LEDs for 30 h. ND = no detected, <sup>1</sup>H NMR yield was reported using Cl<sub>2</sub>CHCHCl<sub>2</sub> as internal standard.

**Table S2. Optimizing the reaction conditions of 3ah.**

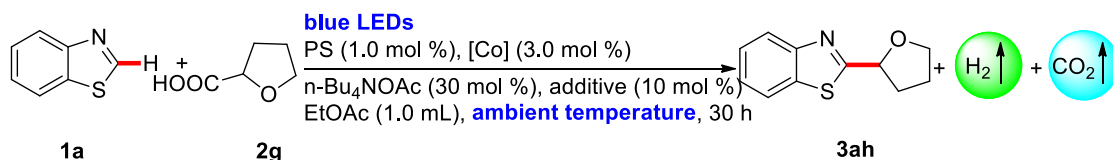

| entry <sup>a</sup> | photosensitizer (PS)                            | [Co]                                                            | additive                             | H <sub>2</sub> (%) | CO <sub>2</sub> (%) | <b>3ah</b> (%) |
|--------------------|-------------------------------------------------|-----------------------------------------------------------------|--------------------------------------|--------------------|---------------------|----------------|
| 1                  | Ir[dF(CF <sub>3</sub> )ppy] <sub>2</sub> dtbbpy | [Co(dmgh) <sub>2</sub> Py <sub>2</sub> ]PF <sub>6</sub>         | —                                    | 60                 | 73                  | 34             |
| 2                  | Ir[dF(CF <sub>3</sub> )ppy] <sub>2</sub> dtbbpy | Co(dmgh) <sub>2</sub> (4-CO <sub>2</sub> NMe <sub>2</sub> Py)Cl | —                                    | 71                 | 79                  | 41             |
| 3                  | Ir[dF(CF <sub>3</sub> )ppy] <sub>2</sub> dtbbpy | Co(dmgh) <sub>2</sub> (4-NMe <sub>2</sub> Py)Cl                 | —                                    | 75                 | 85                  | 50             |
| 4                  | Ir[dF(CF <sub>3</sub> )ppy] <sub>2</sub> dtbbpy | Co(dmgh) <sub>2</sub> (4-NMe <sub>2</sub> Py)Cl                 | Pd(PPh <sub>3</sub> )Cl <sub>2</sub> | <5                 | <5                  | <5             |
| 5                  | Ir[dF(CF <sub>3</sub> )ppy] <sub>2</sub> dtbbpy | Co(dmgh) <sub>2</sub> (4-NMe <sub>2</sub> Py)Cl                 | Cu(OAc) <sub>2</sub>                 | 42                 | 38                  | 15             |
| 6                  | Ir[dF(CF <sub>3</sub> )ppy] <sub>2</sub> dtbbpy | Co(dmgh) <sub>2</sub> (4-NMe <sub>2</sub> Py)Cl                 | CuCl                                 | 59                 | 63                  | 17             |
| 7                  | Ir[dF(CF <sub>3</sub> )ppy] <sub>2</sub> dtbbpy | Co(dmgh) <sub>2</sub> (4-NMe <sub>2</sub> Py)Cl                 | CuI                                  | 48                 | 57                  | 23             |
| 8                  | Ir[dF(CF <sub>3</sub> )ppy] <sub>2</sub> dtbbpy | Co(dmgh) <sub>2</sub> (4-NMe <sub>2</sub> Py)Cl                 | CuCl <sub>2</sub> ·2H <sub>2</sub> O | 90                 | 92                  | 62 (61)        |
| 9                  | Ir[dF(CF <sub>3</sub> )ppy] <sub>2</sub> dtbbpy | Co(dmgh) <sub>2</sub> (4-NMe <sub>2</sub> Py)Cl                 | Cu(OTf) <sub>2</sub>                 | 48                 | 39                  | 32             |

<sup>a</sup> Reaction conditions: **1a** (0.20 mmol), **2h** (0.40 mmol), solvent (1.0 mL), PS (1.0 mol %), [Co] (3.0 mol %), irradiation with blue LEDs for 30 h, <sup>1</sup>H NMR yield was reported using Cl<sub>2</sub>CHCHCl<sub>2</sub> as internal standard.

## GC-MS analysis of the crude products

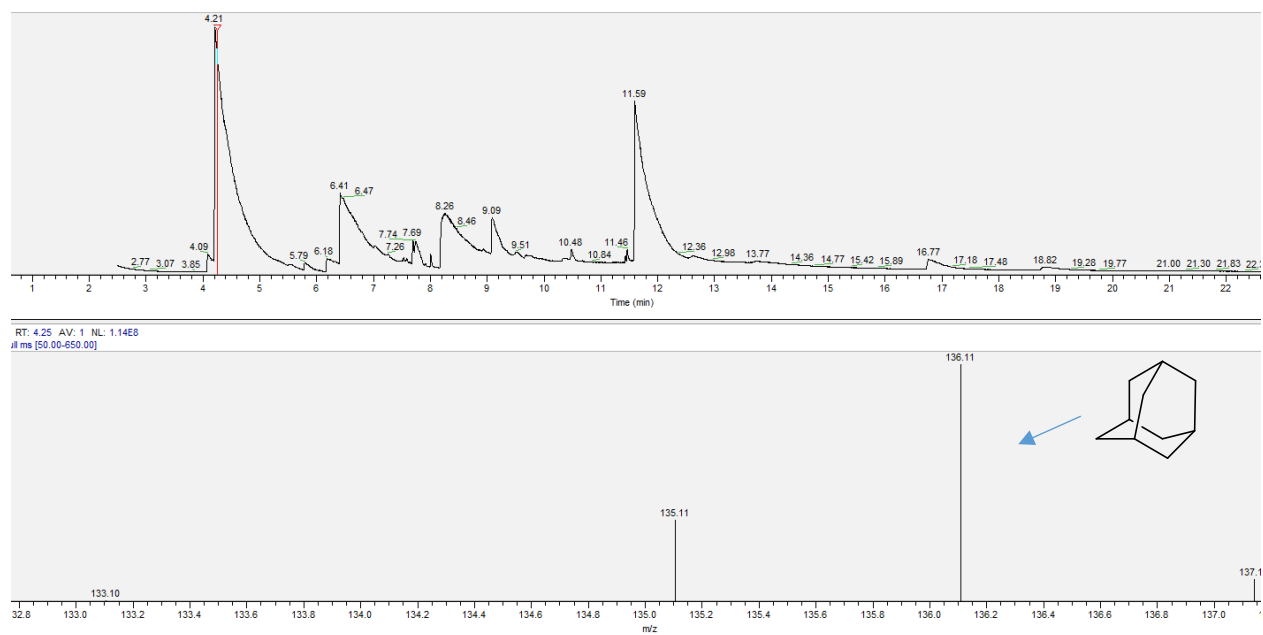

**Figure S1.** GC-MS spectrum of the crude products in **3aa** synthesis.

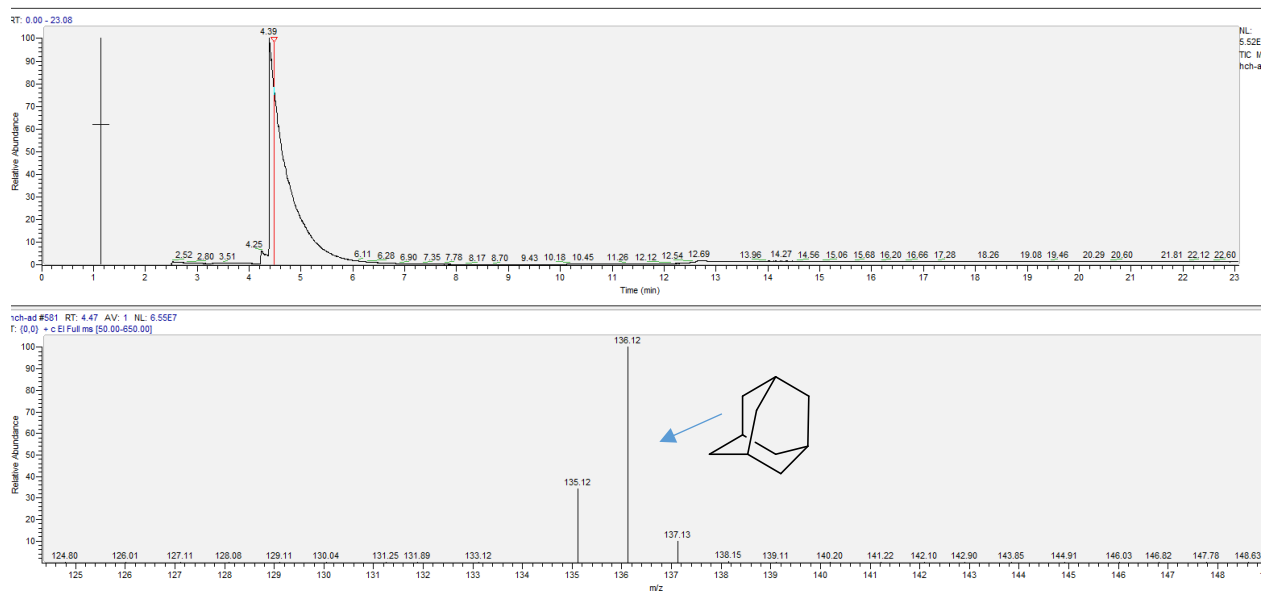

**Figure S2.** GC-MS spectrum of adamantane.

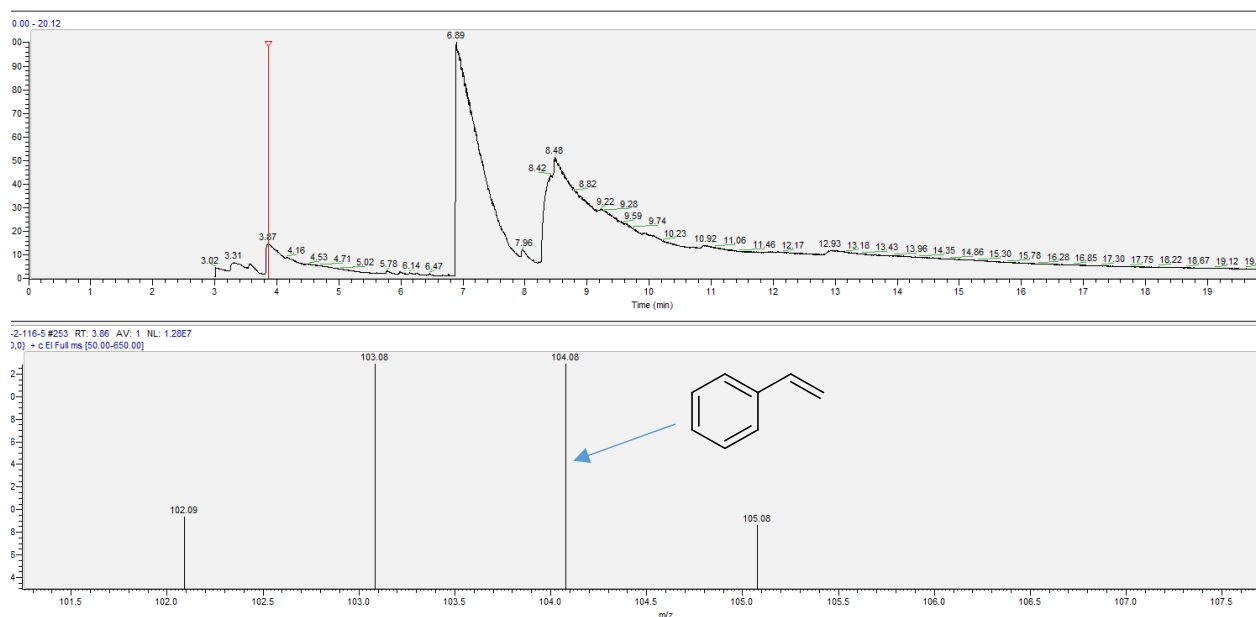

**Figure S3.** GC-MS spectrum of reaction mixture of **1a** with 3-phenylpropionic acid.

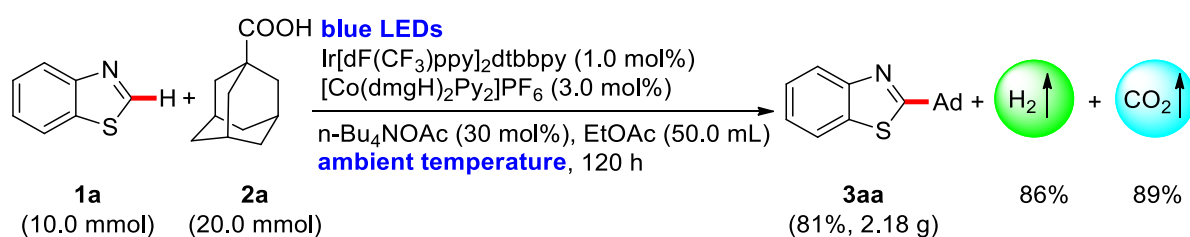

**Scheme S1.** Gram-scale reaction (Reaction conditions: 10.0 mmol of benzothiazole **1a**, 20.0 mmol of 1-adamantane carboxylic acid **2a**, 1 mol% Ir[dF(CF<sub>3</sub>)ppy]<sub>2</sub>dtbbpy, 3.0 mol% [Co(dmgH)<sub>2</sub>Py<sub>2</sub>]PF<sub>6</sub>, 30 mol% *n*-Bu<sub>4</sub>NOAc in 50 mL of EtOAc, blue LEDs, 120 h irradiation at ambient temperature).

## Characterization data for products

### Compound **3aa**<sup>4</sup>

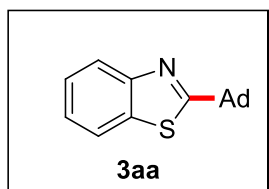

According to the general procedure, **3aa** (yellow solid, 49.5 mg) was obtained by column chromatography with the eluting (petroleum ether/Et<sub>2</sub>O = 100/1) in 92% yield with 94% H<sub>2</sub> yield and 103% CO<sub>2</sub> yield. <sup>1</sup>H NMR (400 MHz, CDCl<sub>3</sub>) δ 8.00 (d, *J* = 8.0 Hz, 1H), 7.85 (d, *J* = 7.6 Hz, 1H), 7.45–7.41 (m, 1H), 7.33–7.29 (m, 1H), 2.15 (s, 9H), 1.81 (s, 6H); <sup>13</sup>C NMR (100 MHz, CDCl<sub>3</sub>) δ 182.1, 153.1, 134.3, 125.6, 124.3, 122.6, 121.5, 42.9 (3C), 40.1, 36.5 (3C), 28.5 (3C); MS: *m/z*: [M]<sup>+</sup>, 269.10.

### Compound **3ba**<sup>4</sup>



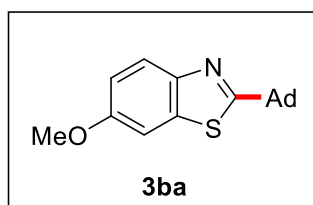

According to the general procedure, **3ba** (yellow solid, 50.9 mg) was obtained by column chromatography with the eluting (petroleum ether/Et<sub>2</sub>O = 200/1) in 85% yield with 91% H<sub>2</sub> yield and 99% CO<sub>2</sub> yield. <sup>1</sup>H NMR (400 MHz, CDCl<sub>3</sub>) δ 7.87 (d, *J* = 8.8 Hz, 1H), 7.31 (d, *J* = 2.4 Hz, 1H), 7.03 (dd, *J* = 8.8, *J* = 2.4 Hz, 1H), 3.85 (s, 3H), 2.13 (s, 9H), 1.81 (s, 6H); <sup>13</sup>C NMR (100 MHz, CDCl<sub>3</sub>) δ 179.6, 157.1, 147.6, 135.5, 123.0, 114.8, 104.2, 55.7, 42.9 (3C), 40.0, 36.5 (3C), 28.5 (3C); MS: *m/z*: [M]<sup>+</sup>, 299.11.

#### Compound **3ca**

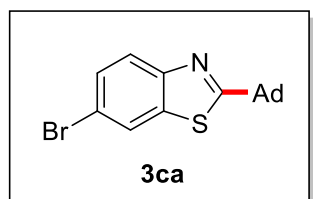

According to the general procedure, **3ca** (white solid, 60.5 mg) was obtained by column chromatography with the eluting (petroleum ether/Et<sub>2</sub>O = 200/1) in 87% yield with 89% H<sub>2</sub> yield and 95% CO<sub>2</sub> yield. <sup>1</sup>H NMR (400 MHz, CDCl<sub>3</sub>) δ 7.98 (d, *J* = 2.0 Hz, 1H), 7.83 (d, *J* = 8.8 Hz, 1H), 7.52 (dd, *J* = 8.4 Hz, *J* = 2.0 Hz, 1H), 2.13 (s, 9H), 1.81 (s, 6H); <sup>13</sup>C NMR (100 MHz, CDCl<sub>3</sub>) δ 184.0, 154.4, 133.2, 127.4, 125.6, 122.6, 119.2, 42.9 (3C), 40.3, 36.4 (3C), 28.5 (3C); IR (cm<sup>-1</sup>): ν 3357, 3188, 2919, 2850, 1660, 1634, 1470, 1423, 1322, 1217, 876, 817, 732, 720; HRMS: *m/z*: [M + H]<sup>+</sup> calculated for C<sub>17</sub>H<sub>18</sub>BrNS, 348.0416; found 348.0408.

#### Compound **3da**<sup>5</sup>

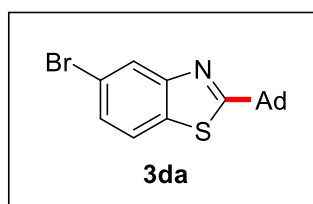

According to the general procedure, a prolonged reaction time of 42 h was applied, **3da** (white solid, 62.9 mg) was obtained by column chromatography with the eluting (petroleum ether/Et<sub>2</sub>O = 200/1) in 90% yield with 99% H<sub>2</sub> yield and 100% CO<sub>2</sub> yield. <sup>1</sup>H NMR (400 MHz, CDCl<sub>3</sub>): δ 8.14 (d, *J* = 2.0 Hz, 1H), 7.70 (d, *J* = 8.4 Hz, 1H), 7.42 (dd, *J* = 8.8 Hz, *J* = 2.0 Hz, 1H), 2.13 (s, 9H), 1.81 (s, 6H); <sup>13</sup>C NMR (100 MHz, CDCl<sub>3</sub>) δ 184.0, 154.4, 133.2, 127.4, 125.6, 122.6, 119.2, 42.9 (3C), 40.3, 36.4 (3C), 28.5 (3C); MS: *m/z*: [M]<sup>+</sup>, 347.04.

#### Compound **3ea**

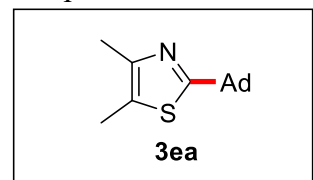

According to the general procedure, **3ea** (white solid, 26.0 mg) was obtained by column chromatography with the eluting (petroleum ether/Et<sub>2</sub>O = 70/1) in 53% yield with 50% H<sub>2</sub> yield and 56% CO<sub>2</sub> yield. <sup>1</sup>H NMR (400 MHz, CDCl<sub>3</sub>) δ 2.30–2.29 (m, 6H), 2.08 (s, 3H), 2.01 (s, 6H), 1.76 (s, 6H); <sup>13</sup>C NMR (100 MHz, CDCl<sub>3</sub>) δ 176.9, 147.0, 123.8, 43.16 (3C), 39.0, 36.5 (3C), 28.6 (3C), 14.7, 11.2; IR (cm<sup>-1</sup>): ν 3356, 3193, 2919, 2849, 1659, 1633, 1470, 1425, 1343, 1317, 1137, 1013, 809, 721, 703; HRMS: *m/z*: [M + H]<sup>+</sup> calculated for C<sub>15</sub>H<sub>22</sub>NS, 248.1467; found 248.1475.

### Compound **3fa**

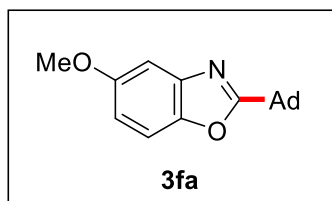

According to the general procedure, **3fa** (yellow solid, 49.6 mg) was obtained by column chromatography with the eluting (petroleum ether/Et<sub>2</sub>O = 50/1) in 88% yield with 92% H<sub>2</sub> yield and 90% CO<sub>2</sub> yield. <sup>1</sup>H NMR (400 MHz, CDCl<sub>3</sub>) δ 7.35 (d, *J* = 8.8 Hz, 1H), 7.20 (d, *J* = 2.4 Hz, 1H), 6.88 (dd, *J* = 8.8 Hz, *J* = 2.4 Hz, 1H), 3.83 (s, 3H), 2.14 (s, 9H), 1.81 (s, 6H); <sup>13</sup>C NMR (100 MHz, CDCl<sub>3</sub>) δ 173.9, 156.9, 145.1, 142.0, 112.6, 110.4, 102.9, 55.9, 40.2 (3C), 36.5 (3C), 36.1, 28.0 (3C); HRMS: *m/z*: [M + H]<sup>+</sup> calculated for C<sub>18</sub>H<sub>22</sub>NO<sub>2</sub>, 284.1645; found 284.1637.

### Compound **3ga**<sup>6</sup>

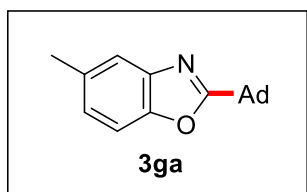

According to the general procedure, **3ga** (white solid, 50.1 mg) was obtained by column chromatography with eluting (petroleum ether/Et<sub>2</sub>O = 200/1) in 94% yield with 97% H<sub>2</sub> yield and 94% CO<sub>2</sub> yield. <sup>1</sup>H NMR (400 MHz, CDCl<sub>3</sub>) δ 7.47 (s, 1H), 7.34 (d, *J* = 8.4 Hz, 1H), 7.09 (d, *J* = 8.0 Hz), 2.45 (s, 3H), 2.14 (s, 9H), 1.81 (s, 6H); <sup>13</sup>C NMR (100 MHz, CDCl<sub>3</sub>) δ 173.0, 148.6, 141.4, 133.6, 125.2, 119.6, 109.6, 40.2 (3C), 36.4 (3C), 36.0, 27.9 (3C), 21.4; IR (cm<sup>-1</sup>): ν 3361, 3179, 2920, 2851, 1660, 1632, 1506, 1423, 1378, 1263, 1133, 1046, 749, 725, 719; HRMS: *m/z*: [M + H]<sup>+</sup> calculated for C<sub>18</sub>H<sub>22</sub>NO, 268.1696; found 268.1702.

### Compound **3ha**<sup>4</sup>

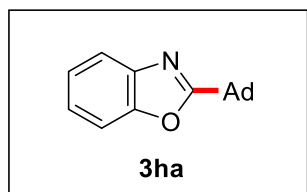

According to the general procedure, **3ha** (white solid, 46.8 mg) was obtained by column chromatography with the eluting (petroleum ether/Et<sub>2</sub>O = 100/1) in 92% yield with 100% H<sub>2</sub> yield and 98% CO<sub>2</sub> yield. <sup>1</sup>H NMR (400 MHz, CDCl<sub>3</sub>) δ 7.71–7.68 (m, 1H), 7.49–7.47 (m, 1H), 7.29–7.27 (m, 2H), 2.16–2.13 (m, 9H), 1.82 (s, 6H); <sup>13</sup>C NMR (100 MHz, CDCl<sub>3</sub>) δ 172.9, 150.4, 141.2, 124.2, 123.9, 119.6, 110.3, 40.2 (3C), 36.4 (3C), 36.0, 27.9 (3C); MS: *m/z*: [M]<sup>+</sup>, 253.13.

### Compound **3ia**

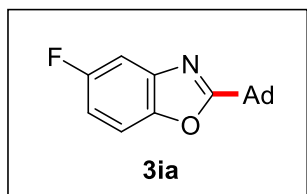

According to the general procedure, **3ia** (yellow solid, 46.6 mg) were obtained by column chromatography with the eluting (petroleum ether/Et<sub>2</sub>O = 100/1) in 86% yield and 89% H<sub>2</sub> yield and 95% CO<sub>2</sub> yield. <sup>1</sup>H NMR (400 MHz, CDCl<sub>3</sub>) δ 7.41–7.35 (m, 2H), 7.04–6.99 (m, 1H), 2.14 (s, 9H), 1.82 (s, 6H); <sup>13</sup>C NMR (100 MHz, CDCl<sub>3</sub>) δ 174.9, 159.8 (d, <sup>1</sup>*J*<sub>C-F</sub> = 238.1 Hz), 146.8 (d, <sup>4</sup>*J*<sub>C-F</sub> = 0.9 Hz), 142.1 (d, <sup>3</sup>*J*<sub>C-F</sub> = 12.9 Hz), 111.8 (d, <sup>2</sup>*J*<sub>C-F</sub> = 26.1 Hz), 110.5 (d, <sup>3</sup>*J*<sub>C-F</sub> = 10.0 Hz), 106.2 (d, <sup>2</sup>*J*<sub>C-F</sub> = 25.4 Hz), 40.2 (3C), 36.4 (3C), 36.2, 27.9 (3C); <sup>19</sup>F NMR (376 MHz, CDCl<sub>3</sub>): -118.8; HRMS: *m/z*: [M + H]<sup>+</sup> calculated for C<sub>17</sub>H<sub>19</sub>FNO, 272.1445; found 272.1449.

### Compound **3ja**<sup>6</sup>

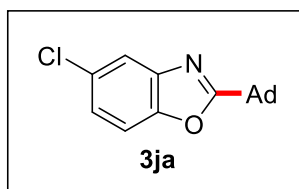

According to the general procedure, **3ja** (white solid, 52.1 mg) was obtained by column chromatography with the eluting (petroleum ether/Et<sub>2</sub>O = 200/1) in 90% yield with 90% H<sub>2</sub> yield and 100% CO<sub>2</sub> yield. <sup>1</sup>H NMR (400 MHz, CDCl<sub>3</sub>) δ 7.66 (d, *J* = 2.0 Hz, 1H), 7.39 (d, *J* = 8.8 Hz, 1H), 7.25 (dd, *J* = 8.8 Hz, *J* = 2.0 Hz, 1H), 2.14 (s, 9H), 1.82 (s, 6H); <sup>13</sup>C NMR (100 MHz, CDCl<sub>3</sub>) δ 174.4, 149.1, 142.4, 129.3, 124.5, 119.7, 111.0, 40.1 (3C), 36.4 (3C), 36.2, 27.8 (3C); MS: *m/z*: [M]<sup>+</sup>, 287.07.

#### Compound **3ka**

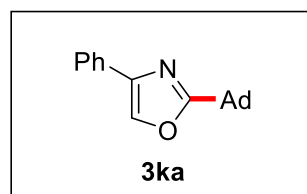

According to the general procedure, **3ka** (yellow solid, 45.4 mg) was obtained by column chromatography with the eluting (petroleum ether/Et<sub>2</sub>O = 100/1) in 81% yield with 90% H<sub>2</sub> yield and 87% CO<sub>2</sub> yield. <sup>1</sup>H NMR (400 MHz, CDCl<sub>3</sub>) δ 7.62 (d, *J* = 7.6 Hz, 2H), 7.39 (t, *J* = 7.6 Hz, 2H), 7.30–7.26 (m, 1H), 7.22 (s, 1H), 2.10 (s, 9H), 1.80 (s, 6H); <sup>13</sup>C NMR (100 MHz, CDCl<sub>3</sub>) δ 170.4, 150.2, 128.7 (2C), 128.4, 127.9, 123.9 (2C), 121.4, 40.3 (3C), 36.4 (3C), 35.7, 28.0 (3C); IR (cm<sup>-1</sup>): ν 2905, 2851, 1637, 1547, 1452, 1413, 1345, 1326, 1284, 1128, 1081, 944, 737, 691; HRMS: *m/z*: [M + H]<sup>+</sup> calculated for C<sub>19</sub>H<sub>22</sub>NO, 280.1696; found 280.1697.

#### Compounds **3la** and **3la'**

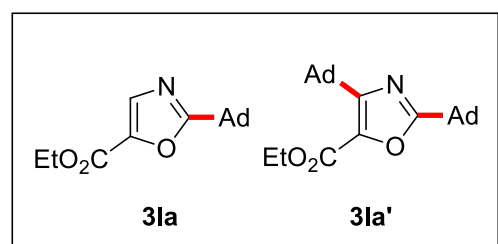

According to the general procedure, **3la** (white solid, 35.1 mg, 64%) and **3la'** (white solid, 20.1 mg, 25%) were obtained by column chromatography with eluting (petroleum ether/Et<sub>2</sub>O = 100/1) in 89% total yield with 95% H<sub>2</sub> yield and 92% CO<sub>2</sub> yield. **3la:3la'** = 2.6:1.0. **3la**: <sup>1</sup>H NMR (400 MHz, CDCl<sub>3</sub>) δ 7.64 (s, 1H), 4.37 (q, *J* = 6.8 Hz, 2H), 2.08 (s, 9H), 1.79 (s, 6H), 1.38 (t, *J* = 7.2 Hz, 3H); <sup>13</sup>C NMR (100 MHz, CDCl<sub>3</sub>) δ 174.0, 158.0, 141.8, 133.9, 61.2, 40.0 (3C), 36.3 (3C), 36.1, 27.8 (3C), 14.3; IR (cm<sup>-1</sup>): ν 3363, 3187, 2919, 2851, 1742, 1660, 1525, 1470, 1314, 1212, 1144, 868, 832, 723; HRMS: *m/z*: [M + H]<sup>+</sup> calculated for C<sub>16</sub>H<sub>22</sub>NO<sub>3</sub>, 276.1594; found 276.1597. **3la'**: <sup>1</sup>H NMR (400 MHz, CDCl<sub>3</sub>) δ 4.36 (q, *J* = 7.2 Hz, 2H), 2.12 (s, 6H), 2.08–2.05 (m, 12H), 1.81–1.72 (m, 12H), 1.40 (t, *J* = 7.2 Hz, 3H); <sup>13</sup>C NMR (100 MHz, CDCl<sub>3</sub>) δ 170.3, 159.1, 157.3, 136.0, 60.8, 40.1 (3C), 39.9 (3C), 36.8 (3C), 36.4 (3C), 35.8, 34.7, 28.7 (3C), 28.0 (3C), 14.4; IR (cm<sup>-1</sup>): ν 3362, 3177, 2908, 2851, 1632, 1478, 1452, 1345, 1322, 1132, 1047, 854, 812, 704; HRMS: *m/z*: [M + H]<sup>+</sup> calculated for C<sub>26</sub>H<sub>36</sub>NO<sub>3</sub>, 410.2690; found 410.2735.

#### Compound **3ma**

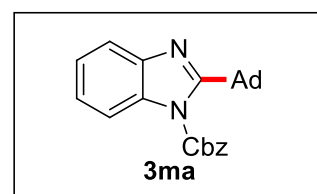

According to the general procedure, **3ma** (white solid, 48.4 mg) was obtained by column chromatography with the eluting (petroleum ether/Et<sub>2</sub>O = 50/1) in 63% yield with 66% H<sub>2</sub> yield and 79% CO<sub>2</sub> yield. <sup>1</sup>H NMR (400 MHz, CDCl<sub>3</sub>) δ 7.71 (d, *J* = 8.0 Hz, 2H), 7.53–7.50 (m, 2H), 7.46–7.39 (m, 3H), 7.29–7.20 (m, 2H), 5.53 (s, 2H), 2.31 (d, *J* = 2.8 Hz, 6H), 2.08 (s, 3H), 1.80–1.73 (m, 6H); <sup>13</sup>C NMR (100 MHz,

CDCl<sub>3</sub>)  $\delta$  162.4, 151.0, 141.4, 134.1, 134.0, 129.1, 129.0 (2C), 128.9 (2C), 124.3, 124.0, 119.8, 114.6, 69.9, 39.5 (3C), 38.5, 36.5 (3C), 28.5 (3C); IR (cm<sup>-1</sup>):  $\nu$  3359, 3035, 2905, 2849, 1754, 1658, 1456, 1382, 1307, 1189, 1050, 980, 762, 744; HRMS:  $m/z$ : [M + H]<sup>+</sup> calculated for C<sub>25</sub>H<sub>27</sub>N<sub>2</sub>O<sub>2</sub>, 387.2067; found 387.2070.

#### Compound **3na**

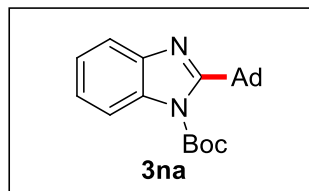

According to the general procedure, **3na** (white solid, 44.1 mg) was obtained by column chromatography with the eluting (petroleum ether/Et<sub>2</sub>O = 40/1) in 63% yield with 64% H<sub>2</sub> yield and 70% CO<sub>2</sub> yield. <sup>1</sup>H NMR (400 MHz, CDCl<sub>3</sub>)  $\delta$  7.74–7.67 (m, 2H), 7.29–7.26 (m, 2H), 2.33 (s, 6H), 2.11 (s, 3H), 1.88–1.76 (m, 6H), 1.72 (s, 9H); <sup>13</sup>C NMR (100 MHz, CDCl<sub>3</sub>)  $\delta$  162.2, 149.7, 141.3, 134.1, 123.9, 123.5, 119.7, 113.7, 85.3, 39.6 (3C), 38.2, 36.6 (3C), 28.5 (3C), 28.0 (3C); IR (cm<sup>-1</sup>):  $\nu$  3357, 3189, 2918, 2849, 1751, 1659, 1632, 1470, 1454, 1322, 1132, 1151, 844, 763, 702; HRMS:  $m/z$ : [M + H]<sup>+</sup> calculated for C<sub>22</sub>H<sub>29</sub>N<sub>2</sub>O<sub>2</sub>, 353.2224; found 353.2211.

#### Compound **3oa**

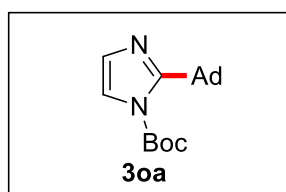

According to the general procedure, **3oa** (white solid, 25.0 mg) was obtained by column chromatography with eluting (petroleum ether/Et<sub>2</sub>O = 30/1) in 41% yield with 49% H<sub>2</sub> yield and 51% CO<sub>2</sub> yield. <sup>1</sup>H NMR (400 MHz, CDCl<sub>3</sub>)  $\delta$  7.30 (d,  $J$  = 1.6 Hz, 1H), 6.82 (d,  $J$  = 2.0 Hz, 1H), 2.21 (s, 6H), 2.06 (s, 3H), 1.82–1.73 (m, 6H), 1.61 (s, 9H); <sup>13</sup>C NMR (100 MHz, CDCl<sub>3</sub>)  $\delta$  157.7, 148.1, 126.0, 120.6, 84.6, 39.2 (3C), 37.4, 36.6 (3C), 28.5 (3C), 27.9 (3C); IR (cm<sup>-1</sup>):  $\nu$  3360, 3186, 2919, 2851, 1752, 1658, 1634, 1485, 1470, 1345, 1314, 1132, 1157, 859, 815, 748; HRMS:  $m/z$ : [M + H]<sup>+</sup> calculated for C<sub>18</sub>H<sub>27</sub>N<sub>2</sub>O<sub>2</sub>, 303.2067; found 303.2071.

#### Compound **3pa**

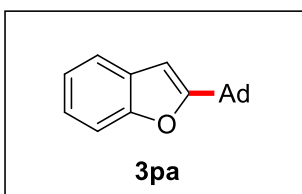

According to the general procedure, **3pa** (white solid, 31.5 mg) was obtained by column chromatography with eluting (petroleum ether/Et<sub>2</sub>O = 100/1) in 62% yield with 66% H<sub>2</sub> yield and 70% CO<sub>2</sub> yield. <sup>1</sup>H NMR (400 MHz, CDCl<sub>3</sub>)  $\delta$  7.50–7.47 (m, 1H), 7.41 (d,  $J$  = 7.6 Hz, 1H), 7.22–7.14 (m, 2H), 6.30 (s, 1H), 2.09 (s, 3H), 2.01 (s, 6H), 1.83–1.76 (m, 6H); <sup>13</sup>C NMR (100 MHz, CDCl<sub>3</sub>)  $\delta$  167.6, 154.3, 128.8, 122.9, 122.2, 120.3, 110.8, 98.5, 40.9 (3C), 36.8 (3C), 34.9, 28.2 (3C); IR (cm<sup>-1</sup>):  $\nu$  3357, 3189, 2918, 2849, 1659, 1632, 1470, 1456, 1136, 738, 721, 706; HRMS:  $m/z$ : [M]<sup>+</sup> calculated for C<sub>18</sub>H<sub>20</sub>O, 252.1509; found 252.1515.

### Compound **3qa**

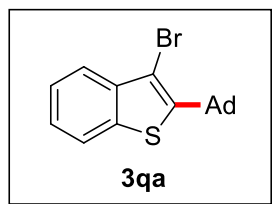

According to the general procedure, **3qa** (white solid, 53.2 mg) was obtained by column chromatography with the eluting (pure petroleum ether) in 77% yield with 75% H<sub>2</sub> yield and 82% CO<sub>2</sub> yield. <sup>1</sup>H NMR (400 MHz, CDCl<sub>3</sub>) δ 7.81 (d, *J* = 8.0 Hz, 1H), 7.75 (d, *J* = 8.0 Hz, 1H), 7.43–7.38 (m, 1H), 7.34–7.30 (m, 1H), 2.33 (d, *J* = 2.4 Hz, 6H), 2.12 (s, 3H), 1.84–1.77 (m, 6H); <sup>13</sup>C NMR (100 MHz, CDCl<sub>3</sub>) δ 149.1, 139.8, 135.6, 124.7, 124.5, 122.4, 121.9, 101.5, 40.9 (3C), 37.6, 36.5 (3C), 28.7 (3C); IR (cm<sup>-1</sup>): ν 3357, 3188, 2919, 2850, 1659, 1632, 1470, 1424, 1299, 1137, 1019, 806, 724, 703; HRMS: *m/z*: [M]<sup>+</sup> calculated for C<sub>18</sub>H<sub>19</sub>BrS, 346.0385; found 346.0396.

### Compound **3ra**

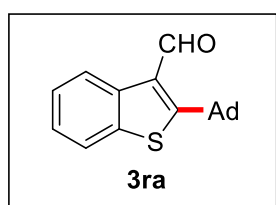

According to the general procedure, **3ra** (white solid, 33.3 mg) was obtained by column chromatography with the eluting (petroleum ether/Et<sub>2</sub>O = 100/1) in 56% yield with 63% H<sub>2</sub> yield and 58% CO<sub>2</sub> yield. <sup>1</sup>H NMR (400 MHz, CDCl<sub>3</sub>) δ 10.88 (s, 1H), 8.68 (d, *J* = 8.0 Hz, 1H), 7.78 (d, *J* = 8.0 Hz, 1H), 7.44 (t, *J* = 7.6 Hz, 1H), 7.35 (t, *J* = 7.6 Hz, 1H), 2.28 (s, 6H), 2.16 (s, 3H), 1.83 (s, 6H); <sup>13</sup>C NMR (100 MHz, CDCl<sub>3</sub>) δ 185.8, 173.1, 138.7, 136.1, 129.3, 125.8, 125.0, 124.8, 121.3, 44.9 (3C), 39.2, 36.3 (3C), 28.9 (3C); IR (cm<sup>-1</sup>): ν 3361, 3195, 2920, 2850, 1660, 1633, 1470, 1458, 1347, 1132, 1159, 900, 810, 734; HRMS: *m/z*: [M]<sup>+</sup> calculated for C<sub>19</sub>H<sub>20</sub>OS, 296.1229; found 296.1228.

### Compound **3sa**<sup>7</sup>

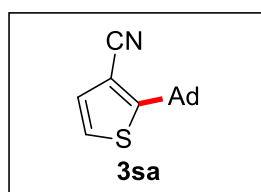

According to the general procedure, **3sa** (yellow solid, 44.5 mg) was obtained by column chromatography with eluting (petroleum ether/Et<sub>2</sub>O = 100/1) in 91% yield with 91% H<sub>2</sub> yield and 100% CO<sub>2</sub> yield. <sup>1</sup>H NMR (400 MHz, CDCl<sub>3</sub>) δ 7.17 (d, *J* = 5.6 Hz, 1H), 7.12 (d, *J* = 5.2 Hz, 1H), 2.17 (s, 6H), 2.12 (s, 3H), 1.79 (s, 6H); <sup>13</sup>C NMR (100 MHz, CDCl<sub>3</sub>) δ 167.5, 130.5, 122.3, 116.4, 104.3, 42.6 (3C), 37.5, 36.2 (3C), 28.6 (3C); MS: *m/z*: [M]<sup>+</sup>, 243.09.

### Compound **3ta**<sup>7</sup>

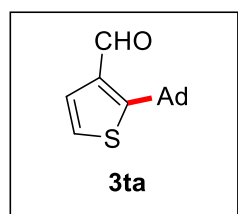

According to the general procedure, **3ta** (white solid, 36.3 mg) was obtained by column chromatography with eluting (petroleum ether/Et<sub>2</sub>O = 100/1) in 74% yield with 74% H<sub>2</sub> yield and 74% CO<sub>2</sub> yield. White Solid. <sup>1</sup>H NMR (400 MHz, CDCl<sub>3</sub>) δ 10.48 (s, 1H), 7.51 (d, *J* = 5.2 Hz, 1H), 7.04 (d, *J* = 5.6 Hz, 1H), 2.18 (s, 6H), 2.13 (s, 3H), 1.81 (s, 6H); <sup>13</sup>C NMR (100 MHz, CDCl<sub>3</sub>) δ 185.1, 168.0, 136.6, 128.9, 121.3, 44.8 (3C), 38.4, 36.3 (3C), 28.9 (3C); MS: *m/z*: [M]<sup>+</sup>, 246.09.

### Compound **3ua**

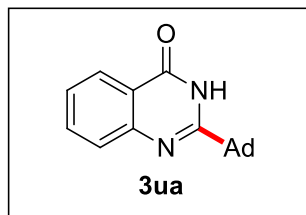

According to the general procedure, **3ua** (yellow solid, 40.0 mg) was obtained by column chromatography with eluting (petroleum ether/DCM/Et<sub>2</sub>O = 10/2/1) in 71% yield with 73% H<sub>2</sub> yield and 85% CO<sub>2</sub> yield. <sup>1</sup>H NMR (400 MHz, CDCl<sub>3</sub>) δ 11.04 (s, 1H), 8.27 (d, *J* = 7.6 Hz, 1H), 7.78–7.72 (m, 2H), 7.48–7.45 (m, 1H), 2.18 (s, 6H), 2.15 (s, 3H), 1.85 (s, 6H); Yellow solid. <sup>13</sup>C NMR (100 MHz, CDCl<sub>3</sub>) δ 163.7, 161.8, 149.4, 134.4, 127.7, 126.3, 126.1, 120.8, 39.7 (3C), 39.1, 36.5 (3C), 28.3 (3C); IR (cm<sup>-1</sup>): ν 3395, 3175, 3404, 2920, 2849, 1633, 1607, 1469, 1420, 1344, 1254, 1104, 986, 868, 762, 722; HRMS: *m/z*: [M]<sup>+</sup> calculated for C<sub>18</sub>H<sub>20</sub>N<sub>2</sub>O, 280.1570; found 280.1579.

### Compound **3va**

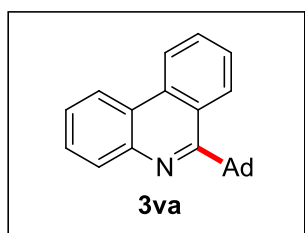

According to the general procedure, **3va** (white solid, 51.3 mg) was obtained by column chromatography with eluting (petroleum ether/Et<sub>2</sub>O = 100/1) in 82% yield with 90% H<sub>2</sub> yield and 88% CO<sub>2</sub> yield. White solid. <sup>1</sup>H NMR (400 MHz, CDCl<sub>3</sub>) δ 8.84 (d, *J* = 8.4 Hz, 1H), 8.66 (d, *J* = 8.4 Hz, 1H), 8.49 (dd, *J* = 8.4 Hz, *J* = 0.8 Hz, 1H), 8.11 (dd, *J* = 8.4 Hz, *J* = 1.2 Hz, 1H), 7.75–7.71 (m, 1H), 7.69–7.65 (m, 1H), 7.62–7.55 (m, 2H), 2.48 (d, *J* = 2.4 Hz, 6H), 2.22 (s, 3H), 1.90 (q, *J* = 12.0 Hz, 6H); <sup>13</sup>C NMR (100 MHz, CDCl<sub>3</sub>) δ 166.0, 143.1, 134.0, 130.2, 129.1, 128.3, 128.0, 126.4, 125.6, 124.4, 123.2, 123.0, 121.6, 42.9, 42.0 (3C), 37.2 (3C), 29.2 (3C); IR (cm<sup>-1</sup>): ν 3359, 3187, 3072, 2902, 2849, 1659, 1632, 1485, 1453, 1345, 1252, 1167, 1049, 992, 758, 728; HRMS: *m/z*: [M + H]<sup>+</sup> calculated for C<sub>23</sub>H<sub>24</sub>N, 314.1903; found 314.1909.

### Compound **3wa**

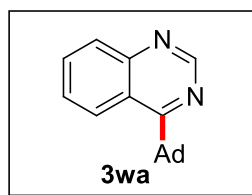

According to the general procedure, **3wa** (pale red solid, 36.7 mg) was obtained by column chromatography with the eluting (petroleum ether/Et<sub>2</sub>O = 50/1) in 69% yield with 76% H<sub>2</sub> yield and 81% CO<sub>2</sub> yield. <sup>1</sup>H NMR (400 MHz, CDCl<sub>3</sub>) δ 9.25 (s, 1H), 8.67 (d, *J* = 8.8 Hz, 1H), 8.06 (dd, *J* = 8.4 Hz, *J* = 1.2 Hz, 1H), 7.84–7.80 (m, 1H), 7.60–7.55 (m, 1H), 2.37 (d, *J* = 2.8 Hz, 6H), 2.21 (s, 3H), 1.89 (s, 6H); <sup>13</sup>C NMR (100 MHz, CDCl<sub>3</sub>) δ 176.1, 153.9, 151.0, 132.3, 130.2, 126.3, 125.9, 123.3, 42.8, 41.7 (3C), 36.8 (3C), 28.8 (3C); IR (cm<sup>-1</sup>): ν 3358, 3199, 2920, 2849, 1633, 1470, 1450, 1373, 1360, 1137, 1100, 997, 824, 762; HRMS: *m/z*: [M + H]<sup>+</sup> calculated for C<sub>18</sub>H<sub>21</sub>N<sub>2</sub>, 265.1699; found 265.1694.

### Compound **3ab**<sup>4</sup>

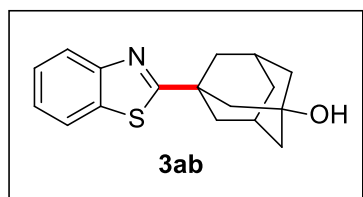

According to the general procedure, **3ab** (white solid, 50.2 mg) was obtained by column chromatography with eluting (petroleum ether/Et<sub>2</sub>O = 1/1) in 88% yield with 98% H<sub>2</sub> yield and 93% CO<sub>2</sub> yield. <sup>1</sup>H NMR (400 MHz, CDCl<sub>3</sub>) δ 8.00 (d, *J* = 8.4 Hz, 1H), 7.86–7.84 (m, 1H), 7.46–7.42 (m, 1H), 7.36–7.31 (m, 1H), 2.38–2.37 (m, 2H), 2.12 (s, 2H), 2.09–2.01 (m, 4H), 1.88 (br, 1H), 1.81 (s, 4H),



1.73–1.64 (m, 2H);  $^{13}\text{C}$  NMR (100 MHz,  $\text{CDCl}_3$ )  $\delta$  180.0, 153.0, 134.3, 125.8, 124.6, 122.7, 121.5, 68.6, 50.2, 44.3 (2C), 43.4, 41.7 (2C), 35.0, 30.7 (2C); IR ( $\text{cm}^{-1}$ ):  $\nu$  3357, 3191, 2919, 2850, 1659, 1633, 1470, 1437, 1353, 1244, 1115, 1080, 929, 759, 729; MS:  $m/z$ :  $[\text{M}]^+$ , 285.11.

#### Compound **3ac**

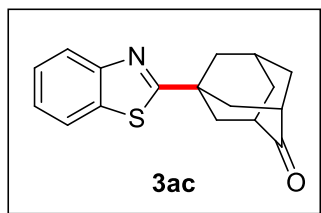

According to the general procedure, **3ac** (white solid, 39.2 mg) were obtained by column chromatography with eluting (petroleum ether/ $\text{Et}_2\text{O}$  = 20/1) in 69% yield with 71%  $\text{H}_2$  yield and 74%  $\text{CO}_2$  yield.  $^1\text{H}$  NMR (400 MHz,  $\text{CDCl}_3$ )  $\delta$  8.00 (d,  $J$  = 8.0 Hz, 1H), 7.88 (d,  $J$  = 8.0 Hz, 1H), 7.49–7.45 (m, 1H), 7.39–7.35 (m, 1H), 2.73 (s, 2H), 2.50–2.43 (m, 4H), 2.38 (s, 2H), 2.34–2.32 (m, 1H), 2.20–2.08 (m, 4H);  $^{13}\text{C}$  NMR (100 MHz,  $\text{CDCl}_3$ )  $\delta$  216.3, 178.3, 153.0, 134.3, 126.0, 124.8, 122.8, 121.6, 46.2 (2C), 43.7 (2C), 41.8, 39.6, 38.3 (2C), 27.8; IR ( $\text{cm}^{-1}$ ):  $\nu$  3354, 3195, 2920, 2851, 1724, 1633, 1470, 1436, 1268, 1241, 1135, 1060, 875, 762, 735; HRMS:  $m/z$ :  $[\text{M} + \text{H}]^+$  calculated for  $\text{C}_{17}\text{H}_{18}\text{NOS}$ , 284.1104; found 284.1108.

#### Compound **3ad**

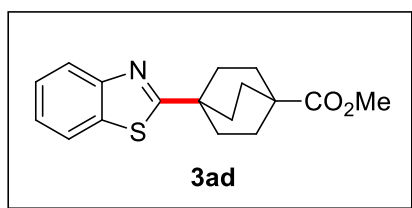

According to the general procedure, **3ad** (white solid, 52.9 mg) was obtained by column chromatography with eluting (petroleum ether/ $\text{Et}_2\text{O}$  = 50/1) in 88% yield with 92%  $\text{H}_2$  yield and 98%  $\text{CO}_2$  yield.  $^1\text{H}$  NMR (400 MHz,  $\text{CDCl}_3$ )  $\delta$  7.98 (d,  $J$  = 8.4 Hz, 1H), 7.85 (d,  $J$  = 8.0 Hz, 1H), 7.43–7.46 (m, 1H), 7.36–7.32 (m, 1H), 3.69 (s, 3H), 2.12–2.08 (m, 6H), 1.99–1.95 (m, 6H);  $^{13}\text{C}$  NMR (100 MHz,  $\text{CDCl}_3$ )  $\delta$  180.0, 177.8, 153.2, 134.6, 125.8, 124.6, 122.7, 121.5, 51.8, 39.2, 38.3, 31.8 (3C), 28.4 (3C); IR ( $\text{cm}^{-1}$ ):  $\nu$  3359, 3182, 2920, 2870, 1731, 1632, 1509, 1437, 1348, 1312, 1132, 1067, 1021, 897, 757, 732; HRMS:  $m/z$ :  $[\text{M} + \text{H}]^+$  calculated for  $\text{C}_{17}\text{H}_{20}\text{NO}_2\text{S}$ , 302.1209; found 302.1206.

#### Compound **3ae**<sup>4</sup>

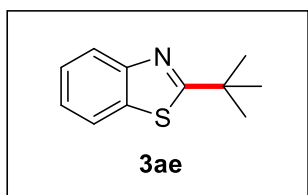

According to the general procedure, **3ae** (yellow liquid, 14.0 mg) was obtained by column chromatography with eluting (petroleum ether/ $\text{Et}_2\text{O}$  = 200/1) in 37% yield with 66%  $\text{H}_2$  yield and 59%  $\text{CO}_2$  yield.  $^1\text{H}$  NMR (400 MHz,  $\text{CDCl}_3$ )  $\delta$  7.99 (d,  $J$  = 8.0 Hz, 1H), 7.84 (d,  $J$  = 8.0 Hz, 1H), 7.43 (t,  $J$  = 7.6 Hz, 1H), 7.32 (t,  $J$  = 7.6 Hz, 1H), 1.52 (s, 9H);  $^{13}\text{C}$  NMR (100 MHz,  $\text{CDCl}_3$ )  $\delta$  181.8, 153.2, 134.9, 125.7, 124.5, 122.6, 121.4, 38.3, 30.7 (3C); MS:  $m/z$ :  $[\text{M}]^+$ , 191.07

#### Compound **3af**

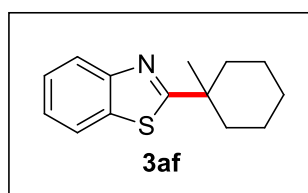

According to the general procedure, employing  $\text{Co}(\text{dmgH})_2(\text{DMAP})\text{Cl}$  as cobalt catalyst and changing the solvent to *i*-PrOH, **3af** (yellow liquid, 19.4 mg) was obtained by column chromatography with eluting (petroleum ether/ $\text{Et}_2\text{O}$  = 200/1) in 42% yield with 108%  $\text{H}_2$  yield and 105%  $\text{CO}_2$  yield.

$^1\text{H}$  NMR (400 MHz,  $\text{CDCl}_3$ )  $\delta$  7.99 (d,  $J$  = 8.4 Hz, 1H), 7.86 (d,  $J$  = 8.0 Hz, 1H), 7.46–7.42 (m, 1H), 7.35–7.31 (m, 1H), 2.27–2.21 (m, 2H), 1.74–1.45 (m, 8H), 1.41 (s, 3H);  $^{13}\text{C}$  NMR (100 MHz,  $\text{CDCl}_3$ )  $\delta$  181.7, 153.3, 134.9, 125.6, 124.4, 122.7, 121.5, 42.0, 38.5 (2C), 29.7, 25.8, 22.6 (2C); IR ( $\text{cm}^{-1}$ ):  $\nu$  3356, 3198, 2922, 2851, 1659, 1632, 1470, 1437, 1312, 1262, 1189, 1009, 959, 758, 729; HRMS:  $m/z$ :  $[\text{M} + \text{H}]^+$  calculated for  $\text{C}_{14}\text{H}_{18}\text{NS}$ , 232.1154; found 232.1159.

#### Compound **3ag**

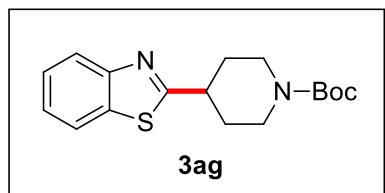

According to the general procedure, **3ag** (white solid, 19.1 mg,) was obtained by column chromatography with eluting (petroleum ether/ $\text{Et}_2\text{O}$  = 100/1) in 30% total yield with 57%  $\text{H}_2$  yield and 86%  $\text{CO}_2$  yield.

$^1\text{H}$  NMR (400 MHz,  $\text{CDCl}_3$ )  $\delta$  7.98 (d,  $J$  = 8.4 Hz, 1H), 7.86 (d,  $J$  = 8.0 Hz, 1H), 7.47 (t,  $J$  = 7.6 Hz, 1H), 7.36 (t,  $J$  = 7.6 Hz, 1H), 4.24 (br, 2H), 3.30–3.22 (m, 1H), 2.92 (t,  $J$  = 11.6 Hz, 2H), 2.16 (d,  $J$  = 12.8 Hz, 2H), 1.90–1.80 (m, 2H), 1.48 (s, 9H);  $^{13}\text{C}$  NMR (100 MHz,  $\text{CDCl}_3$ )  $\delta$  175.1, 154.7, 153.1, 134.5, 126.0, 124.8, 122.7, 121.6, 79.7, 43.7 (2C), 41.5, 32.1 (2C), 28.5 (3C); IR ( $\text{cm}^{-1}$ ):  $\nu$  3359, 3062, 2975, 2851, 1692, 1632, 1515, 1422, 1365, 1317, 1275, 1167, 1010, 889, 760, 731; HRMS:  $m/z$ :  $[\text{M} + \text{H}]^+$  calculated for  $\text{C}_{17}\text{H}_{23}\text{N}_2\text{O}_2\text{S}$ , 319.1475; found 319.1479.

#### Compound **3ah**<sup>8</sup>

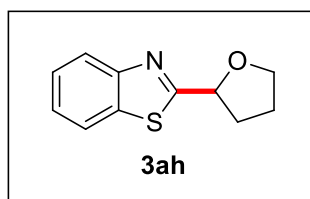

According to the general procedure, employing  $\text{Co}(\text{dmgH})_2(\text{DMAP})\text{Cl}$  as cobalt catalyst and introducing 10 mol% of  $\text{CuCl}_2 \cdot 2\text{H}_2\text{O}$  as additive, **3ah** (colorless oil, 24.9 mg) was obtained by column chromatography with eluting (petroleum ether/ $\text{Et}_2\text{O}$  = 200/1) in 61% yield with 82%  $\text{H}_2$  yield and 91%  $\text{CO}_2$  yield.

$^1\text{H}$  NMR (400 MHz,  $\text{CDCl}_3$ )  $\delta$  7.98 (d,  $J$  = 8.0 Hz, 1H), 7.89 (d,  $J$  = 8.0 Hz, 1H), 7.46 (t,  $J$  = 7.6 Hz, 1H), 7.36 (t,  $J$  = 7.6 Hz, 1H), 5.35 (dd,  $J$  = 7.8 Hz,  $J$  = 5.4 Hz, 1H), 4.19–4.13 (m, 1H), 4.04–3.98 (m, 1H), 2.57–2.48 (m, 1H), 2.31–2.23 (m, 1H), 2.07–2.00 (m, 2H);  $^{13}\text{C}$  NMR (100 MHz,  $\text{CDCl}_3$ )  $\delta$  176.4, 153.6, 134.7, 125.9, 124.7, 122.7, 121.7, 78.7, 69.4, 33.3, 25.7; MS:  $m/z$ :  $[\text{M}]^+$ , 205.05.

#### Compound **3ai**

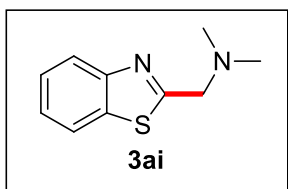

According to the general procedure, employing  $\text{Co}(\text{dmgH})_2(\text{DMAP})\text{Cl}$  as cobalt catalyst and increasing the amount of **2** to 0.6 mmol, **3ai** (yellow liquid, 23.2 mg) was obtained by column chromatography with eluting (petroleum ether/ $\text{Et}_2\text{O}$  = 200/1) in 60% total yield with 72%  $\text{H}_2$  yield and 75%  $\text{CO}_2$  yield.

$^1\text{H}$  NMR (400 MHz,  $\text{CDCl}_3$ )  $\delta$  7.98 (d,  $J$  = 8.0 Hz, 1H), 7.88 (d,  $J$  = 7.6 Hz, 1H), 7.48–7.44 (m, 1H), 7.39–7.35 (m, 1H), 3.90 (s, 2H), 2.42 (s, 6H);  $^{13}\text{C}$  NMR (100 MHz,  $\text{CDCl}_3$ )  $\delta$  172.2, 153.1, 135.4, 125.8, 124.8, 122.8, 121.7, 61.7, 45.8 (2C); IR ( $\text{cm}^{-1}$ )  $\nu$  3359, 3059, 2975, 2853, 1736, 1633, 1455, 1436, 1348, 1264, 1138, 1036, 843, 760, 731; HRMS:  $m/z$ :  $[\text{M} + \text{H}]^+$  calculated for  $\text{C}_{10}\text{H}_{13}\text{N}_2\text{S}$ , 193.0794; found 193.0798.



### Compound **3aj**

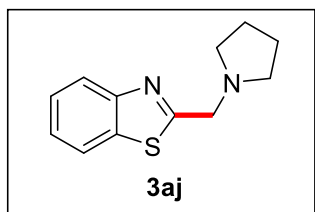

According to the general procedure, employing  $\text{Co}(\text{dmgH})_2(\text{DMAP})\text{Cl}$  as cobalt catalyst and increasing the amount of **2** to 0.6 mmol, **3aj** (yellow liquid, 26.9 mg) was obtained by column chromatography with eluting (petroleum ether/ $\text{Et}_2\text{O}$  = 200/1) in 62% yield with 68%  $\text{H}_2$  yield and 82%  $\text{CO}_2$  yield.  $^1\text{H}$  NMR (400 MHz,  $\text{CDCl}_3$ )  $\delta$  7.98 (d,  $J$  = 8.0 Hz, 1H), 7.87 (d,  $J$  = 7.6 Hz, 1H), 7.47–7.43 (m, 1H), 7.38–7.34 (m, 1H), 4.09 (s, 2H), 2.74–2.70 (m, 4H), 1.89–1.82 (m, 4H);  $^{13}\text{C}$  NMR (100 MHz,  $\text{CDCl}_3$ )  $\delta$  172.6, 153.2, 135.4, 125.7, 124.7, 122.8, 121.7, 58.0, 54.4 (2C), 23.8 (2C); IR ( $\text{cm}^{-1}$ ):  $\nu$  3359, 3193, 2919, 2849, 1659, 1633, 1470, 1429, 1349, 1320, 1164, 1121, 862, 760, 721; HRMS:  $m/z$ :  $[\text{M} + \text{H}]^+$  calculated for  $\text{C}_{12}\text{H}_{15}\text{N}_2\text{S}$ , 219.0950; found 219.0939.

### Compound **3ak**

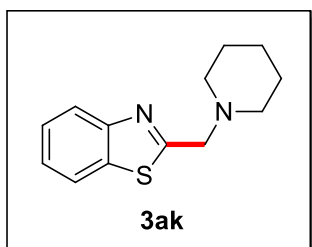

According to the general procedure, employing  $\text{Co}(\text{dmgH})_2(\text{DMAP})\text{Cl}$  as cobalt catalyst and increasing the amount of **2** to 0.6 mmol, **3ak** (white solid, 26.3 mg) was obtained by column chromatography with eluting (petroleum ether/ $\text{Et}_2\text{O}$  = 200/1) in 57% total yield with 57%  $\text{H}_2$  yield and 73%  $\text{CO}_2$  yield.

$^1\text{H}$  NMR (400 MHz,  $\text{CDCl}_3$ )  $\delta$  7.96 (d,  $J$  = 8.0 Hz, 1H), 7.87 (d,  $J$  = 8.0 Hz, 1H), 7.44 (t,  $J$  = 7.6 Hz, 1H), 7.35 (t,  $J$  = 7.6 Hz, 1H), 3.90 (s, 2H), 2.57 (br s, 4H), 1.64 (q,  $J$  = 5.2 Hz, 4H), 1.49–1.47 (m, 2H);  $^{13}\text{C}$  NMR (100 MHz,  $\text{CDCl}_3$ )  $\delta$  173.4, 153.3, 135.5, 125.7, 124.7, 122.7, 121.7, 61.0, 54.9 (2C), 26.0, 24.0 (2C); IR ( $\text{cm}^{-1}$ ):  $\nu$  3358, 3176, 2935, 2851, 1754, 1762, 1528, 1469, 1336, 1312, 1132, 1189, 855, 759, 730; HRMS:  $m/z$ :  $[\text{M} + \text{H}]^+$  calculated for  $\text{C}_{13}\text{H}_{17}\text{N}_2\text{S}$ , 233.1107; found 233.1103.

### Compound **3al**

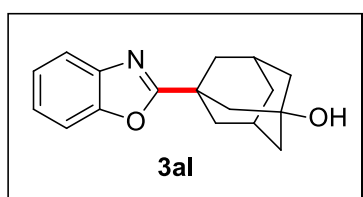

According to the general procedure, **3al** (white solid, 36.5 mg) was obtained by column chromatography with eluting (petroleum ether/ $\text{Et}_2\text{O}$  = 250/1) in 68% yield with 74%  $\text{H}_2$  yield and 77%  $\text{CO}_2$  yield.  $^1\text{H}$  NMR (400 MHz,  $\text{CDCl}_3$ )  $\delta$  7.72–7.68 (m, 1H), 7.51–7.47 (m, 1H), 7.32–7.28 (m, 2H), 2.38 (s, 2H), 2.13 (s, 2H), 2.10–2.02 (m, 4H), 1.82 (d,  $J$  = 2.8 Hz, 4H), 1.74–1.66 (m, 2H);  $^{13}\text{C}$  NMR (100 MHz,  $\text{CDCl}_3$ )  $\delta$  171.4, 150.5, 141.0, 124.5, 124.1, 119.7, 110.4, 68.2, 47.6, 44.2 (2C), 39.3, 39.0 (2C), 34.9, 30.3 (2C); HRMS:  $m/z$ :  $[\text{M} + \text{H}]^+$  calculated for  $\text{C}_{17}\text{H}_{20}\text{NO}_2$ , 270.1489; found 270.1466.

### Compound **3am**

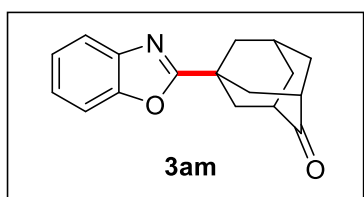

According to the general procedure, **3am** (white solid, 40.2 mg) was obtained by column chromatography with eluting (petroleum ether/ $\text{Et}_2\text{O}$  = 250/1) in 75% yield with 76%  $\text{H}_2$  yield and 72%  $\text{CO}_2$  yield.  $^1\text{H}$  NMR (400 MHz,  $\text{CDCl}_3$ )  $\delta$  7.72–7.68 (m, 1H), 7.52–7.48 (m, 1H), 7.35–7.30 (m, 2H), 2.72 (s, 2H), 2.48 (d,  $J$  = 2.4 Hz, 4H), 2.39 (s, 2H), 2.33–2.31 (m, 1H), 2.20–2.08 (m, 4H);  $^{13}\text{C}$

NMR (100 MHz, CDCl<sub>3</sub>)  $\delta$  216.2, 170.3, 150.5, 140.9, 124.8, 124.3, 119.8, 110.5, 45.8 (2C), 41.3 (2C), 39.3, 38.3 (2C), 35.7, 27.3; IR (cm<sup>-1</sup>):  $\nu$  3353, 3050, 2934, 2859, 1726, 1635, 1456, 1419, 1373, 1267, 1243, 1175, 1042, 930, 864, 747; HRMS:  $m/z$ : [M + H]<sup>+</sup> calculated for C<sub>17</sub>H<sub>18</sub>NO<sub>2</sub>, 268.1332; found 268.1337.

#### Compound **3an**<sup>9</sup>

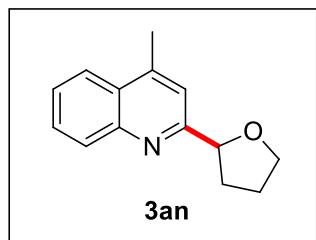

According to the general procedure, an increased amount of **2** (0.8 mmol) and reduced reaction time (22 h) were applied, **3an** (colorless oil, 35.4 mg) was obtained by column chromatography with eluting (petroleum ether/Et<sub>2</sub>O = 250/1) in 83% yield with 107% H<sub>2</sub> yield and 92% CO<sub>2</sub> yield. <sup>1</sup>H NMR (400 MHz, CDCl<sub>3</sub>)  $\delta$  8.05 (dd,  $J$  = 8.4 Hz,  $J$  = 0.4 Hz, 1H), 7.94 (dd,  $J$  = 8.4 Hz,  $J$  = 0.8 Hz, 1H), 7.68–7.64 (m, 1H), 7.52–7.47 (m, 1H), 7.43 (s, 1H), 5.14 (t,  $J$  = 7.2 Hz, 1H), 4.19–4.14 (m, 1H), 4.05–4.00 (m, 1H), 2.68 (s, 3H), 2.53–2.46 (m, 1H), 2.11–1.97 (m, 3H); <sup>13</sup>C NMR (100 MHz, CDCl<sub>3</sub>)  $\delta$  163.1, 147.3, 144.9, 129.6, 129.1, 127.4, 125.8, 123.7, 118.6, 82.1, 69.2, 33.3, 25.9, 18.9; MS:  $m/z$ : [M]<sup>+</sup>, 213.08.

#### Compound **3ao**<sup>10</sup>, **3ao'**<sup>10</sup>, **3ao''**<sup>11</sup>

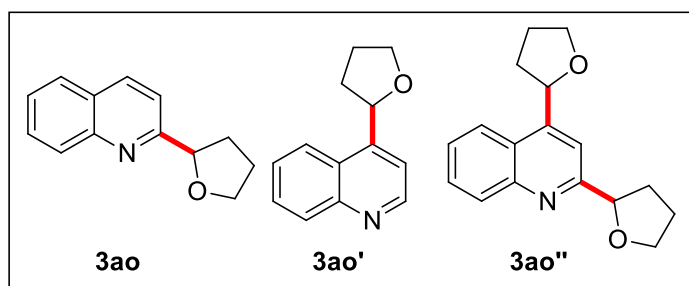

According to the general procedure, an increased amount of **2** (0.8 mmol) and reduced reaction time (22 h) were applied, **3ao** (colorless oil, 4.1 mg, 10%), **3ao'** (colorless oil, 15.8 mg, 40%) and **3ao''** (colorless oil, 2.1 mg, 4%) were obtained by column chromatography with eluting (petroleum ether/Et<sub>2</sub>O = 100/1) in 54% total yield with 70% H<sub>2</sub> yield and 90% CO<sub>2</sub> yield. **3ao**: <sup>1</sup>H NMR (400 MHz, CDCl<sub>3</sub>)  $\delta$  8.16 (d,  $J$  = 8.4 Hz, 1H), 8.06 (d,  $J$  = 8.4 Hz, 1H), 7.80 (d,  $J$  = 8.0 Hz, 1H), 7.70 (t,  $J$  = 7.2 Hz, 1H), 7.61 (d,  $J$  = 8.4 Hz, 1H), 7.51 (t,  $J$  = 7.2 Hz, 1H), 5.21–5.17 (m, 1H), 4.21–4.15 (m, 1H), 4.08–4.02 (m, 1H), 2.56–2.48 (m, 1H), 2.13–2.00 (m, 3H); <sup>13</sup>C NMR (100 MHz, CDCl<sub>3</sub>)  $\delta$  163.6, 147.5, 136.7, 129.4, 129.0, 127.6, 127.4, 126.1, 118.0, 82.1, 69.3, 33.4, 25.9; MS:  $m/z$ : [M]<sup>+</sup>, 119.14; **3ao'**: <sup>1</sup>H NMR (400 MHz, CDCl<sub>3</sub>)  $\delta$  8.89 (d,  $J$  = 4.4 Hz, 1H), 8.14 (d,  $J$  = 8.4 Hz, 1H), 7.92 (d,  $J$  = 8.4 Hz, 1H), 7.71 (t,  $J$  = 7.2 Hz, 1H), 7.58–7.55 (m, 2H), 5.63 (t,  $J$  = 7.2 Hz, 1H), 4.26–4.21 (m, 1H), 4.09–4.03 (m, 1H), 2.67–2.59 (m, 1H), 2.13–1.97 (m, 2H), 1.91–1.83 (m, 1H); <sup>13</sup>C NMR (100 MHz, CDCl<sub>3</sub>)  $\delta$  150.5, 149.4, 148.2, 130.3, 128.9, 126.3, 125.6, 123.2, 116.5, 76.7, 69.0, 33.9, 26.0; MS:  $m/z$ : [M]<sup>+</sup>, 119.11; **3ao''**: <sup>1</sup>H NMR (400 MHz, CDCl<sub>3</sub>)  $\delta$  8.09 (t,  $J$  = 7.2 Hz, 1H), 7.90 (t,  $J$  = 8.8 Hz, 1H), 7.74–7.66 (m, 2H), 7.51 (t,  $J$  = 7.6 Hz, 1H), 5.63–5.57 (m, 1H), 5.18–5.14 (m, 1H), 4.29–4.16 (m, 2H), 4.08–4.01 (m, 2H), 2.66–2.57 (m, 1H), 2.54–2.45 (m, 1H), 2.16–2.00 (m, 5H), 1.93–1.82 (m, 1H); MS:  $m/z$ : [M]<sup>+</sup>, 269.07.

## Mechanistic studies

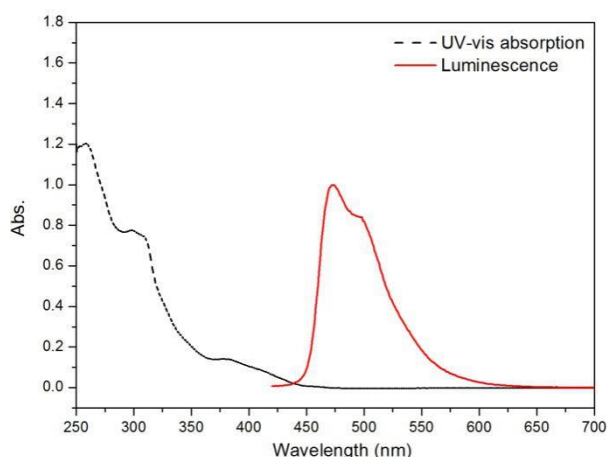

**Figure S3.** UV-vis absorption (left) and luminescence (right) spectra of Ir[dF(CF<sub>3</sub>)ppy]<sub>2</sub>(dtbbpy)PF<sub>6</sub> in degassed CH<sub>3</sub>CN/EtOAc.

### Radical Clock Experiments:

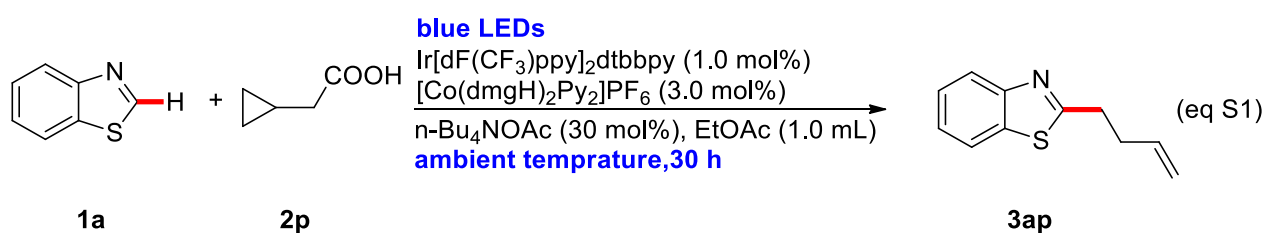

Substrate **1a** (0.20 mmol, 1.0 equiv), **2p** (0.2 mmol, 2.0 equiv), Ir[dF(CF<sub>3</sub>)ppy]<sub>2</sub>(dtbbpy)PF<sub>6</sub> (0.002 mmol, 1 mol%) and [Co(dmgh)<sub>2</sub>Py<sub>2</sub>](PF<sub>6</sub>) (0.006 mmol, 3 mol%) and n-Bu<sub>4</sub>NOAc (0.06 mmol, 30 mol%) were added into a 50 mL reaction tube. Then anhydrous EtOAc (1.0 mL) was added to the reaction tube via syringe in glove box. The reaction mixture was stirred for 30 h on Watecs Parallel Light Reactor at ambient temperature. **3ap**: yellow liquid. <sup>1</sup>H NMR (400 MHz, CDCl<sub>3</sub>): δ 7.98 (d, *J* = 8.0 Hz, 1H), 7.85 (d, *J* = 7.6 Hz, 1H), 7.48–7.44 (m, 1H), 7.38–7.33 (m, 1H), 5.95–5.88 (m, 1H), 5.14 (dd, *J* = 17.2 Hz, *J* = 1.6 Hz, 1H), 5.06 (dd, *J* = 10.0 Hz, *J* = 1.2 Hz, 1H), 3.22 (t, *J* = 8.0 Hz, 2H), 2.68–2.62 (m, 2H); <sup>13</sup>C NMR (100 MHz, CDCl<sub>3</sub>): δ 171.2, 153.2, 136.4, 135.2, 125.9, 124.7, 122.6, 121.5, 116.2, 33.7, 33.4; MS: *m/z*: [M]<sup>+</sup>, 189.10.

### Quantum yield measurements:

#### Determination the light intensity at 402 nm:

According to the procedure of Yoon,<sup>12</sup> the photon flux of the spectrophotometer was determined by standard ferrioxalate actinometry.<sup>13</sup> A 0.15 M solution of ferrioxalate was prepared by dissolving potassium ferrioxalate hydrate (1.47 g) in H<sub>2</sub>SO<sub>4</sub> (20 mL of a 0.05 M solution). A buffered solution of 1,

10-phenanthroline was prepared by dissolving phenanthroline (25 mg) and sodium acetate (5.63 g) in H<sub>2</sub>SO<sub>4</sub> (25 mL of a 0.5 M solution). Both solutions were stored in the dark. To determine the photon flux of the spectrophotometer, the ferrioxalate solution (2.0 mL) was placed in a cuvette and irradiated for 90 seconds at  $\lambda = 402$  nm. After irradiation, the phenanthroline solution (0.35 mL) was added to the cuvette and the mixture was allowed to rest in the dark for 1 hour to allow the ferrous ions to completely coordinate to the phenanthroline. The absorbance of the solution was measured at 510 nm. A non-irradiated sample was also prepared and the absorbance at 510 nm was measured. Conversion was calculated using eq S2.

$$\text{mol Fe}^{2+} = \frac{V \cdot \Delta A}{l \cdot \epsilon} = \frac{0.00235 \text{ L} \cdot 1.884}{1.000 \text{ cm} \cdot 11,100 \text{ L} \cdot \text{mol}^{-1} \text{ cm}^{-1}} = 3.99 \times 10^{-7} \text{ mol} \quad (\text{eq S2})$$

Where V is the total volume (0.00235 L) of the solution after addition of phenanthroline,  $\Delta A$  is the difference in absorbance at 510 nm between the irradiated and non-irradiated solutions, l is the path length (1.000 cm), and  $\epsilon$  is the molar absorptivity at 510 nm (11,100 L mol<sup>-1</sup>cm<sup>-1</sup>). The photon flux can be calculated using eq S3.

$$\text{Photon flux} = \frac{\text{mol Fe}^{2+}}{\Phi \cdot t \cdot f} = \frac{3.99 \times 10^{-7} \text{ mol}}{1.07 \cdot 90.0 \text{ s} \cdot 0.99356} = 4.17 \times 10^{-9} \text{ einstein s}^{-1} \quad (\text{eq S3})$$

Where  $\Phi$  is the quantum yield for the ferrioxalate actinometer (1.07 for a 0.15 M solution at  $\lambda = 402$  nm), t is the time (90.0 s), and f is the fraction of light absorbed at  $\lambda = 402$  nm (eq S4).

#### **Determination of fraction of light absorbed at 450 nm for the ferrioxalate solution:**

The fraction of light absorbed (f) by this solution was calculated using eq S4, where A is the measured absorbance of the above ferrioxalate solution at 402 nm which was measured to be 2.1909 (Figure S4), indicating the fraction of light absorbed (f) is 0.99356. Finally, the photon flux was calculated to be  $4.17 \times 10^{-9}$  einstein s<sup>-1</sup>.

$$f = 1 - 10^{-A} = 0.98280 \quad (\text{eq S4})$$

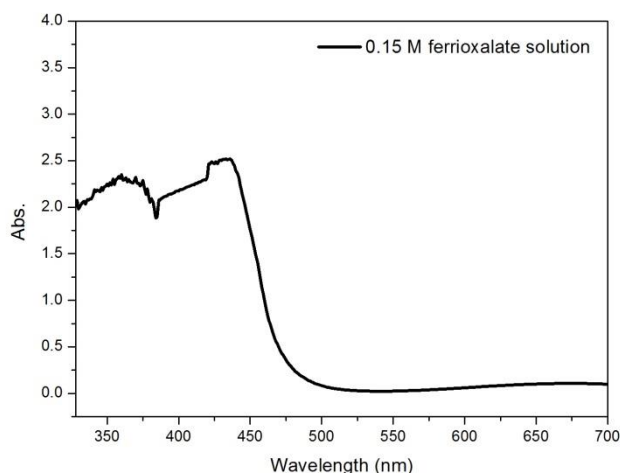

**Figure S4.** UV-vis spectrum of 0.15 M ferrioxalate solution.

#### Quantum yield calculation:

A cuvette was charged with **1a** (0.2 mmol), **2a** (0.4 mmol), Ir[dF(CF<sub>3</sub>)ppy]<sub>2</sub>(dtbbpy)PF<sub>6</sub> (0.002 mmol), [Co(dmgH)<sub>2</sub>Py<sub>2</sub>](PF<sub>6</sub>) (0.006 mmol), n-Bu<sub>4</sub>NOAc (0.06 mmol), and 1.0 mL degassed EtOAc in glovebox under Ar atmosphere. The cuvette was then capped with a PTFE stopper. The sample was irradiated ( $\lambda$  = 402 nm, slit width = 10.0 nm) for 27,000 s (7.5 h). After irradiation, the yield of product formed was determined by <sup>1</sup>H NMR to be 24% using 1,1,2,2-tetrachloroethane as an internal standard. The quantum yield was determined using eq S5.

$$\Phi = \frac{\text{mol prod}}{\text{flux} \cdot t \cdot f} = \frac{0.24 \times 0.2 \times 10^{-3} \text{ mol}}{4.17 \times 10^{-9} \text{ einstein s}^{-1} \cdot 27,000 \text{ s} \cdot 0.99404} = 0.43 \quad (\text{eq S5})$$

The quantum yield  $\Phi$  for the reaction was calculated to be 0.43.

#### Absorbance of catalyst:

The absorbance of Ir[dF(CF<sub>3</sub>)ppy]<sub>2</sub>(dtbbpy)PF<sub>6</sub> in EtOAc was measured at the reaction concentration of  $2 \times 10^{-3}$  M (Figure S5). The absorbance at 402 nm is 2.2247, indicating the fraction of light absorbed (f) is 0.99404.

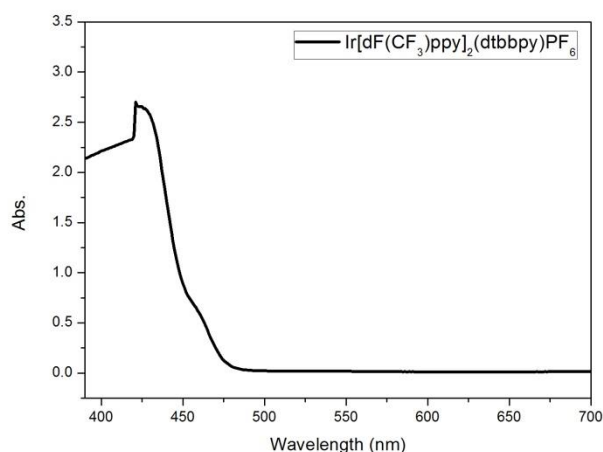

**Figure S5.** UV-vis absorption of  $2 \times 10^{-3}$  M  $\text{Ir}[\text{dF}(\text{CF}_3)\text{ppy}]_2(\text{dtbbpy})\text{PF}_6$ .

### Emission Quenching Experiments:

Emission intensities were recorded using a spectrofluorimeter. All  $\text{Ir}[\text{dF}(\text{CF}_3)\text{ppy}]_2(\text{dtbbpy})\text{PF}_6$  solutions were excited at 402 nm and the emission intensity at 472 nm was observed. A mixture solvent of EtOAc/ $\text{CH}_3\text{CN}$  (1:1) was selected as solvent, and the solvent was degassed with a stream of argon for 30 min. In a typical experiment, the emission spectrum of the sample was collected after the sample was degassed with a stream of argon for 15 minutes. First, the emission spectrum of a  $2.5 \times 10^{-5}$  M solution of  $\text{Ir}[\text{dF}(\text{CF}_3)\text{ppy}]_2(\text{dtbbpy})\text{PF}_6$  in EtOAc/ $\text{CH}_3\text{CN}$  (1:1) was collected. Then, appropriate amount of quencher was added to the measured solution and the emission spectrum of the sample was collected.

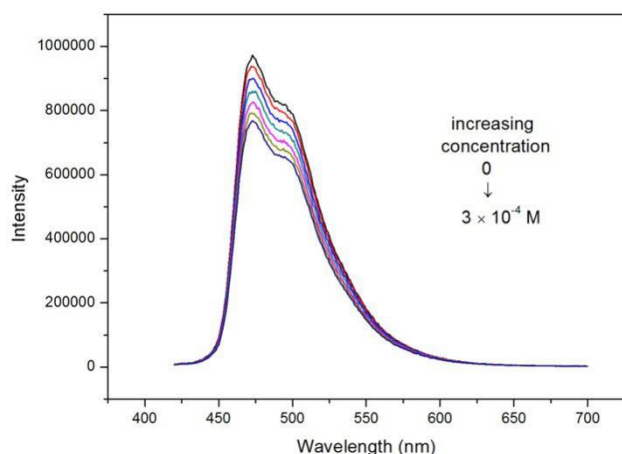

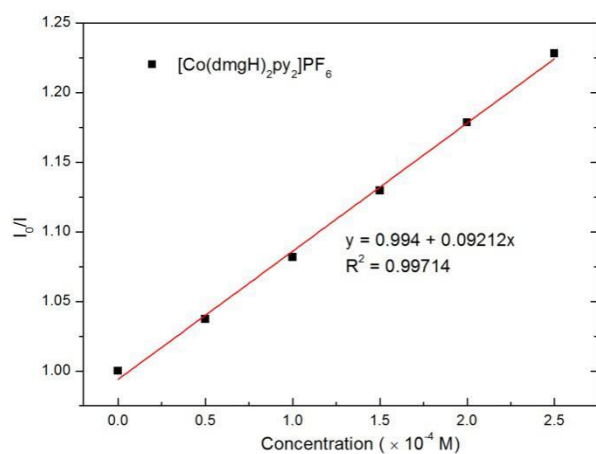

**Figure S6.**  $\text{Ir}[\text{dF}(\text{CF}_3)\text{ppy}]_2(\text{dtbbpy})\text{PF}_6$  emission quenching by  $[\text{Co}(\text{dmgh})_2\text{Py}_2]\text{PF}_6$ .

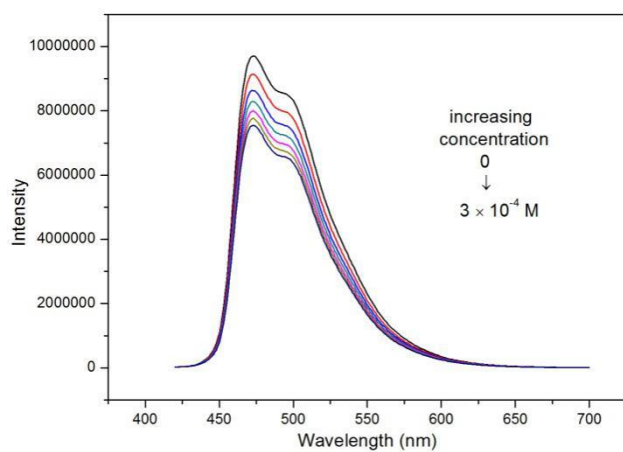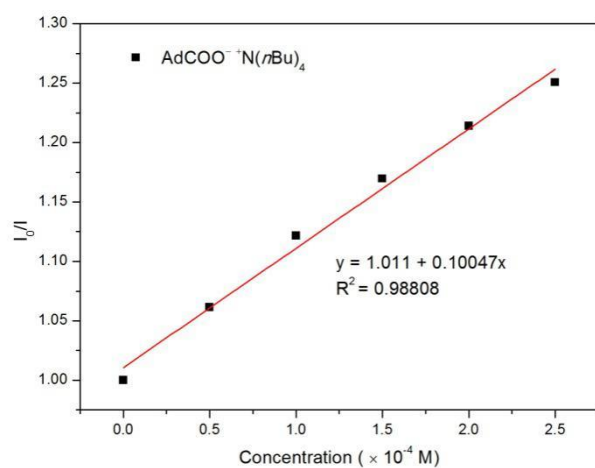

**Figure S7.**  $\text{Ir}[\text{dF}(\text{CF}_3)\text{ppy}]_2(\text{dtbbpy})\text{PF}_6$  emission quenching by  $\text{AdCO}_2\text{N}(\text{n-Bu})_4$ .

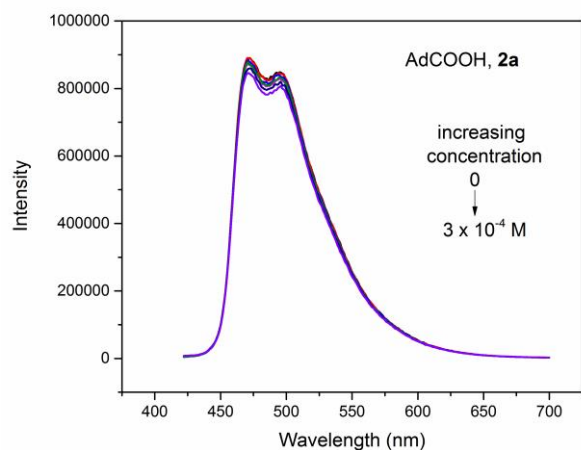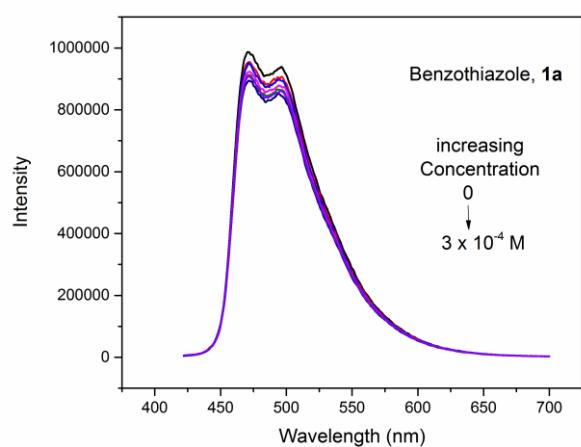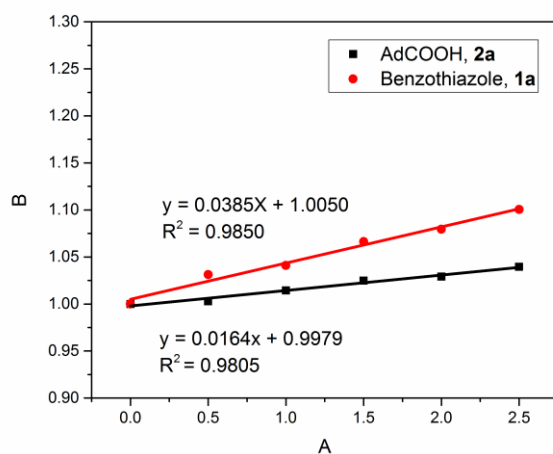

**Figure S8.** Ir[dF(CF<sub>3</sub>)ppy]<sub>2</sub>(dtbbpy)PF<sub>6</sub> emission quenching by **2a** and **1a**.

### Cyclic Voltammetry (CV) Experiments:

As the solvent of EtOAc failed undergoing cyclic voltammetry experiments and considering that CH<sub>3</sub>CN displays the widest detection window for the reduction oxidation potentials,<sup>14</sup> and the most reported



electrochemical data were detected in CH<sub>3</sub>CN.<sup>15</sup> Meanwhile, 43% yield of product was obtained in the mixture solvent of EtOAc/CH<sub>3</sub>CN (1:1) in our work (Table 1, entry 19). Thus the reduction oxidation potentials of **1a**, **2a**, AdCOON(n-Bu)<sub>4</sub>, Ir[dF(CF<sub>3</sub>)ppy]<sub>2</sub>(dtbbpy)PF<sub>6</sub> and the cobalt were detected in the mixture solvent of EtOAc/CH<sub>3</sub>CN (1:1).

For the electrochemical measurements a three-electrode system connected to an electrochemical station was used. The reference electrode, Ag/AgNO<sub>3</sub> in 0.1 M AgNO<sub>3</sub>, was calibrated versus Fc<sup>+</sup>/Fc<sup>0</sup> using the same experimental conditions as for the sample. A glassy carbon electrode was used as working electrode. And a Pt wire was used as counter electrode. All electrochemical measurements were performed in EtOAc/CH<sub>3</sub>CN under dry argon atmosphere.

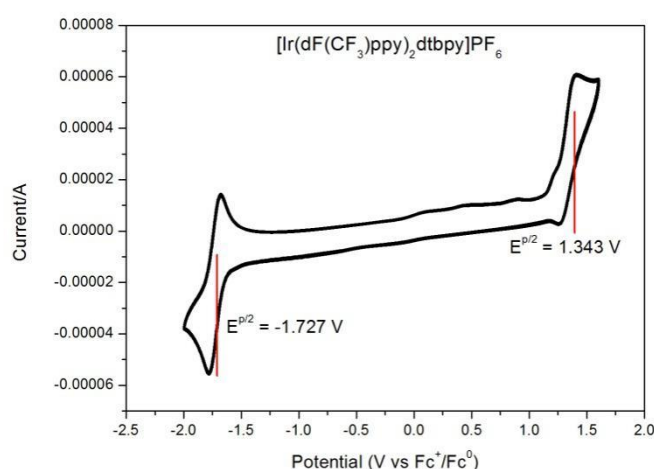

**Figure S9.** Cyclic voltammogram (CV) of 3 mM Ir[dF(CF<sub>3</sub>)ppy]<sub>2</sub>(dtbbpy)PF<sub>6</sub> in 0.1 M nBu<sub>4</sub>PF<sub>6</sub> EtOAc/CH<sub>3</sub>CN (1:1) solution under Ar. Conditions: working electrode: glassy carbon electrode; reference electrode: Ag<sup>+</sup>/Ag; scan rate = 100 mV/s. E<sub>p/2</sub><sup>Ir(III)/Ir(IV)</sup> = + 1.74 V vs. SCE, E<sub>p/2</sub><sup>Ir(II)/Ir(III)</sup> = - 1.33 V vs. SCE.

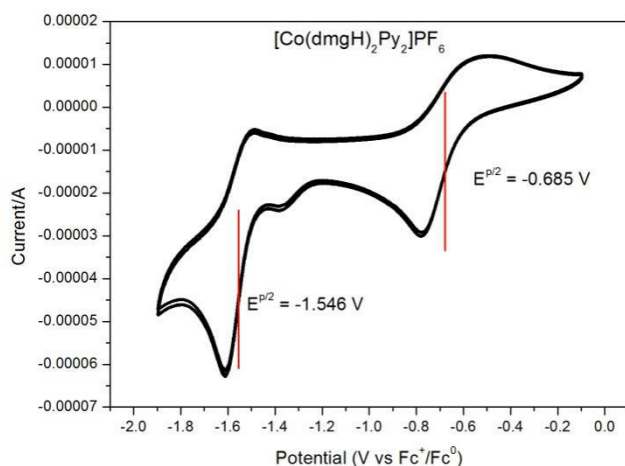

**Figure S10.** Cyclic voltammogram (CV) of 1 mM  $[\text{Co}(\text{dmgh})_2\text{Py}_2]\text{PF}_6$  in 0.1 M  $\text{nBu}_4\text{PF}_6$  EtOAc/ $\text{CH}_3\text{CN}$  (1:1) solution under Ar. Conditions: working electrode: glassy carbon electrode; reference electrode:  $\text{Ag}^+/\text{Ag}$ ; scan rate = 100 mV/s.  $E_{\text{p}/2}^{\text{Co(III)/Co(II)}} = -0.29$  V vs. SCE,  $E_{\text{p}/2}^{\text{Co(II)/Co(I)}} = -1.15$  V vs. SCE.

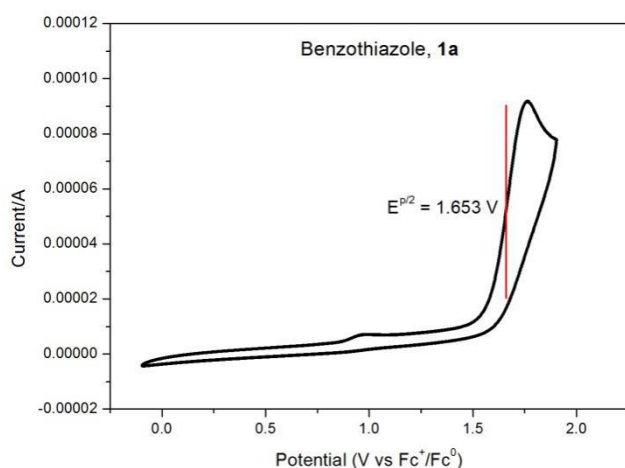

**Figure S11.** Cyclic voltammogram (CV) of 3 mM **1a** in 0.1 M  $\text{nBu}_4\text{PF}_6$  EtOAc/ $\text{CH}_3\text{CN}$  (1:1) solution under Ar. Conditions: working electrode: glassy carbon electrode; reference electrode:  $\text{Ag}^+/\text{Ag}$ ; scan rate = 100 mV/s.  $E_{\text{p}/2}^{\text{1a}^+/\text{1a}} = +2.05$  V vs. SCE.

### Preparation of $\text{AdCO}_2\text{nBu}_4\text{N}$

A mixture of  $\text{AdCOOH}$  (**2a**, 2 mmol, 1.0 equiv) and 40 wt% tetrabutylammonium hydroxide (TBA) MeOH solution (1.0 equiv) was stirred at room temperature for 4 h. The solvent was then evaporated in vacuo. The resulting product was dried under high vacuum and stored in glovebox.  $^1\text{H}$  NMR (400 MHz,  $\text{D}_2\text{O}$ )  $\delta$  3.20–3.15 (m, 8H), 1.94 (s, 3H), 1.77 (d,  $J = 2.4$  Hz, 6H), 1.71–1.59 (m, 14H), 1.38–1.29 (m, 8H), 0.93 (t,  $J = 7.2$  Hz, 12H);  $^{13}\text{C}$  NMR (100 MHz,  $\text{D}_2\text{O}$ )  $\delta$  58.1 (4C), 42.1, 39.5 (3C), 36.2 (3C), 28.1 (3C), 23.1 (4C), 19.1 (4C), 12.8 (4C).

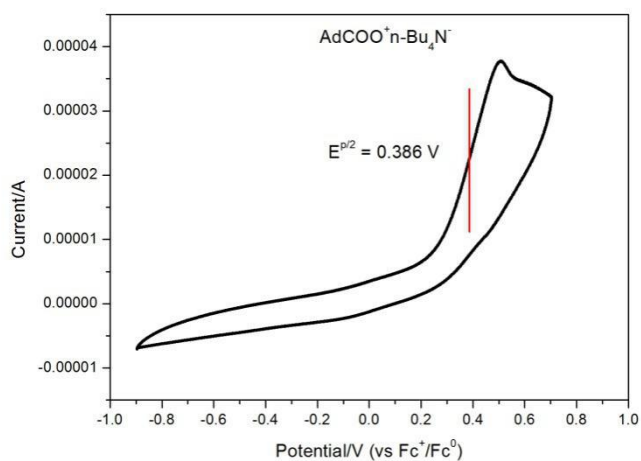

**Figure S12.** Cyclic voltammogram (CV) of 3 mM  $\text{AdCO}_2n\text{-Bu}_4\text{N}$  in 0.1 M  $\text{nBu}_4\text{PF}_6$  EtOAc/ $\text{CH}_3\text{CN}$  (1:1) solution under Ar. Conditions: working electrode: glassy carbon electrode; reference electrode:  $\text{Ag}^+/\text{Ag}$ ; scan rate = 100 mV/s.  $E_{\text{p}/2}^{\text{AdCOO}^\bullet/\text{AdCOO}^-} = +0.79$  V vs. SCE.

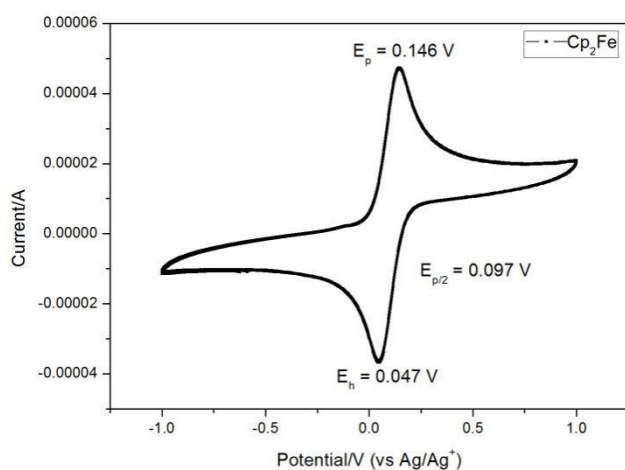

**Figure S13.** CV spectra of 3 mM  $\text{Cp}_2\text{Fe}$  in 0.1 M  $\text{nBu}_4\text{PF}_6$  in degassed EtOAc/ $\text{CH}_3\text{CN}$  with scan rate 100 mV/s.

## References

- (1). Du, P.; Schneider, J.; Luo, G.; Brennessel, W. W.; Eisenberg, R. *Inorg. Chem.* **2009**, *48*, 4952-4962.
- (2) Tian, W. F.; Wang, D. P.; Wang, S. F.; He, K. H.; Cao, X. P.; Li, Y. *Org. Lett.* **2018**, *20*, 1421-1425.
- (3) (a) Tlahuext-Aca, A.; Candish, L.; Garza-Sanchez, R. A.; Glorius, F. *ACS Catal.* **2018**, *8*, 1715-1719; (b) Sun, X.; Chen, J.; Ritter, T. *Nat. chem.* **2018**, *10*, 1229-1233; (c) Cartwright, K. C.; Tunge, J. A. *ACS Catal.* **2018**, *8*, 11801-11806.
- (4) Zhao, W. M.; Chen, X. L.; Yuan, J. W.; Qu, L. B.; Duan, L. K.; Zhao, Y. F. *Chem. Commun.* **2014**, *50*, 2018-2020.
- (5) Wang, B.; Li, P.; Miao, T.; Zou, L.; Wang, L. *Org. Biomol. Chem.* **2018**, *17*, 115-121.
- (6) Ackermann, L.; Koeller, J.; Gandeepan, P. *Synthesis* **2018**, *51*, 1284-1292.
- (7) Wu, X.; See, J. W. T.; Xu, K.; Hirao, H.; Roger, J.; Hierso, J.; Zhou, J. R. *Angew. Chem. Int. Ed.* **2014**, *53*, 13573-13577.
- (8) He, T.; Yu, L.; Zhang, L.; Wang, L.; Wang, M. *Org. Lett.* **2011**, *13*, 5016-5019.
- (9) Garza-Sanchez, R. A.; Tlahuext-Aca, A.; Tavakoli, G.; Glorius, F. *ACS Catal.* **2017**, *7*, 4057-4061.
- (10) Ambala, S.; Thatikonda, T.; Sharma, S.; Munagala, G.; Yempalla, K. R.; Vishwakarma, R. A.; Singh, P. P. *Org. Biomol. Chem.* **2015**, *13*, 11341-11350.
- (11) Liu, S.; Liu, A.; Zhang, Y.; Wang, W. *Chem. Sci.* **2017**, *8*, 4044-4050.
- (12) Cismesia, M. A.; Yoon, T. P. *Chem. Sci.* **2015**, *6*, 5426-5434.
- (13) (a) Hatchard, C. G.; Parker, C. A. *Proc. Roy. Soc. (London)*, **1956**, *A23*, 518; (b) Kuhn, H. J.; Braslavsky, S. E.; Schmidt, R. Chemical Actinometry. *Pure Appl. Chem.* **1989**, *61*, 2105-2146.
- (14) Zoski, C.G. *Handbook of Electrochemistry, 1st ed., Elsevier, Amsterdam*, **2007**. p. 63.
- (15) (a) Prier, C. K.; Rankic, D. A.; MacMillan, D. W. *Chem. Rev.* **2013**, *113*, 5322-5363; (b) Nicewicz, D.; Roth, H.; Romero, N. *Synlett* **2015**, *27*, 714-723.

# Spectrum

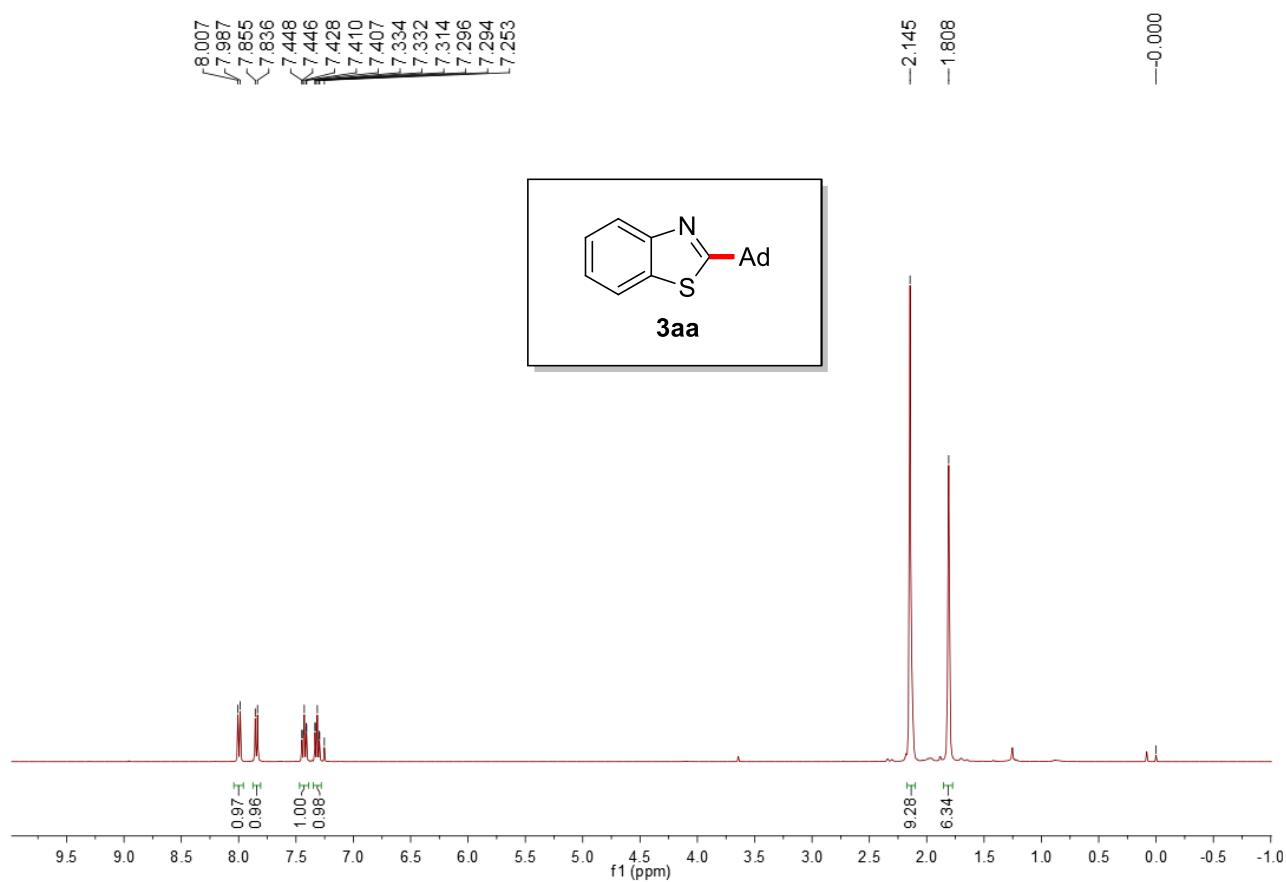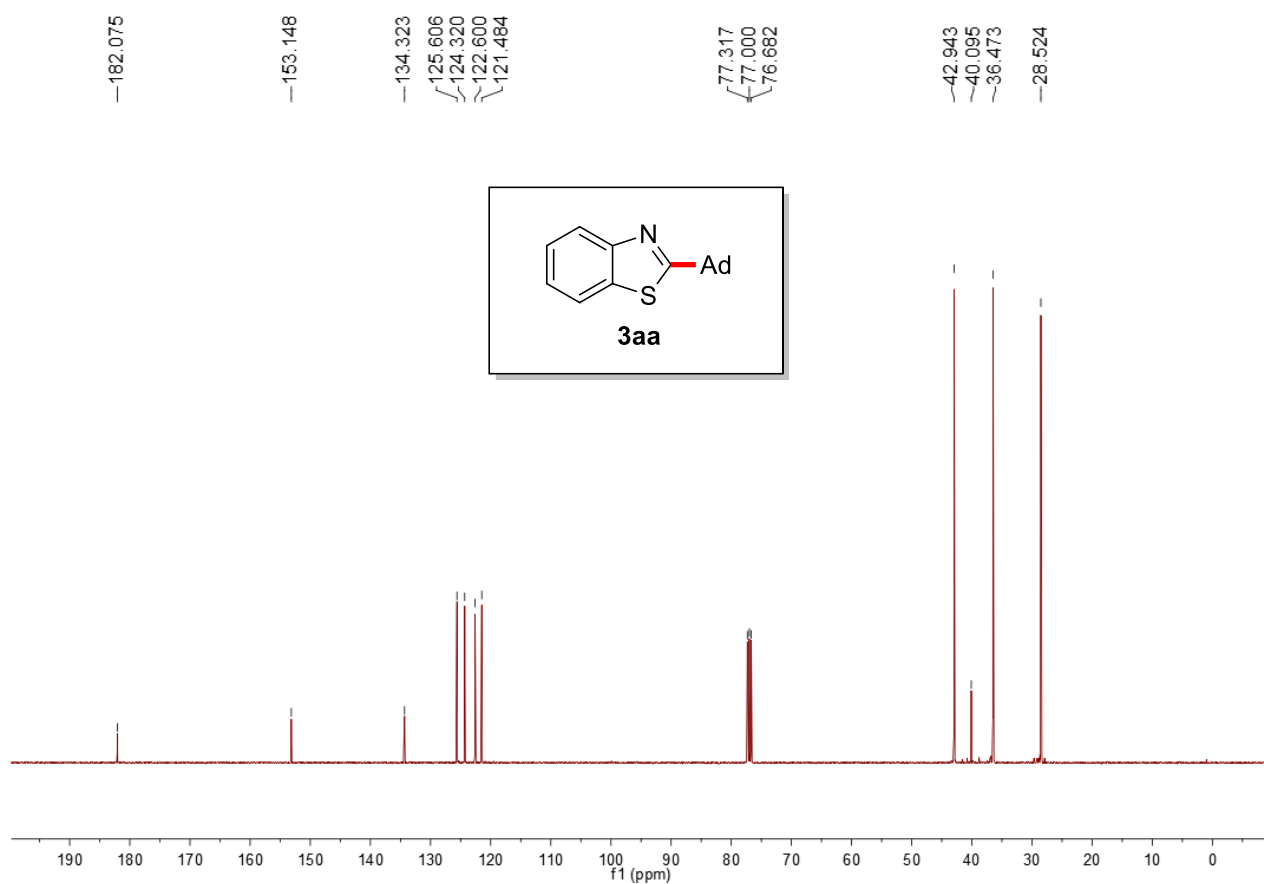

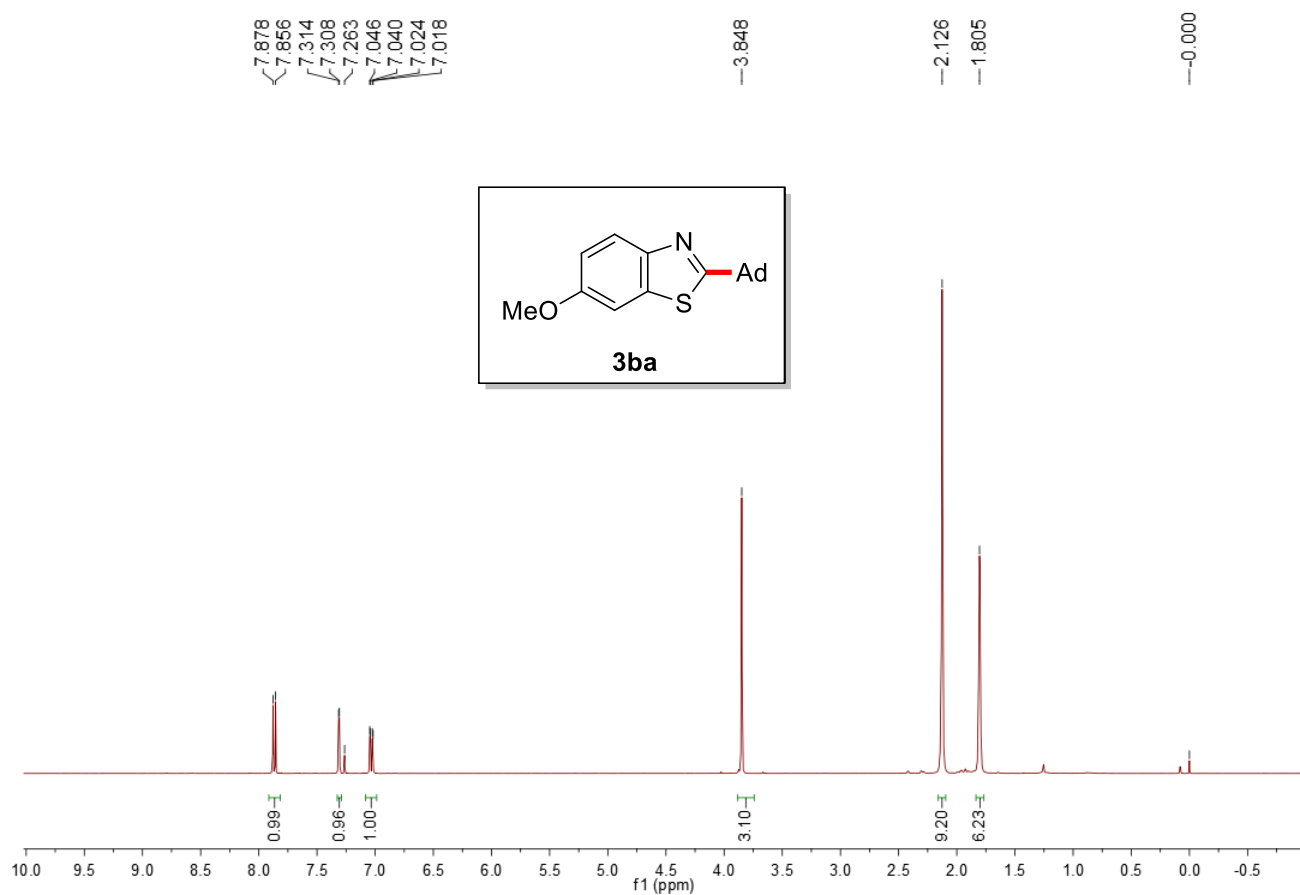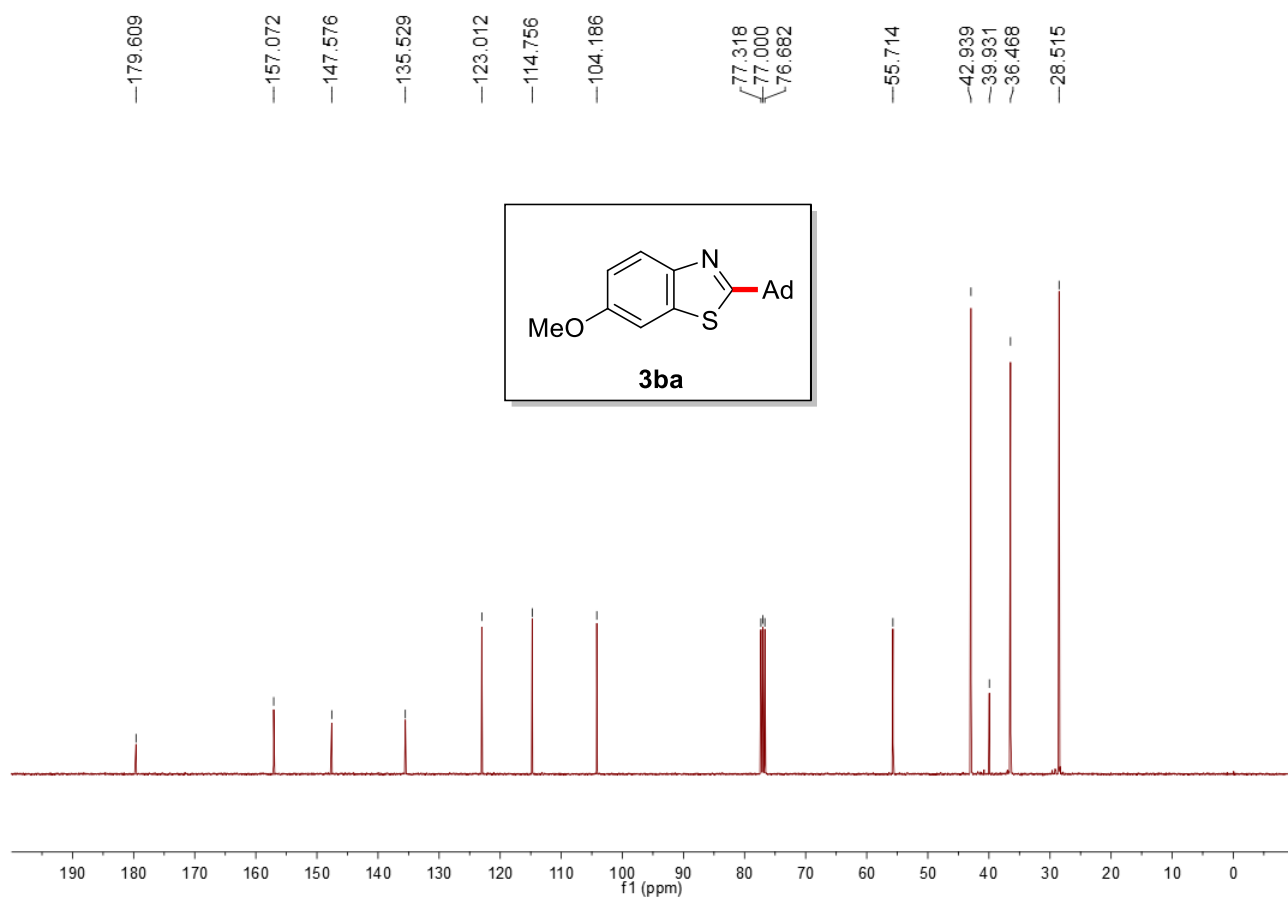

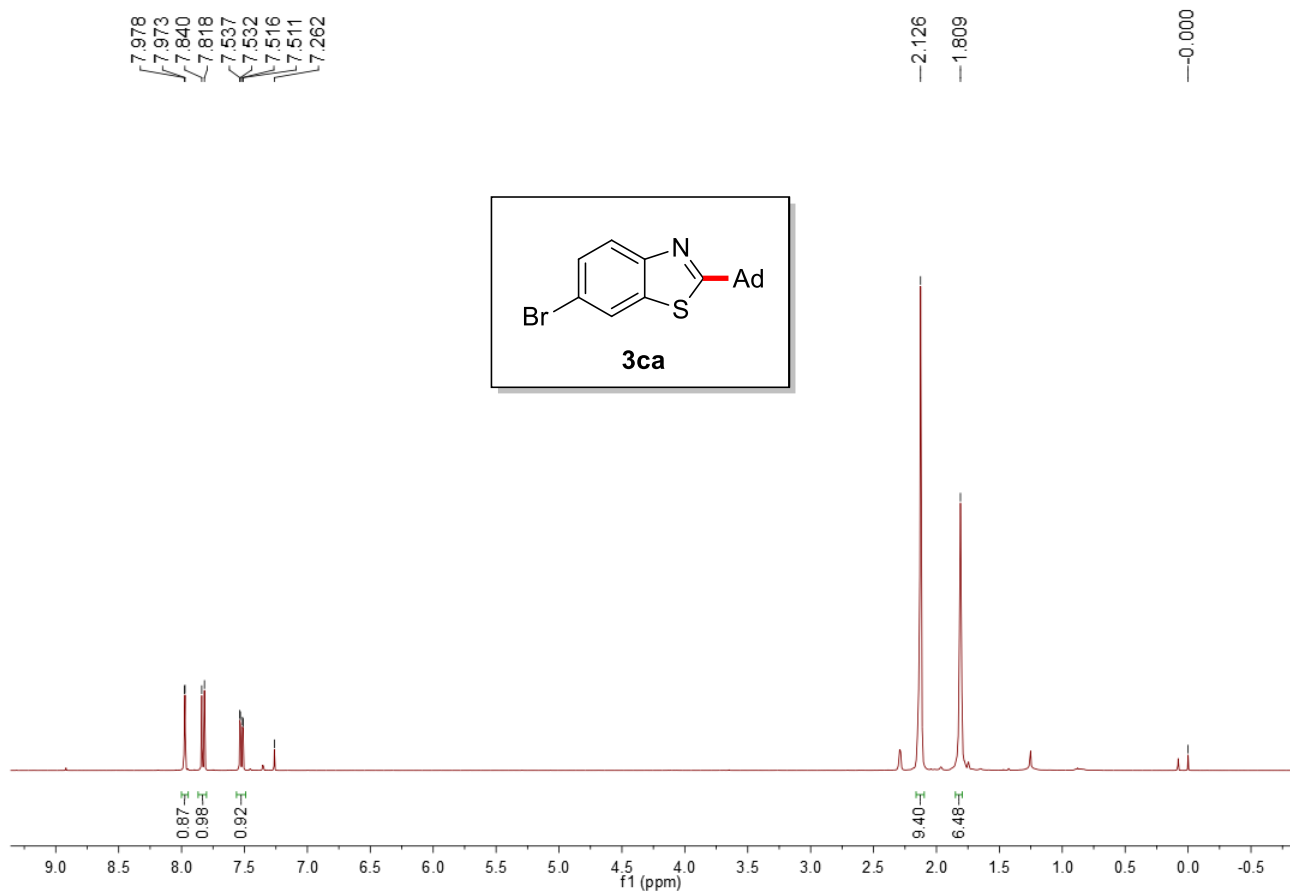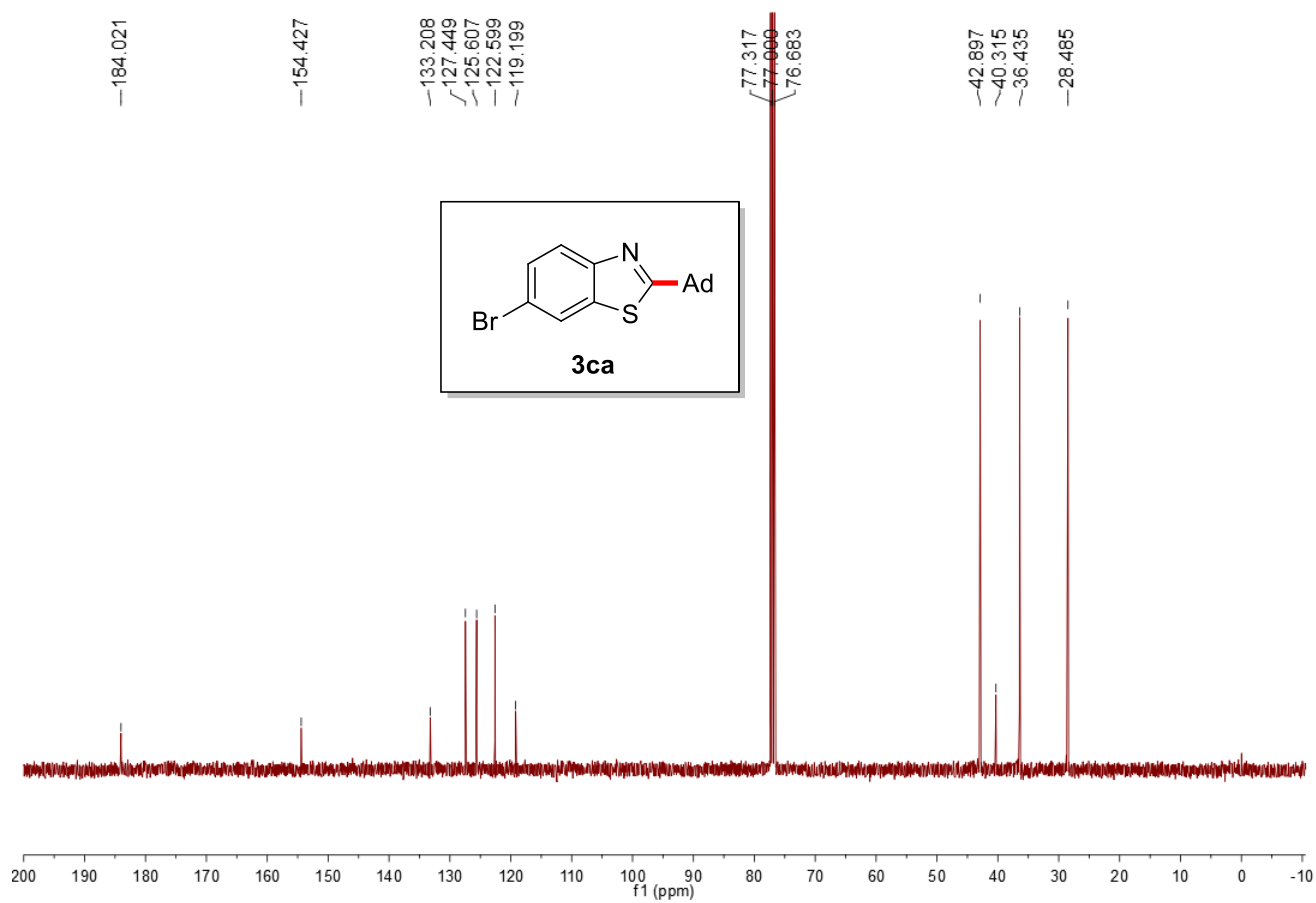

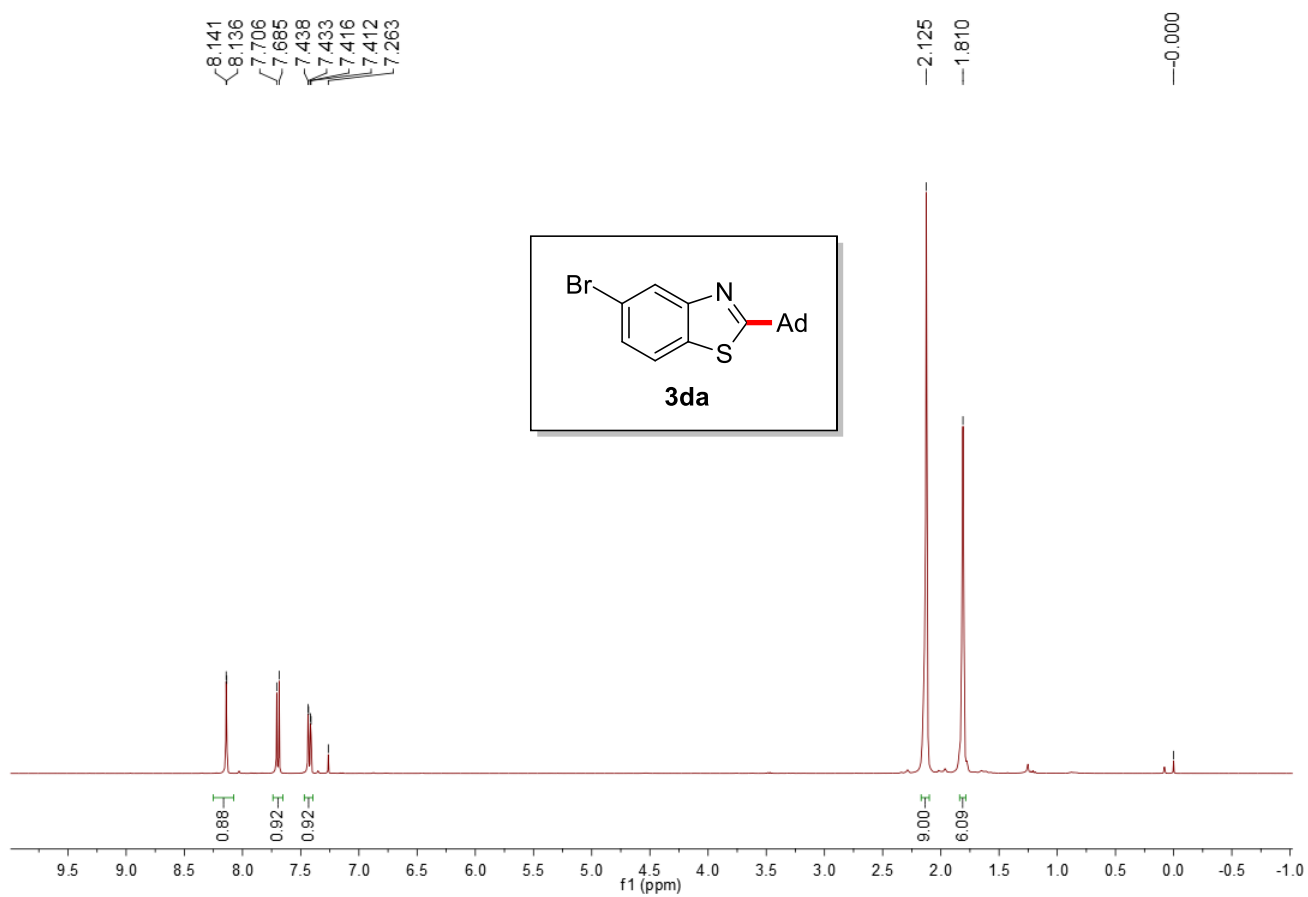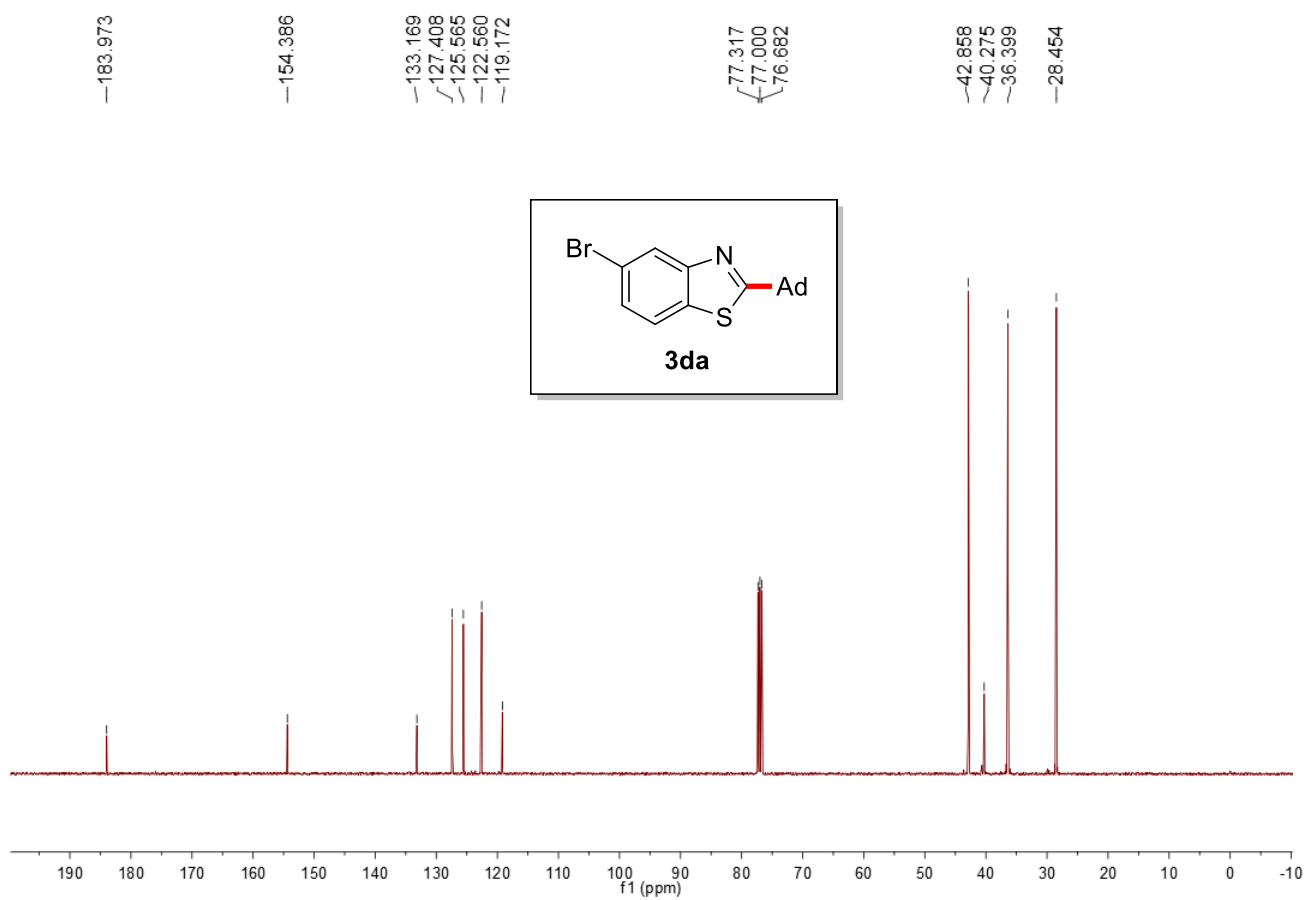



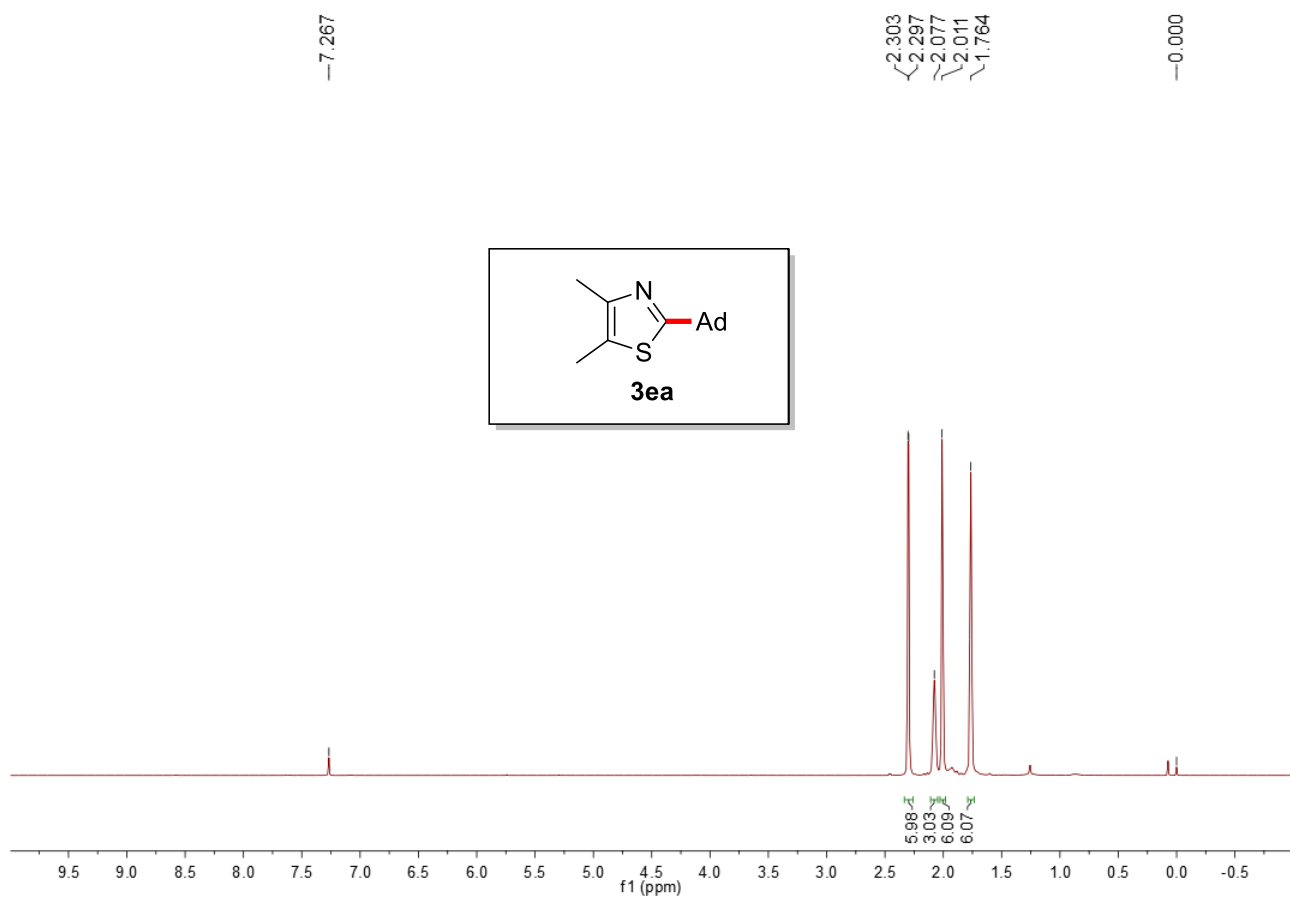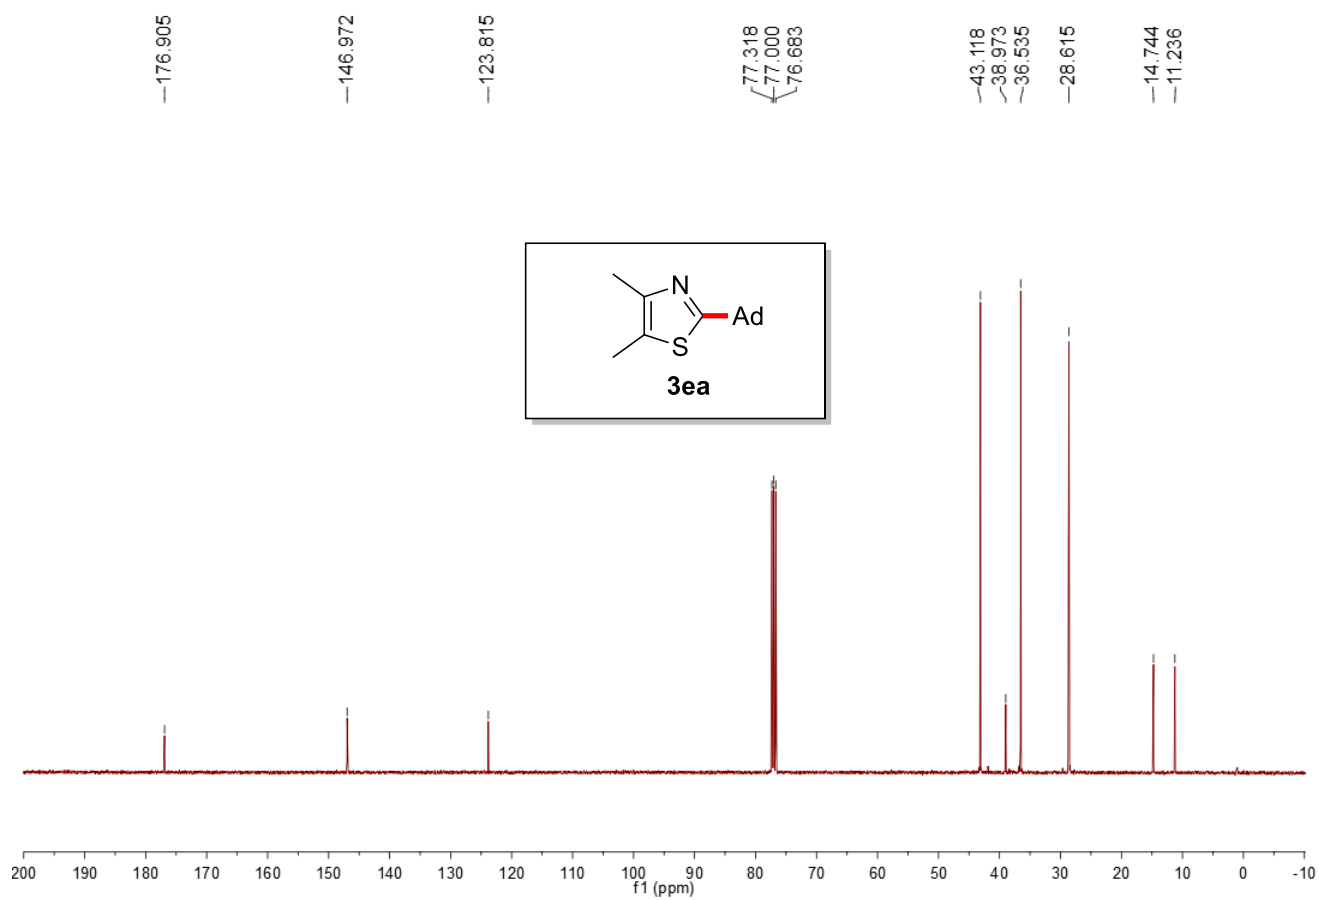

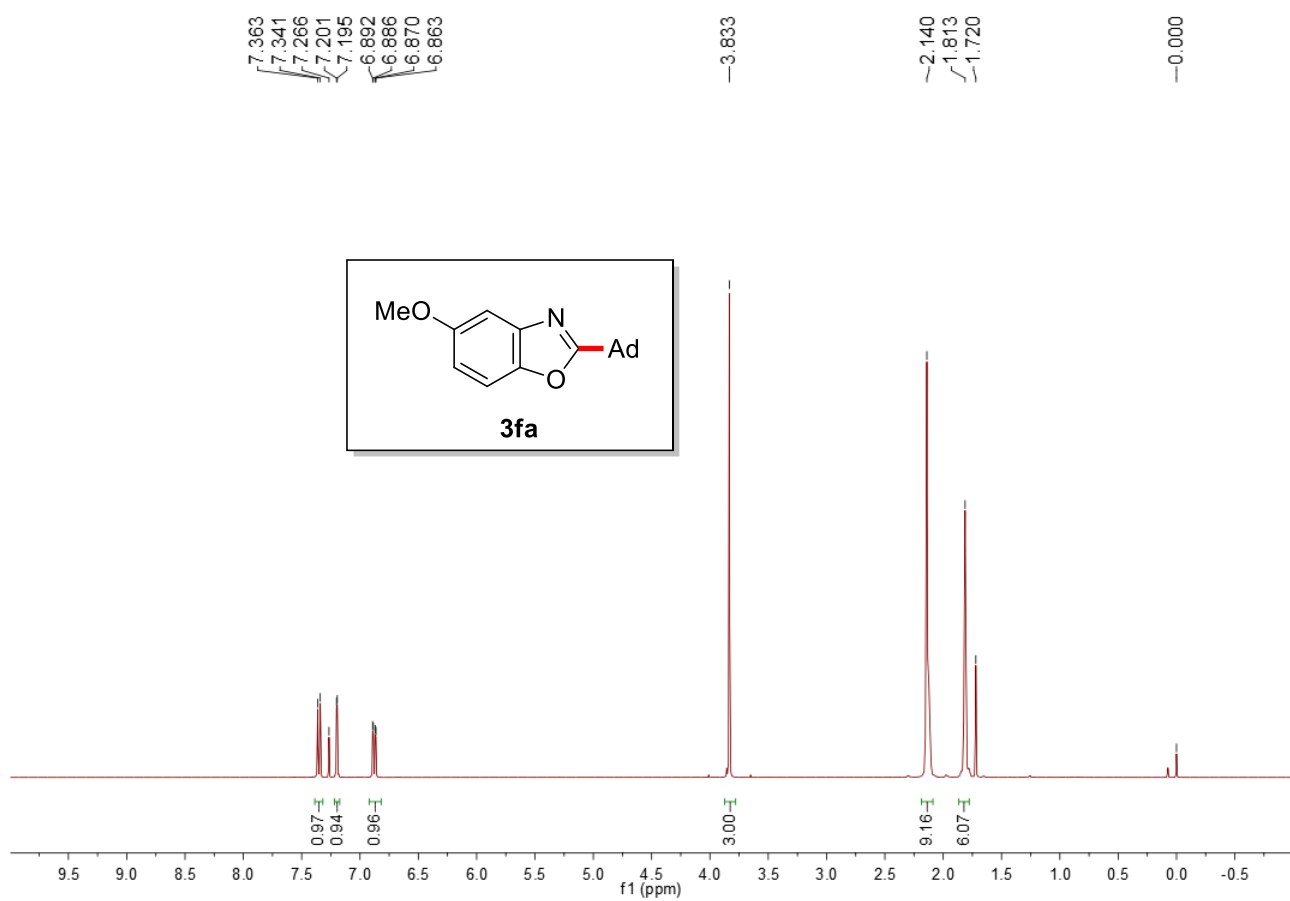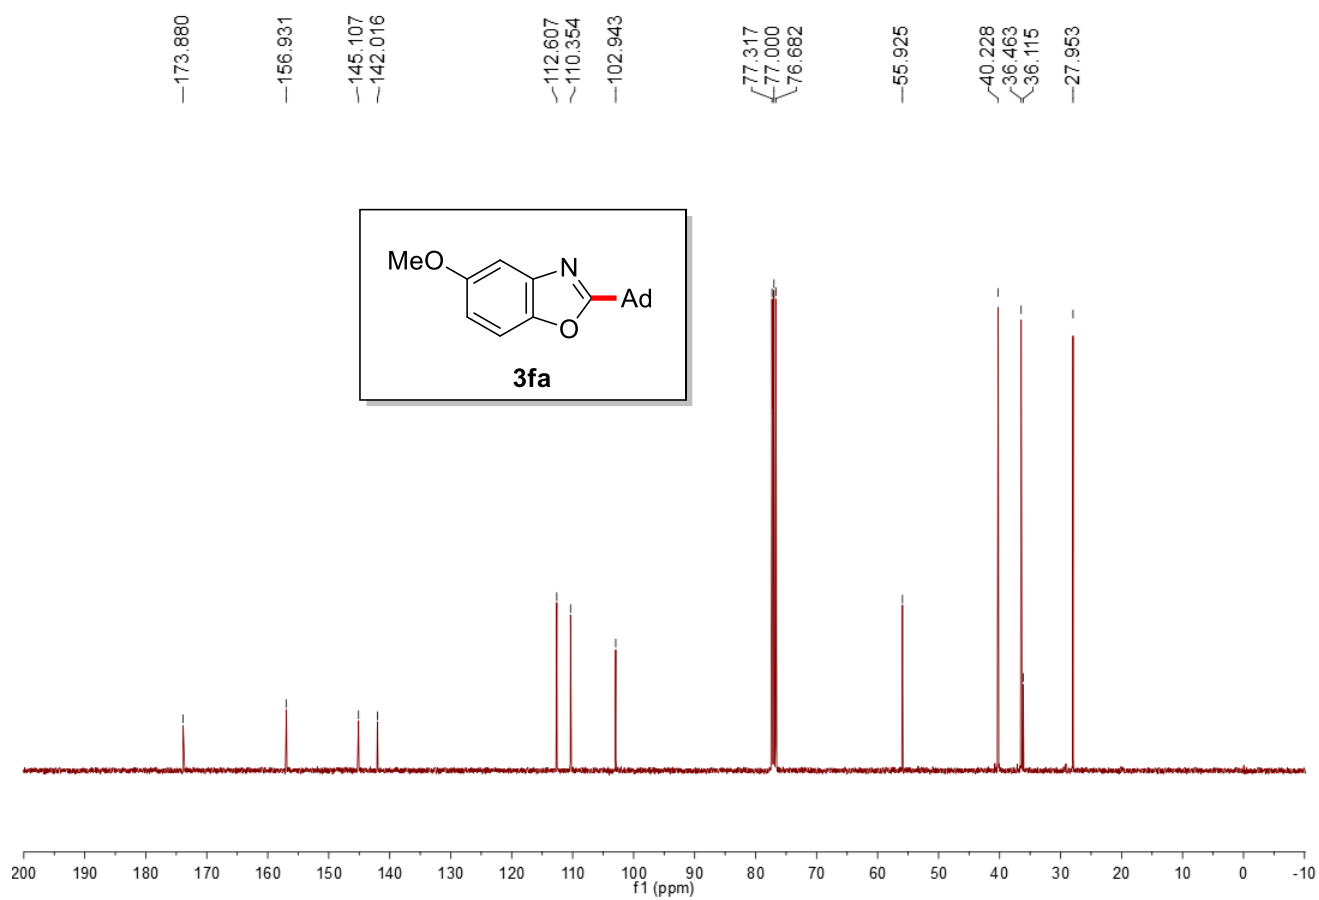

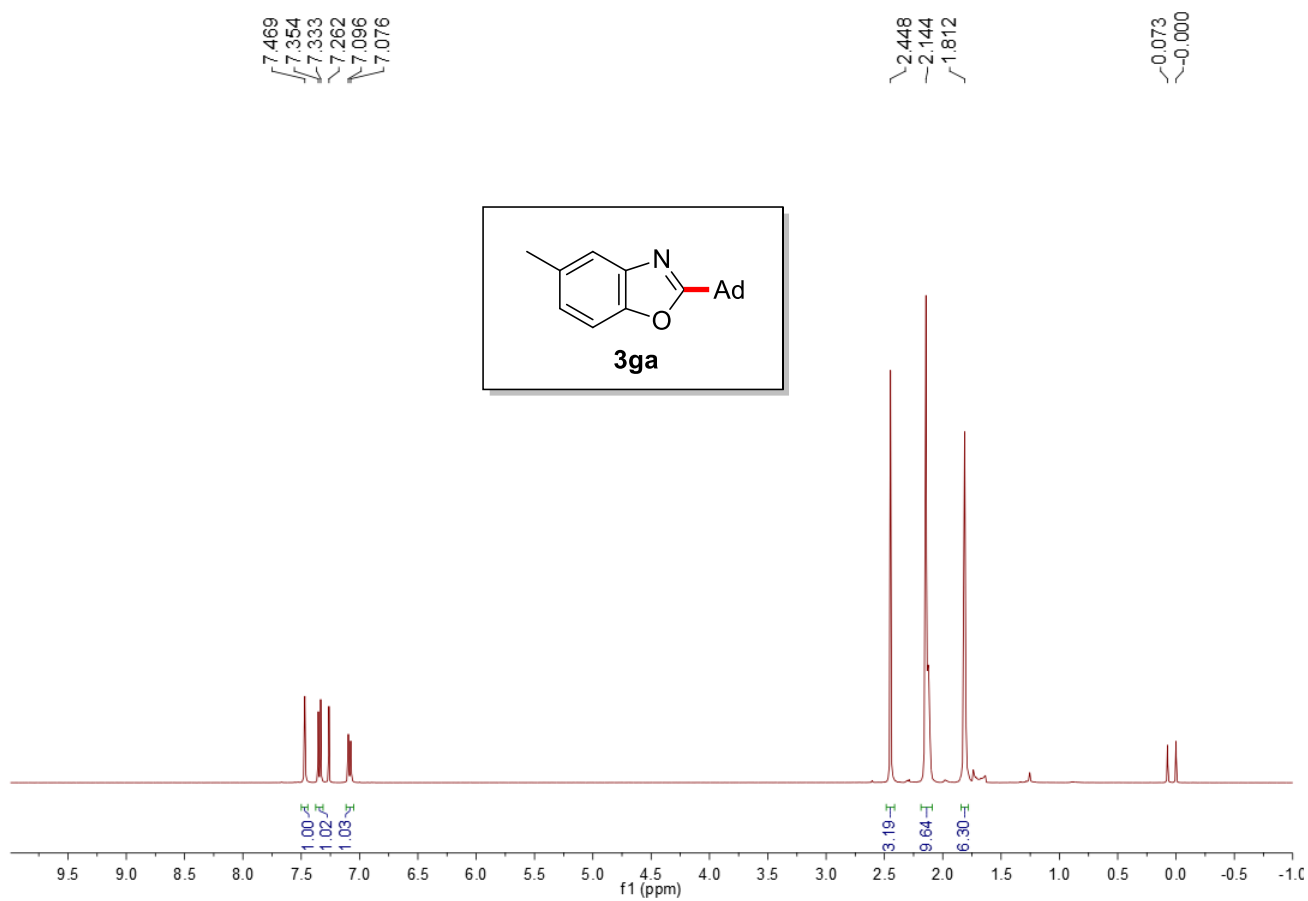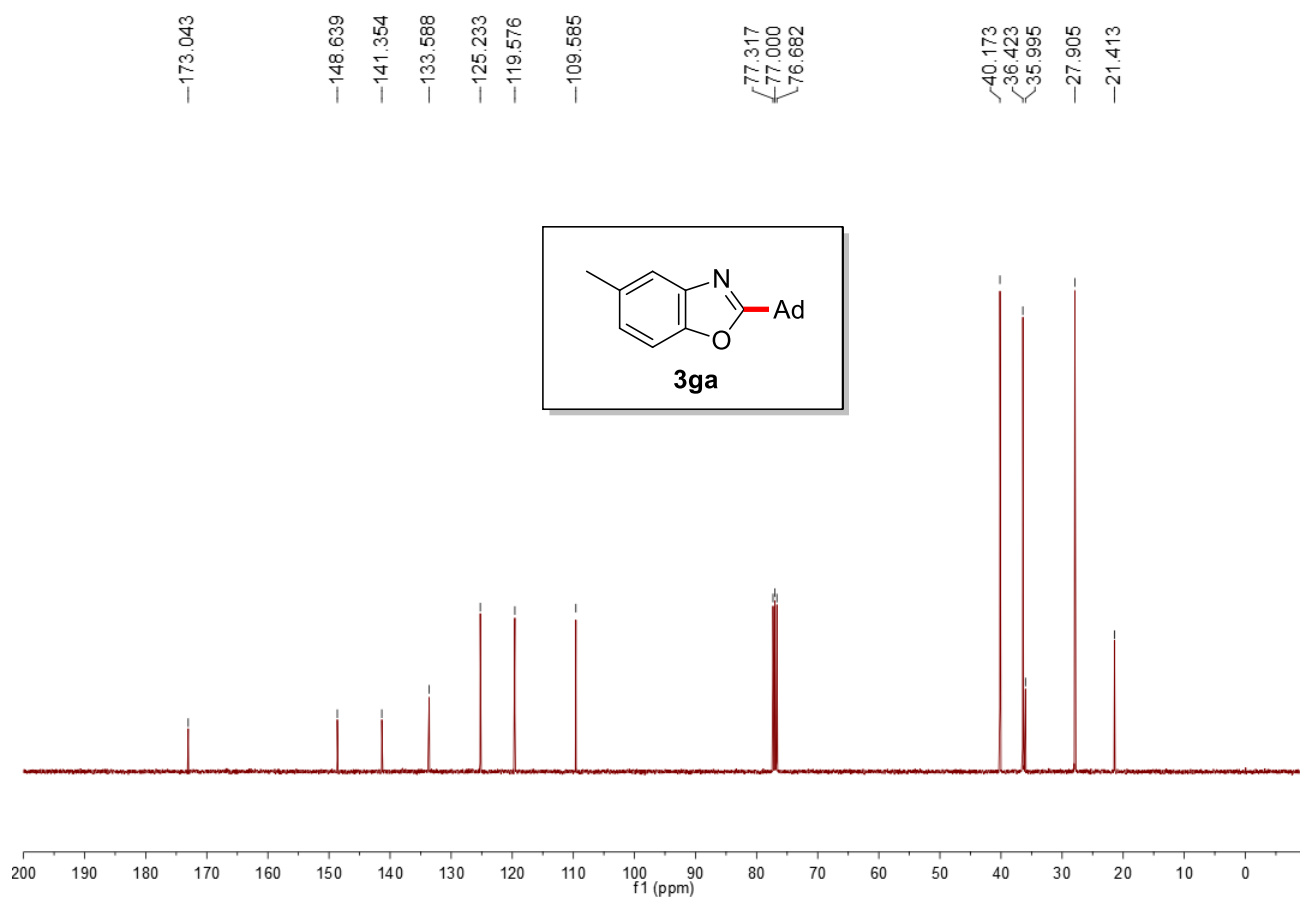

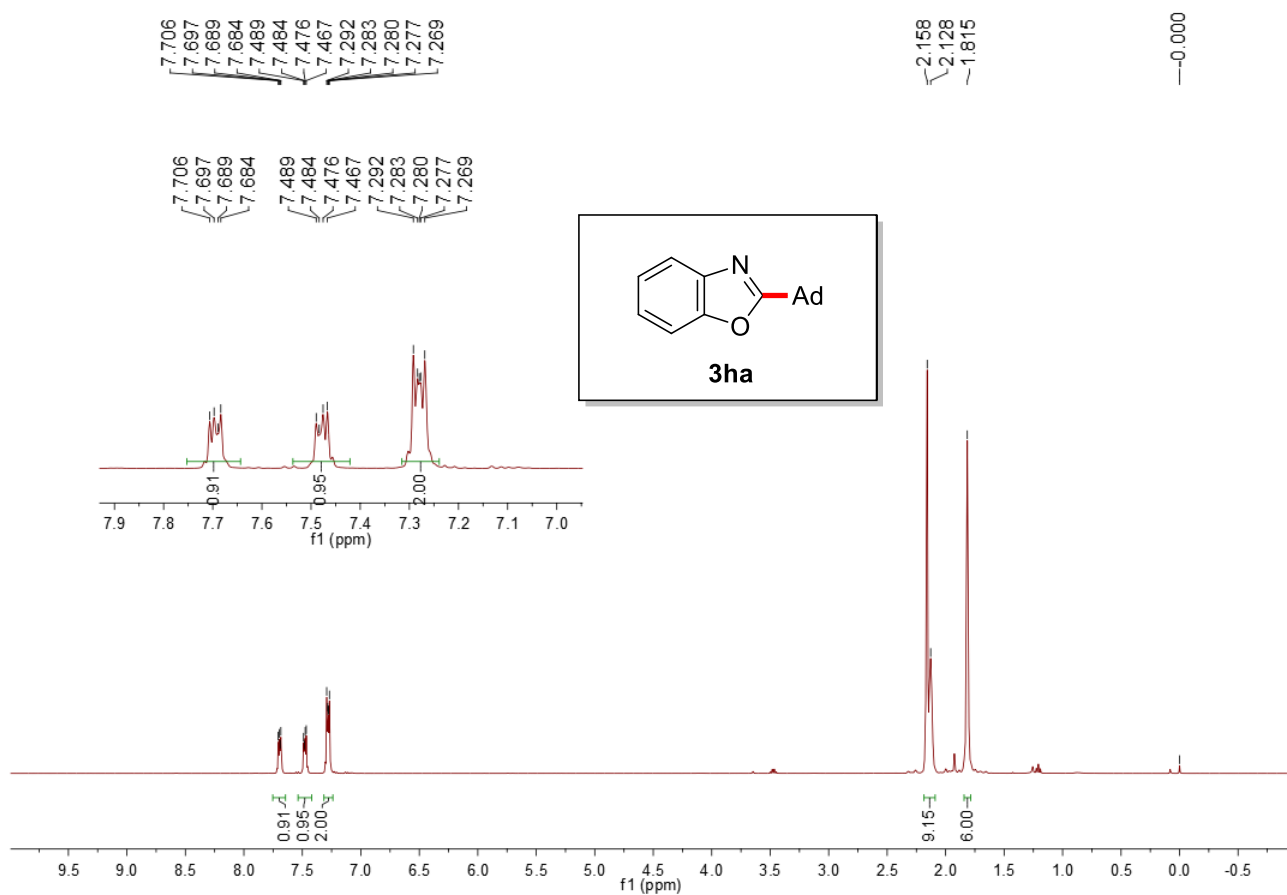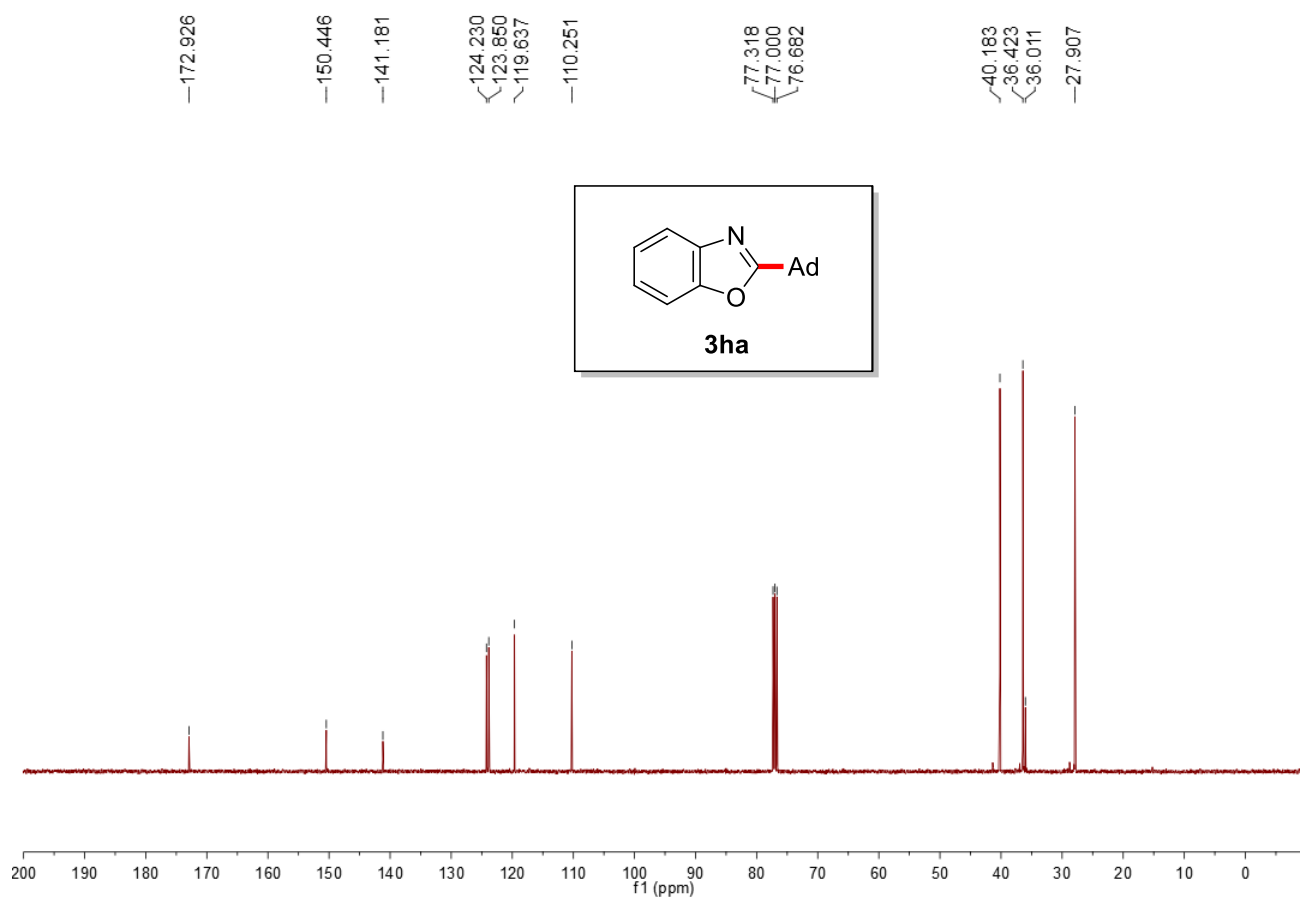

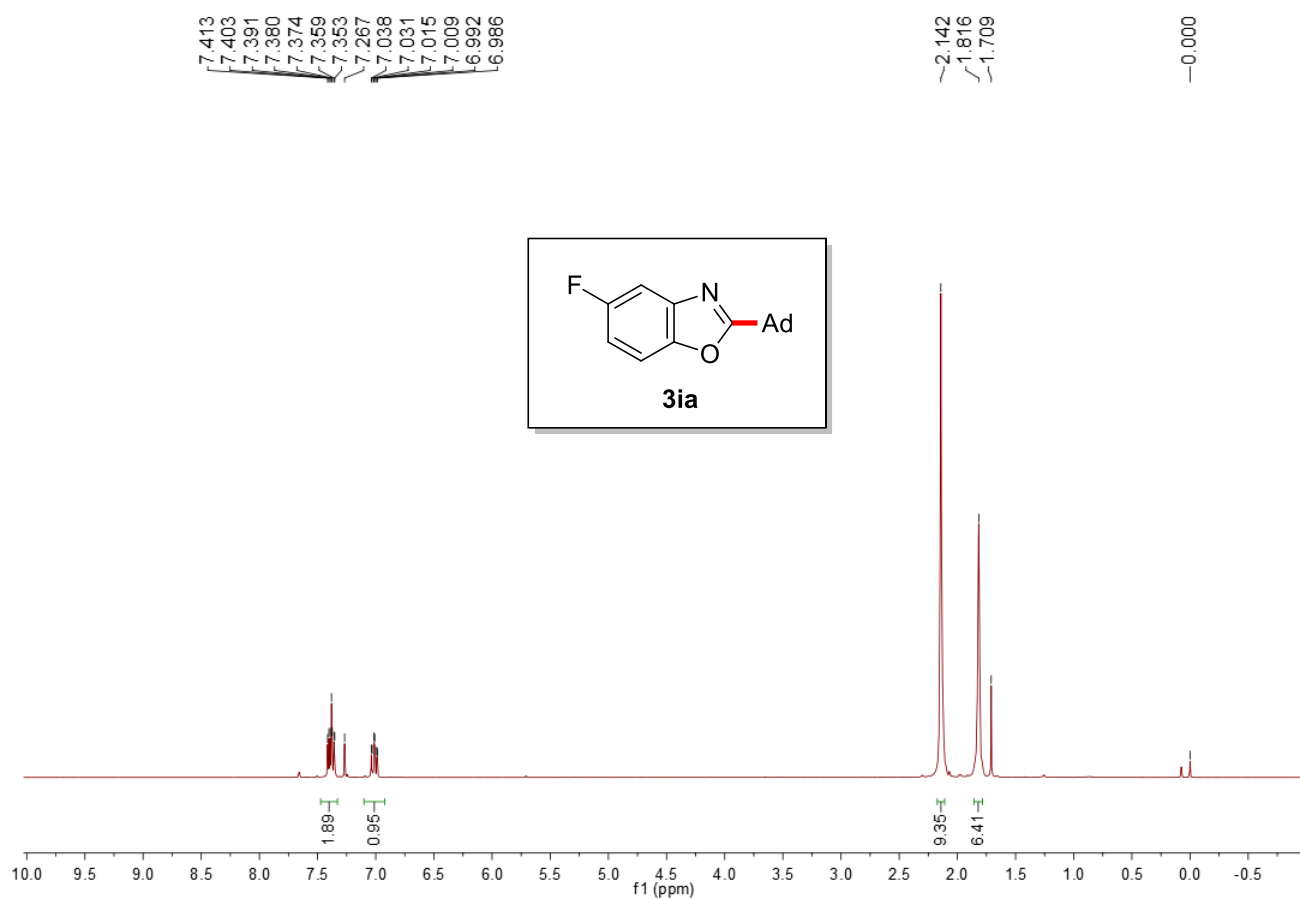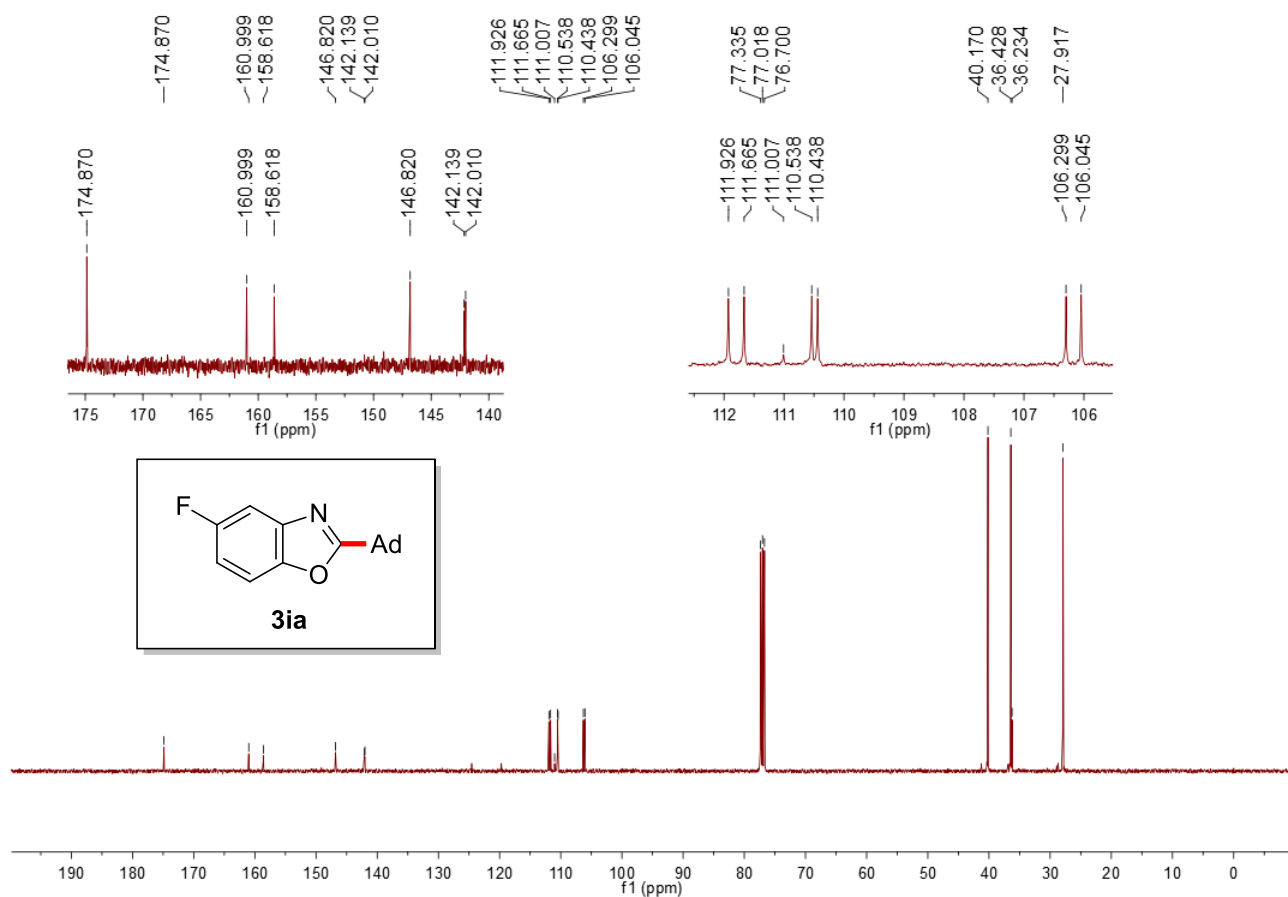

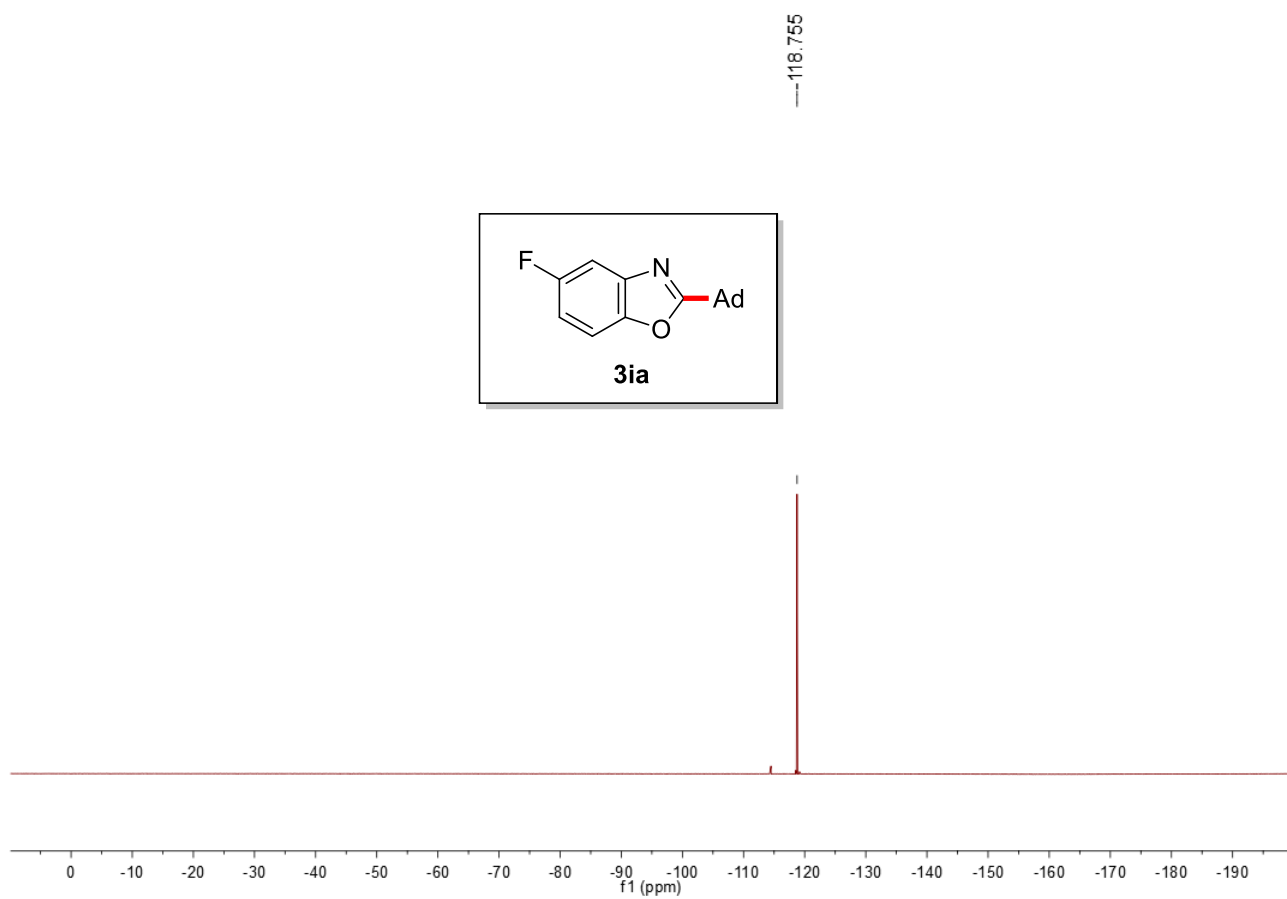

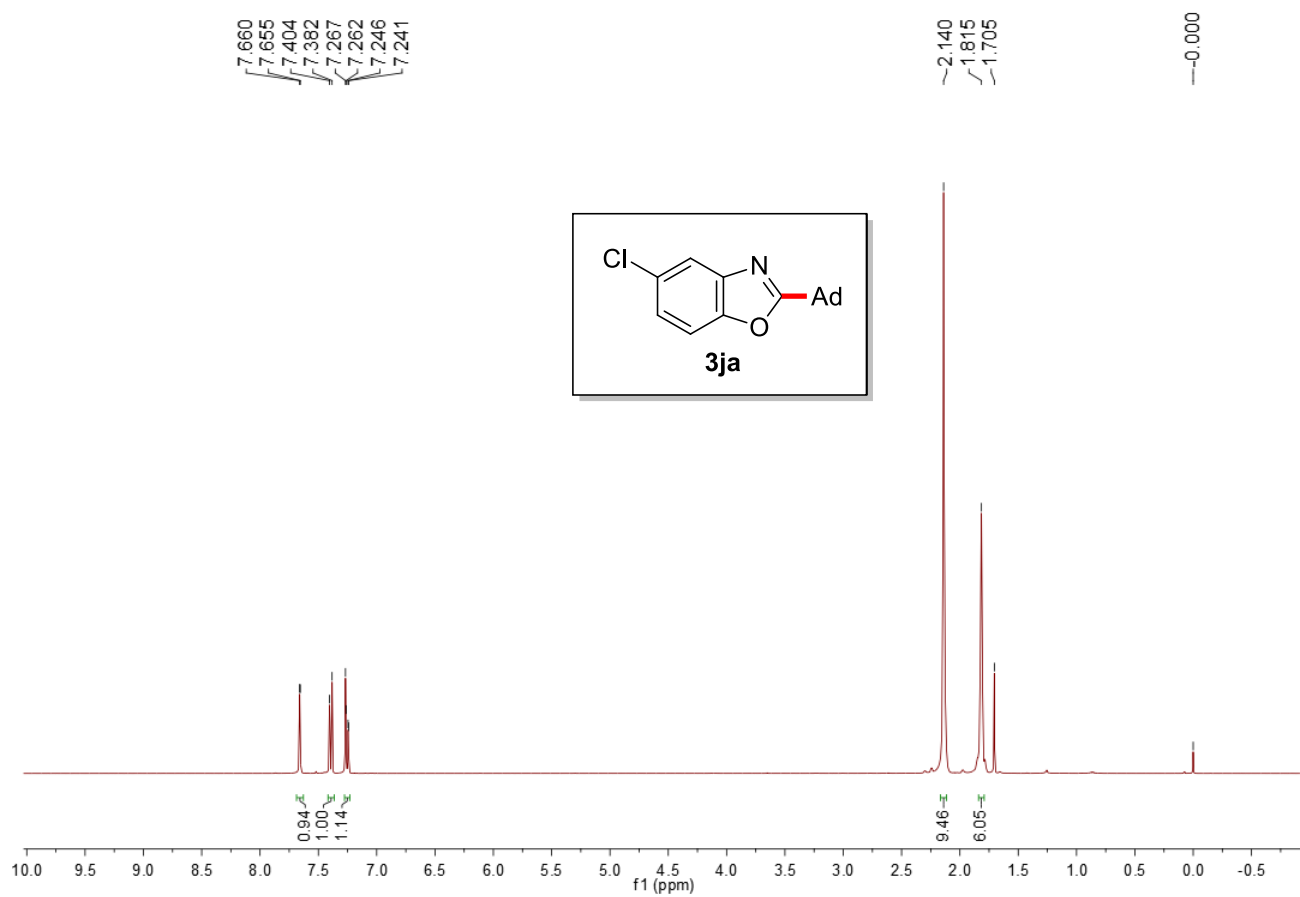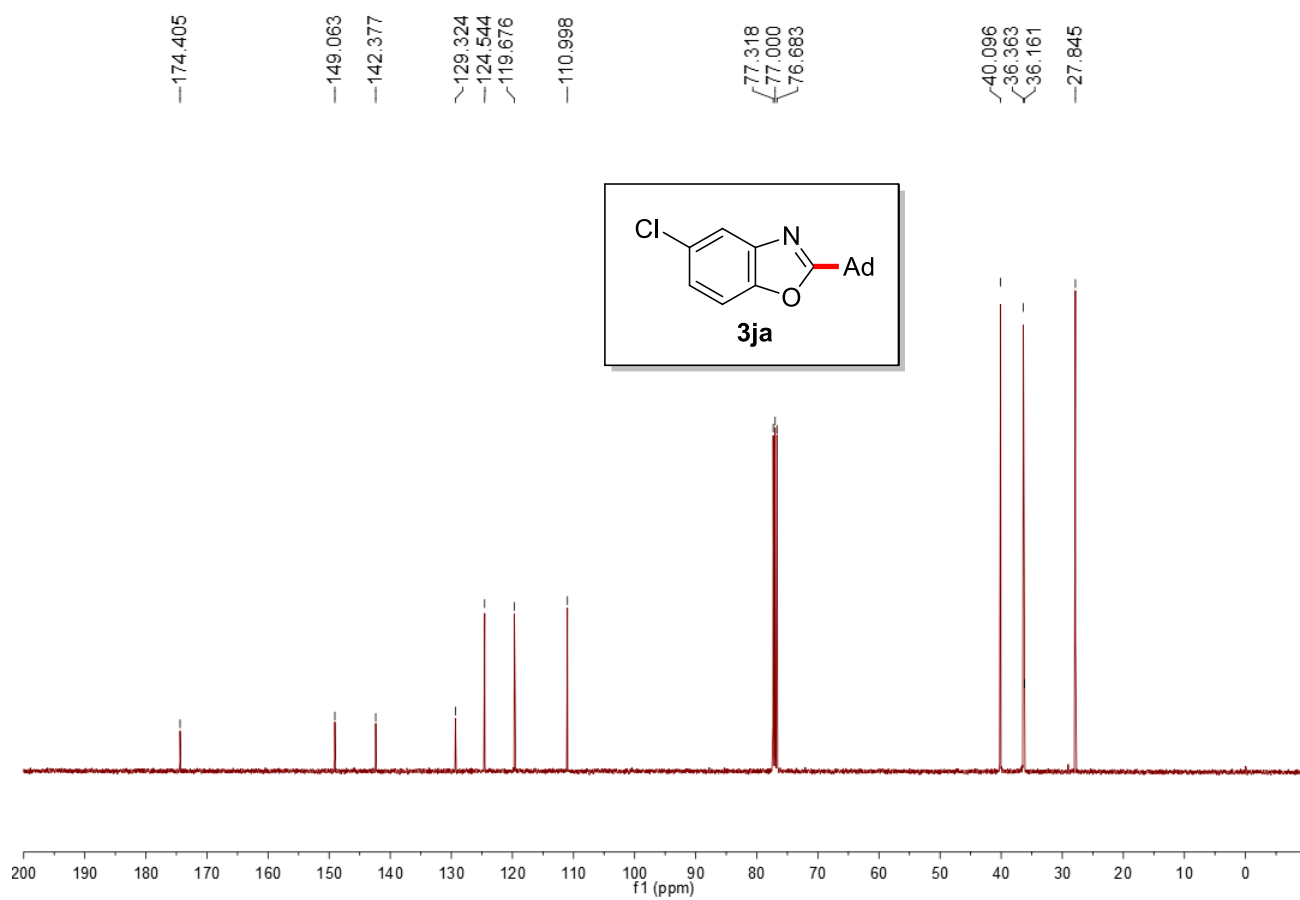

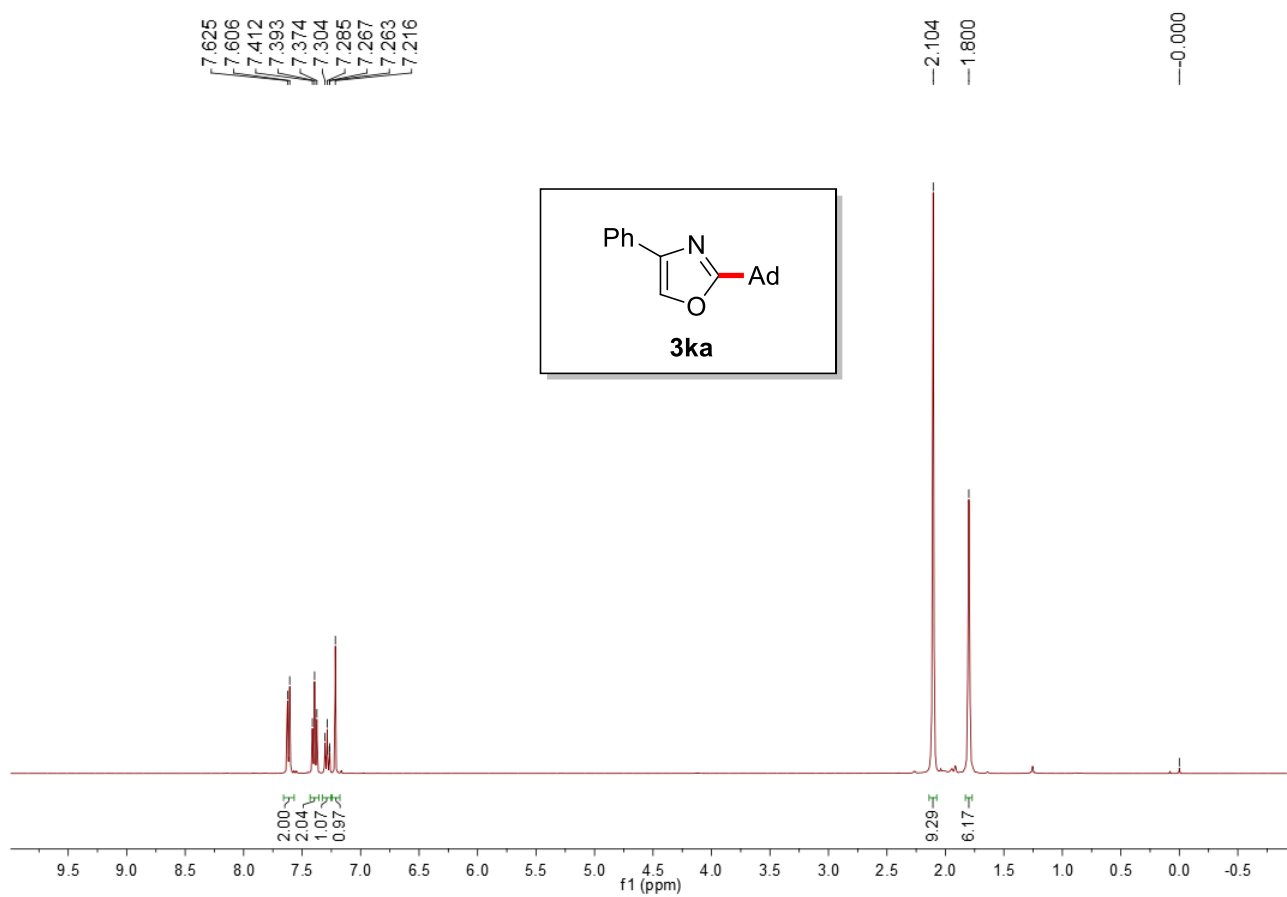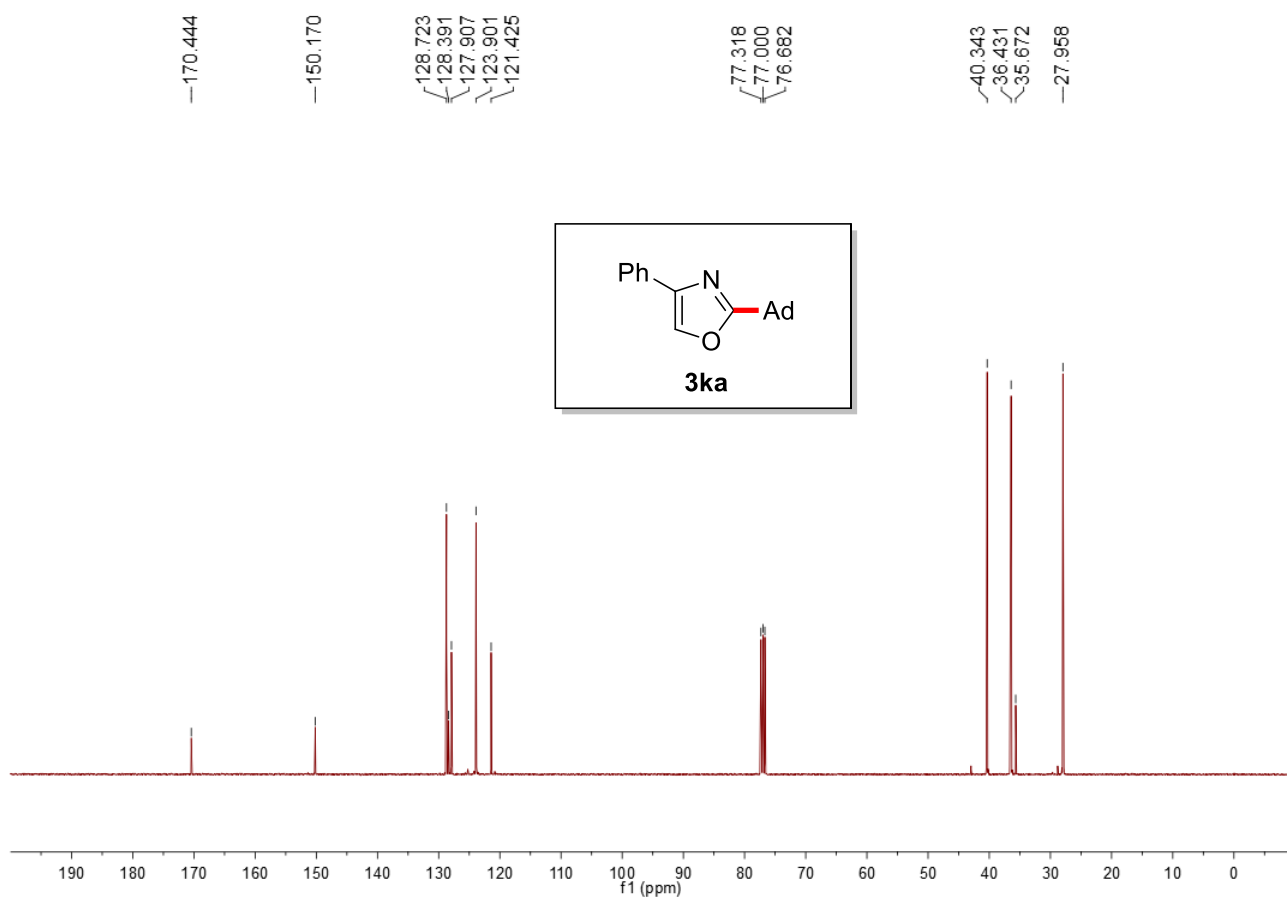



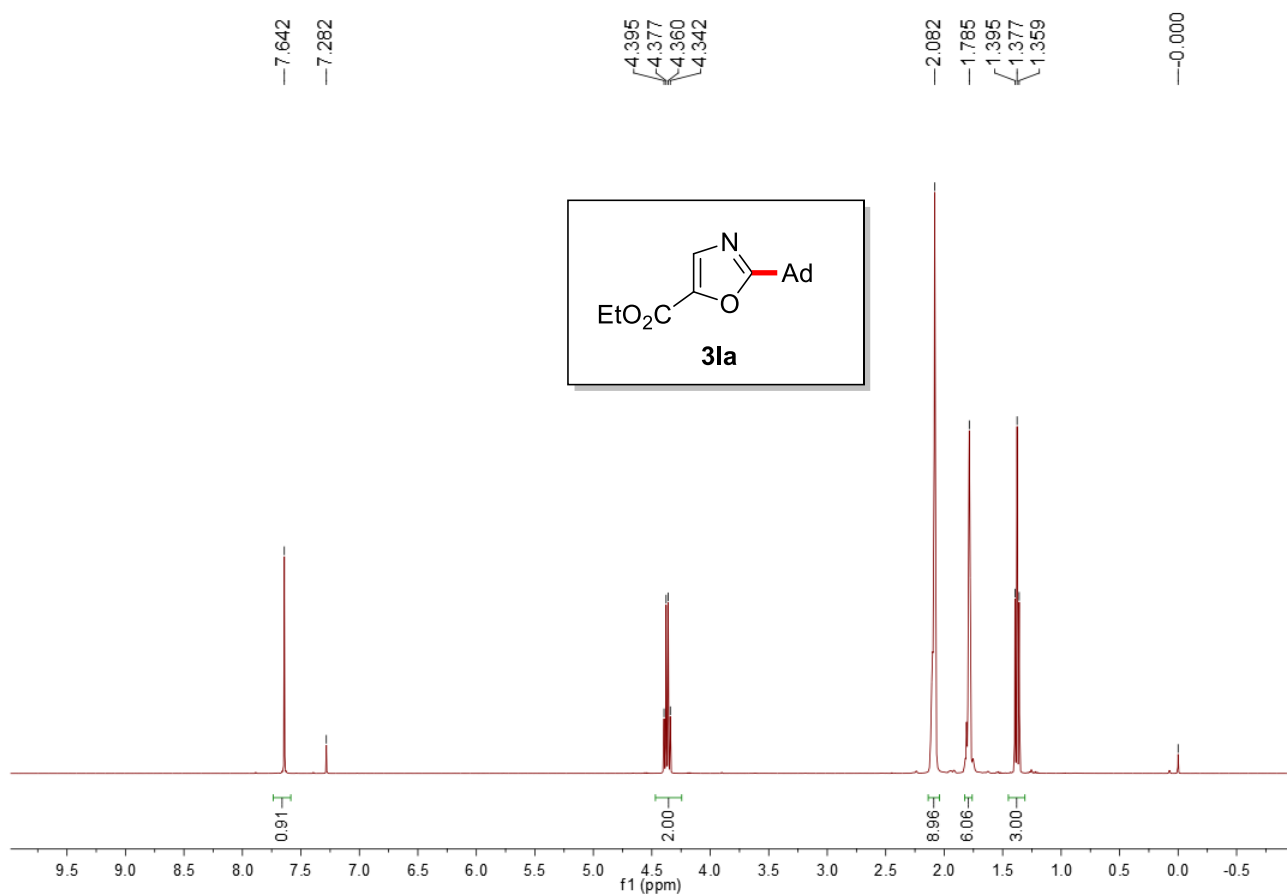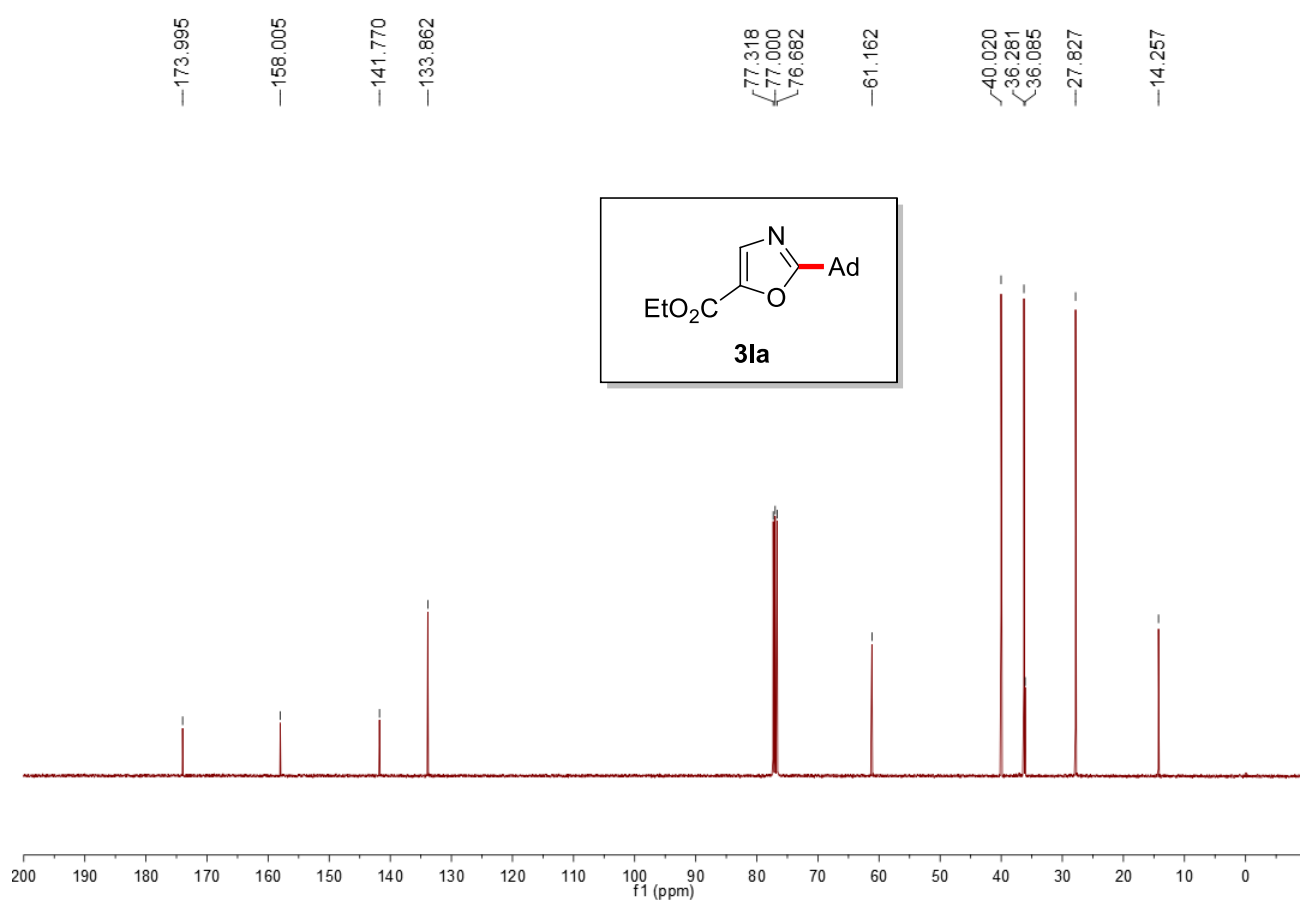

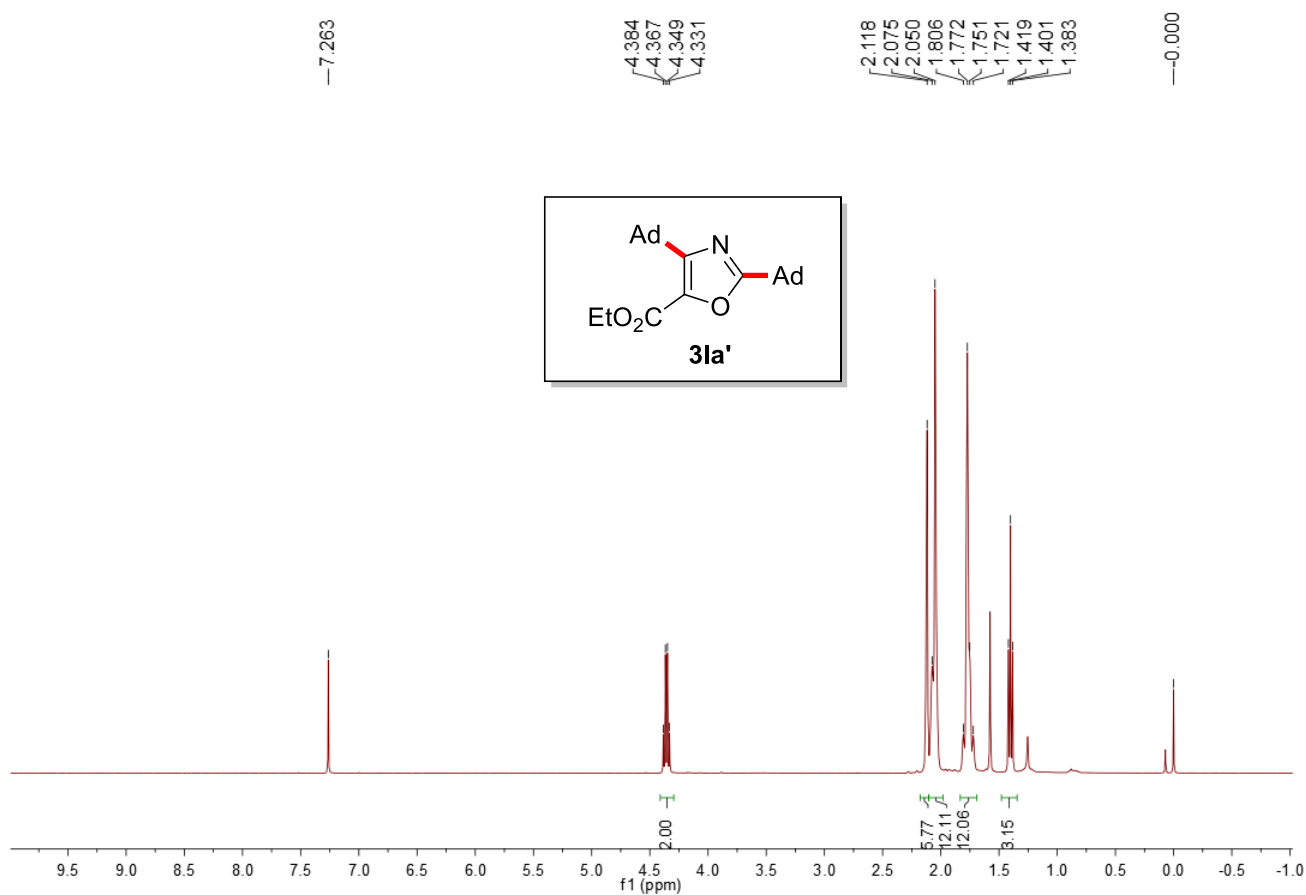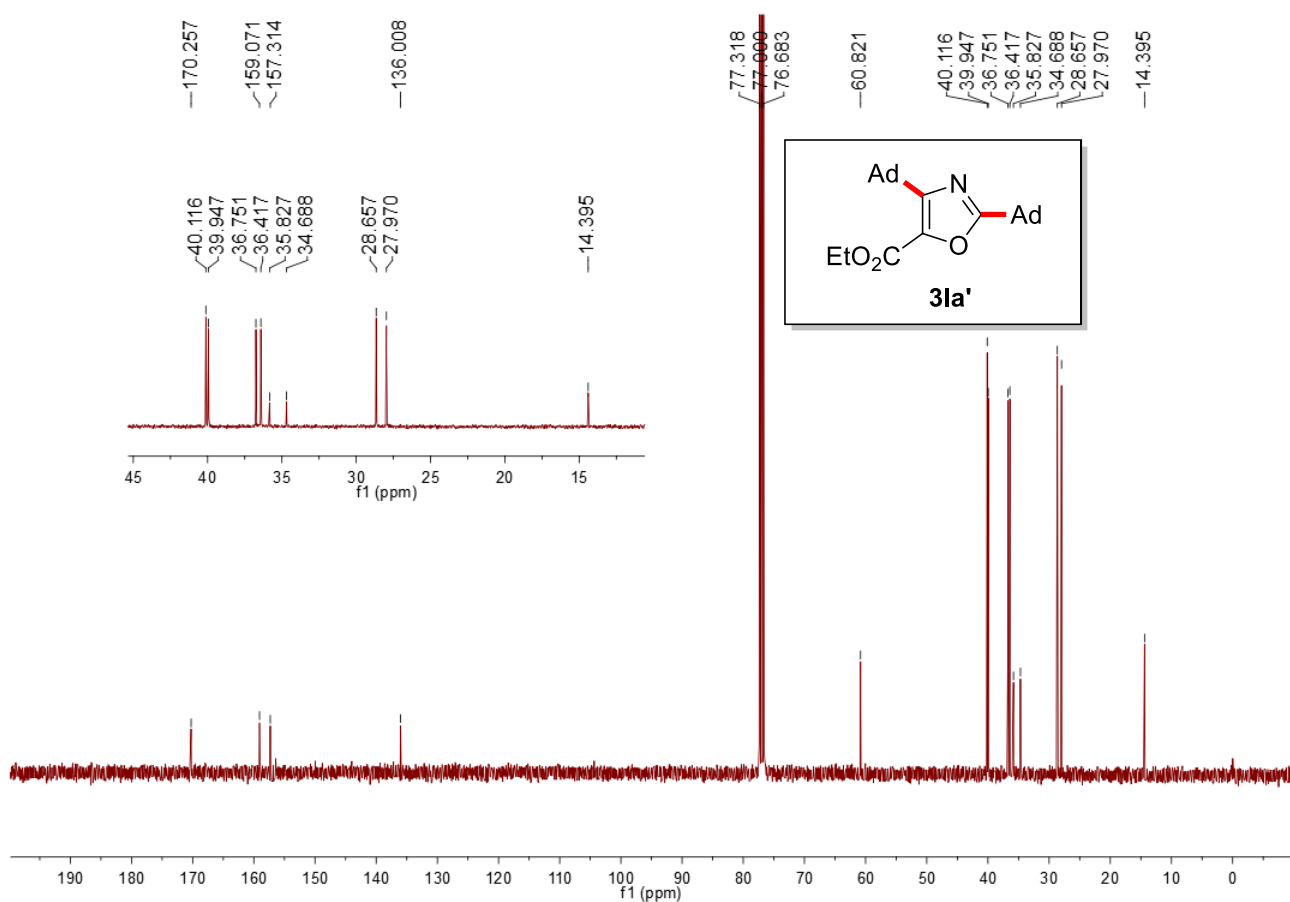

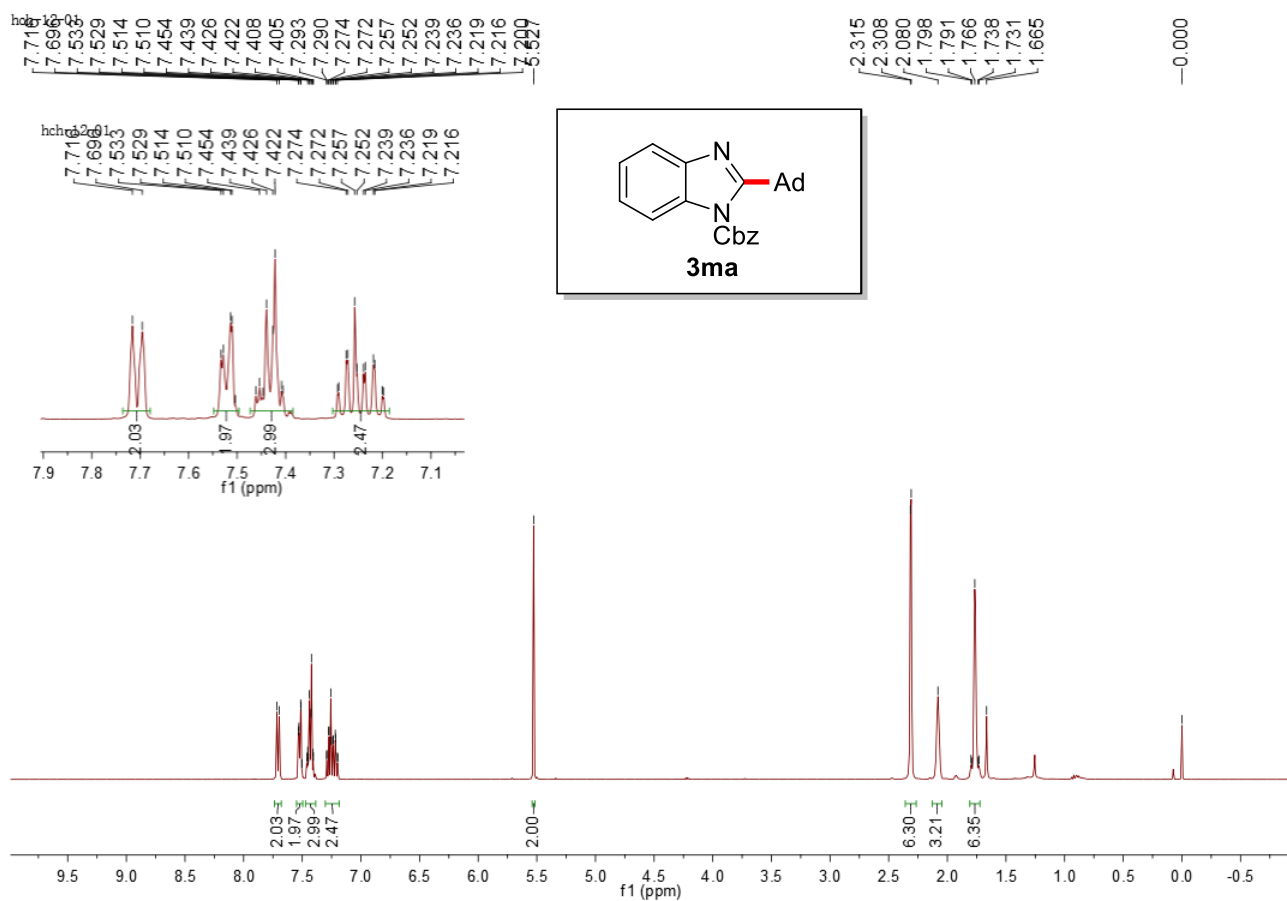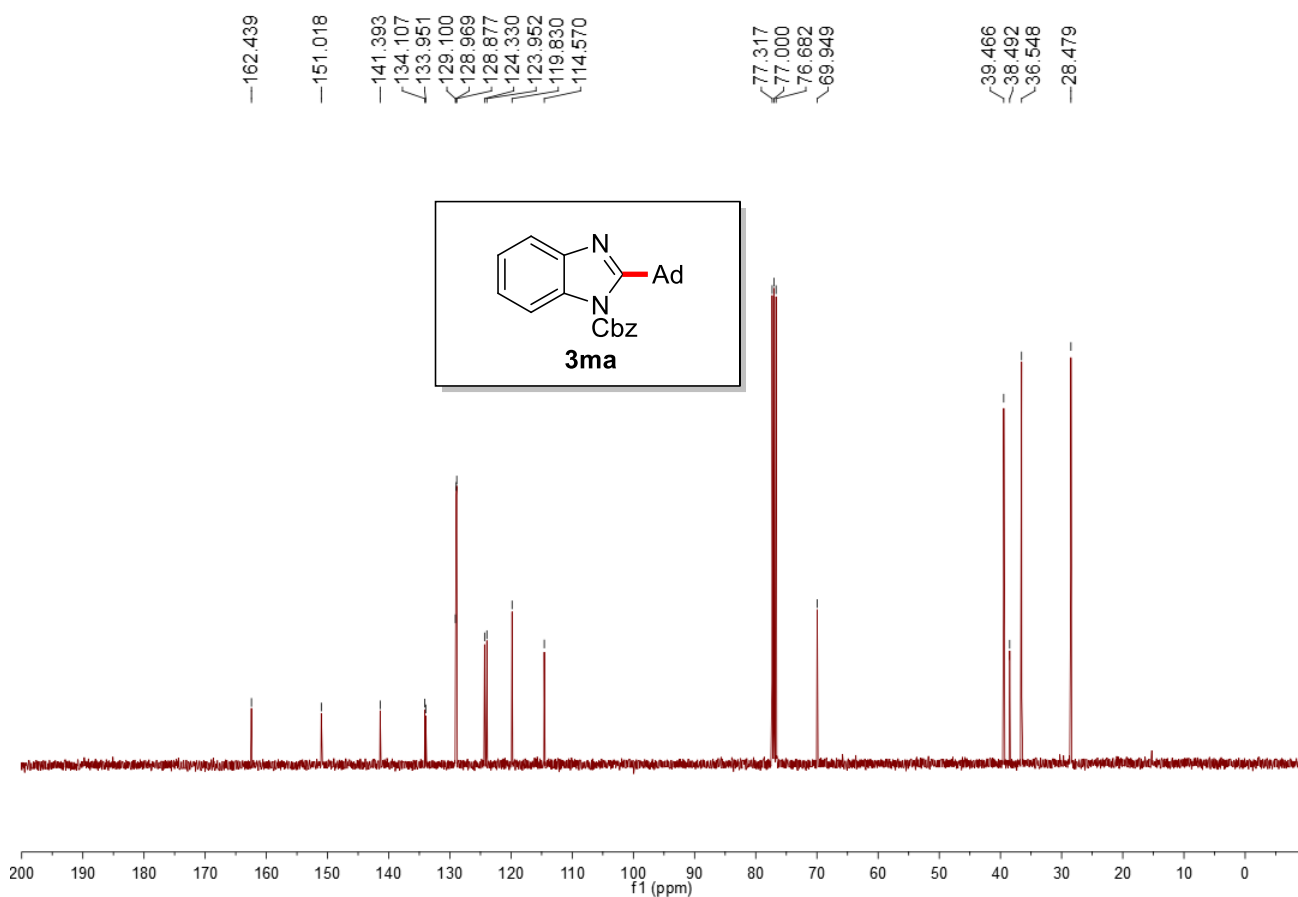

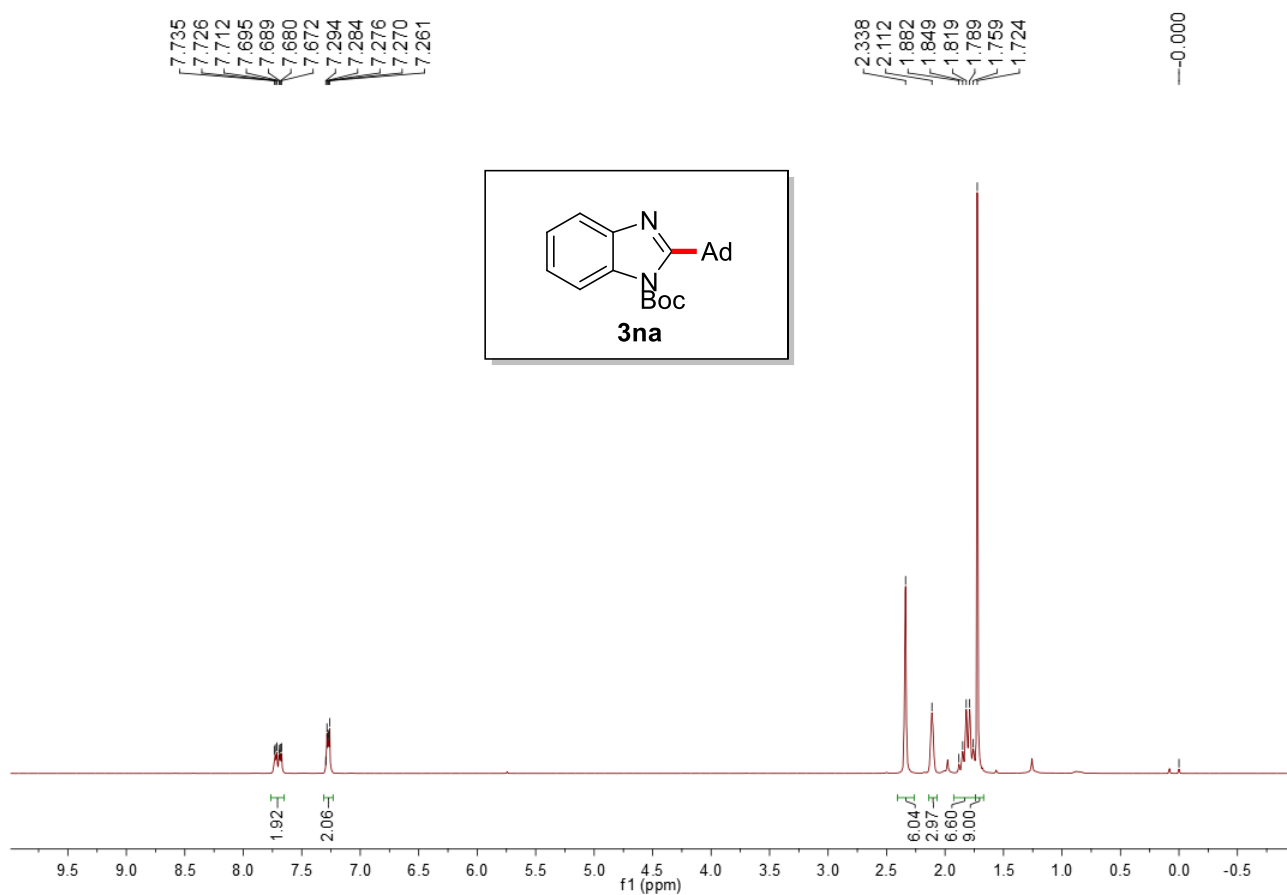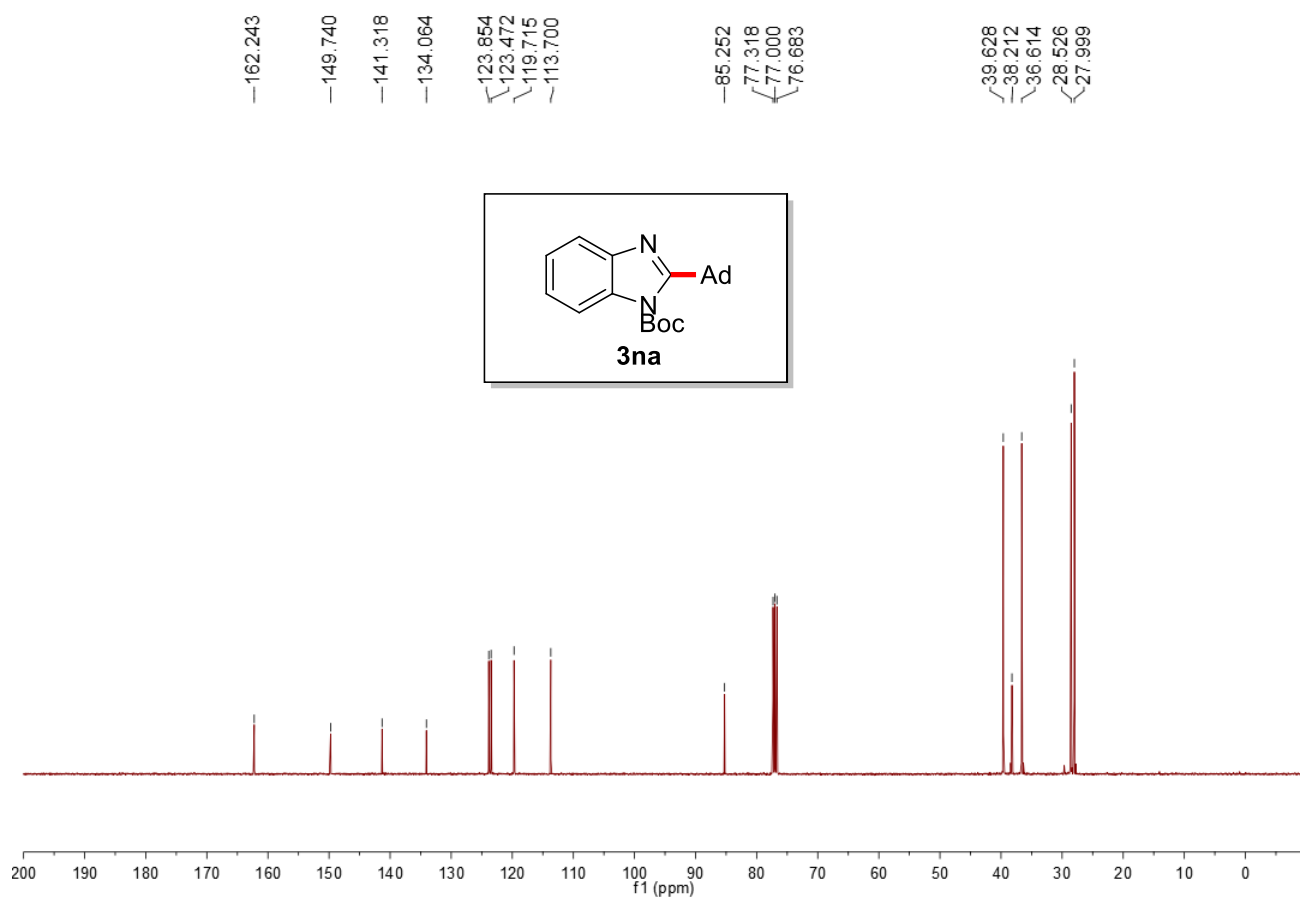

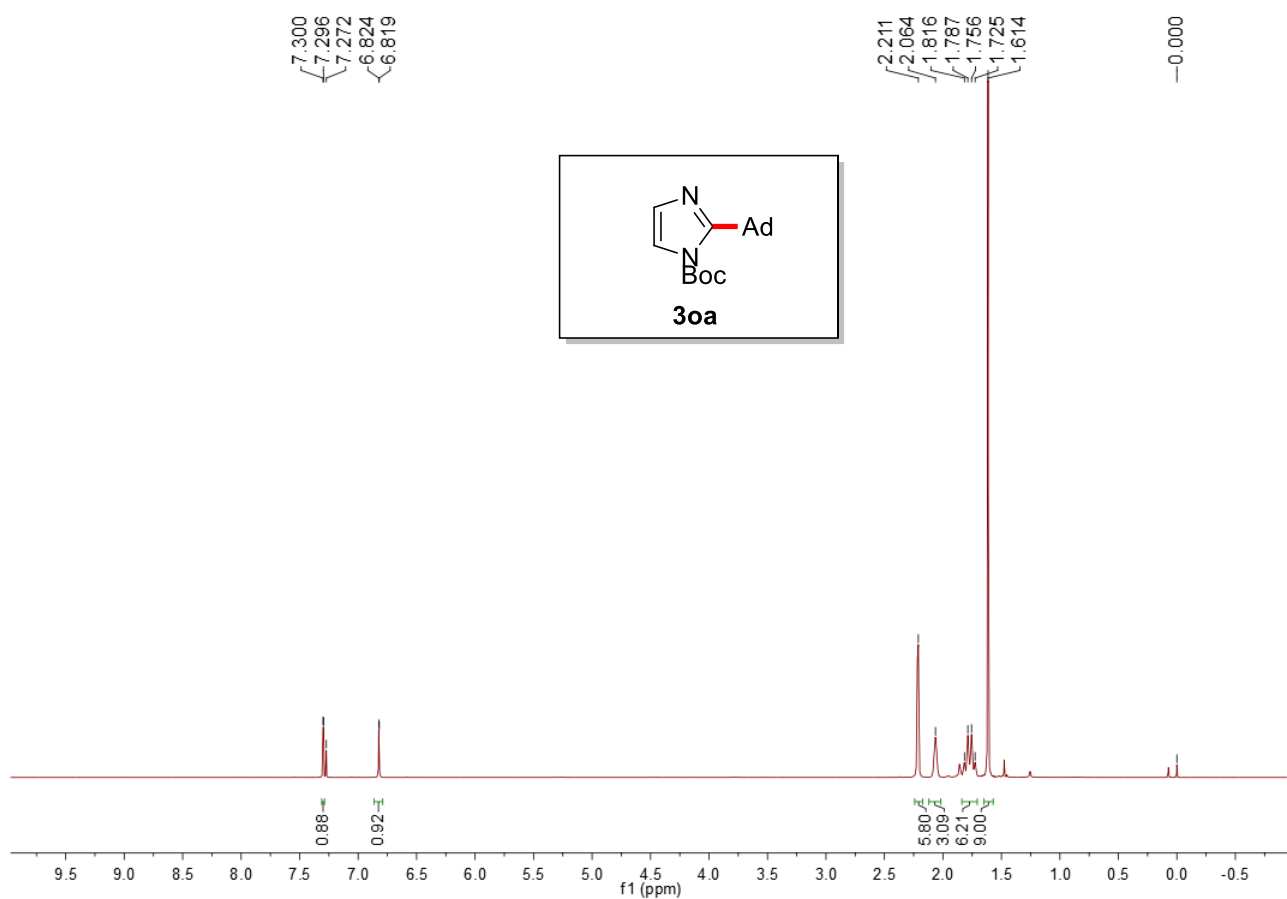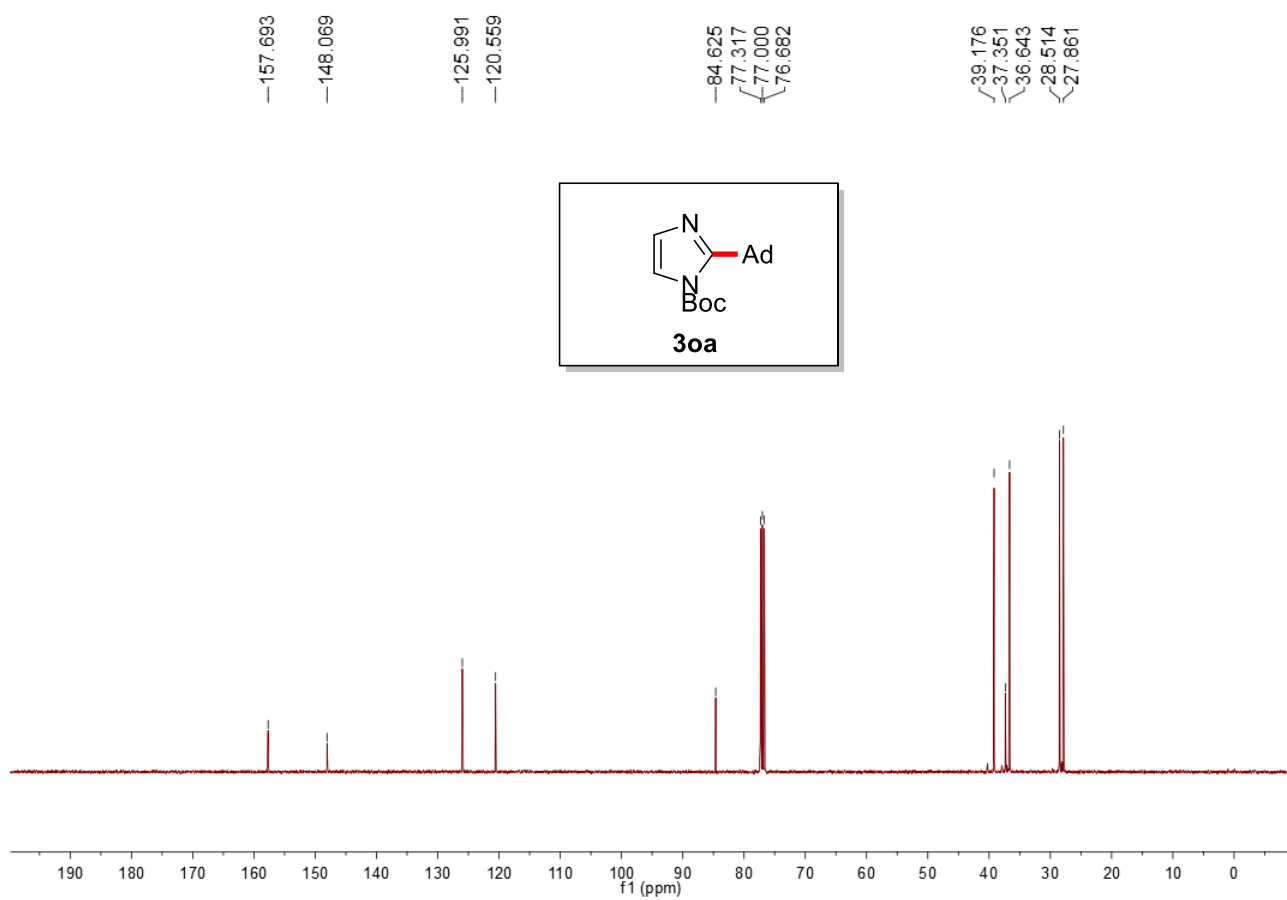

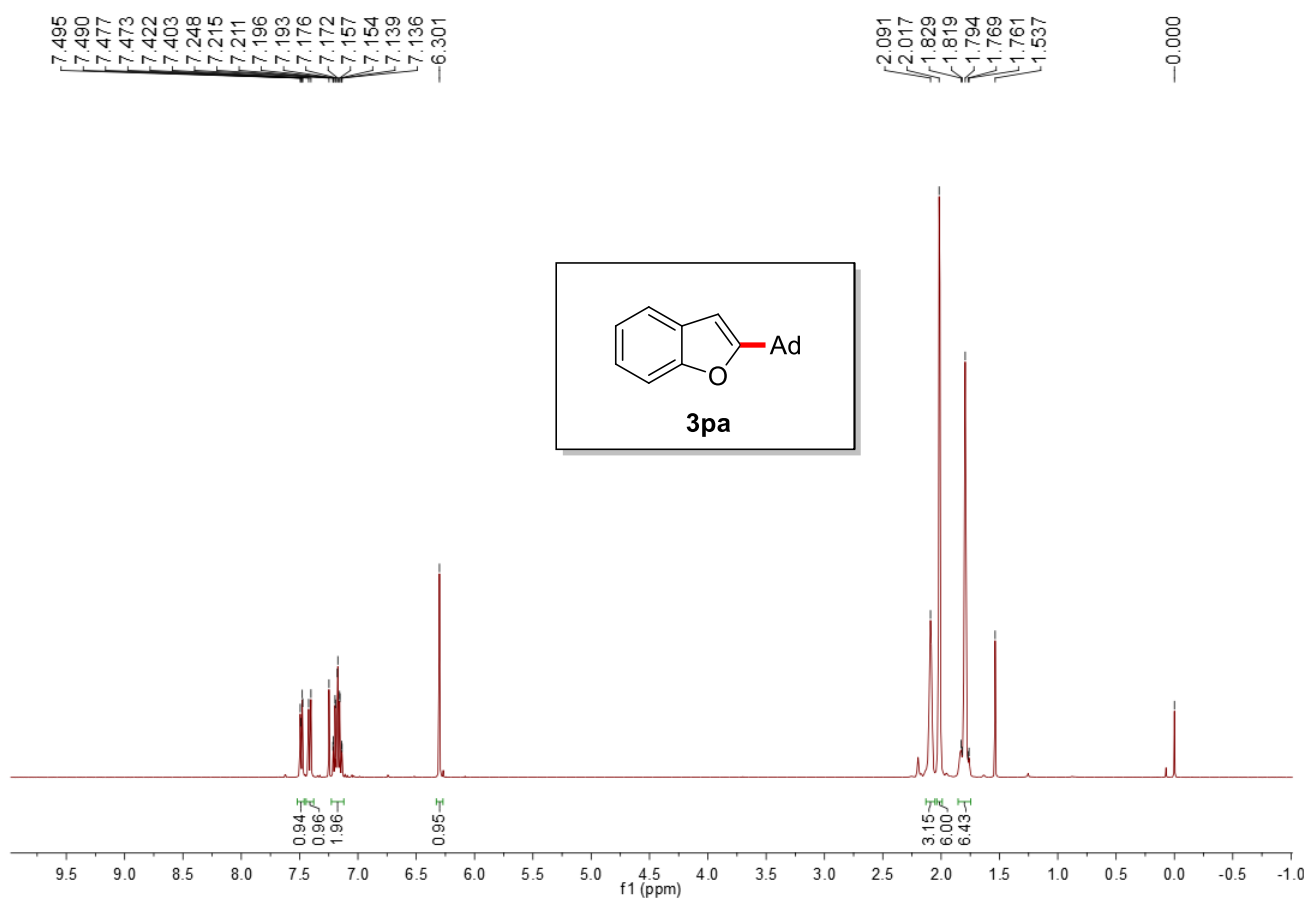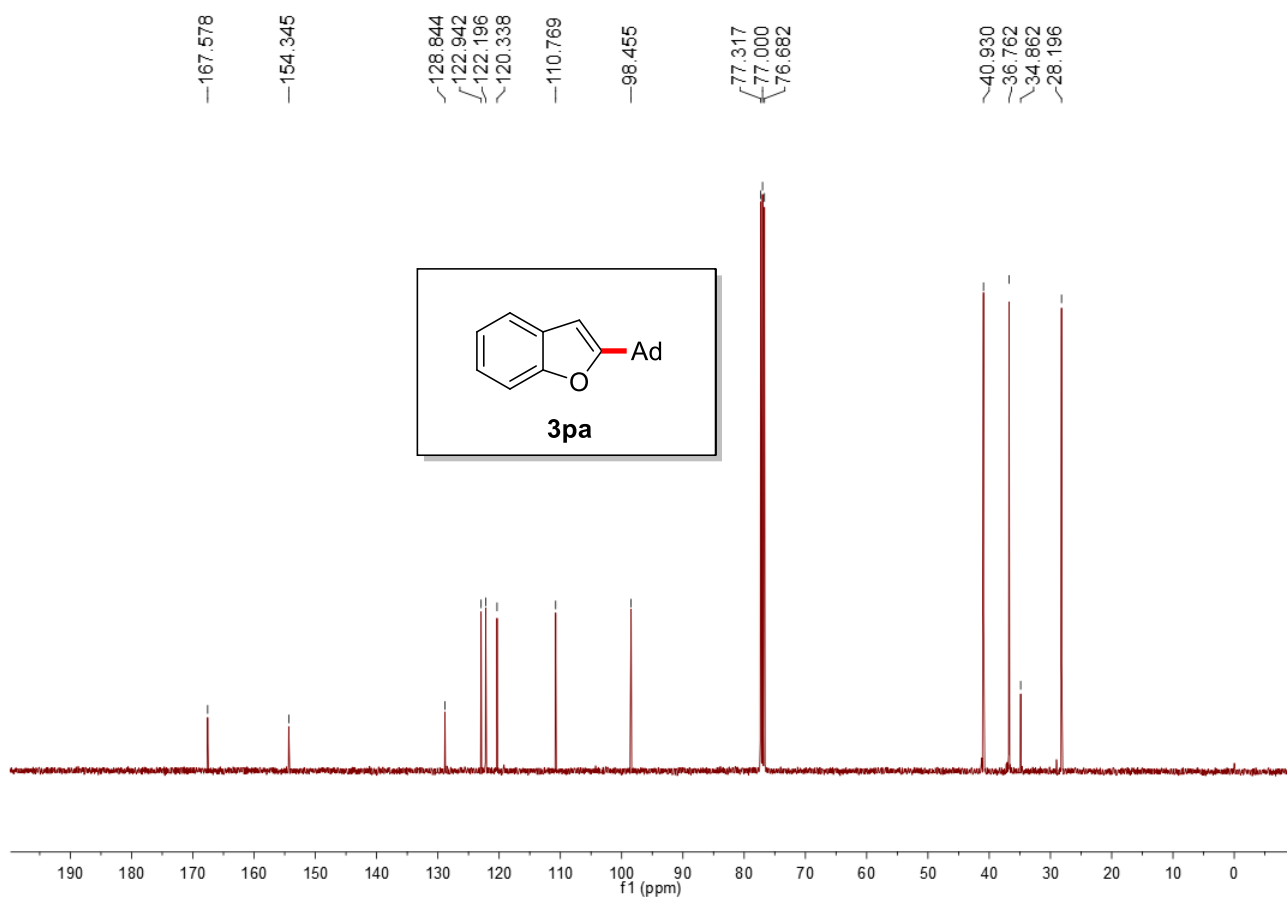

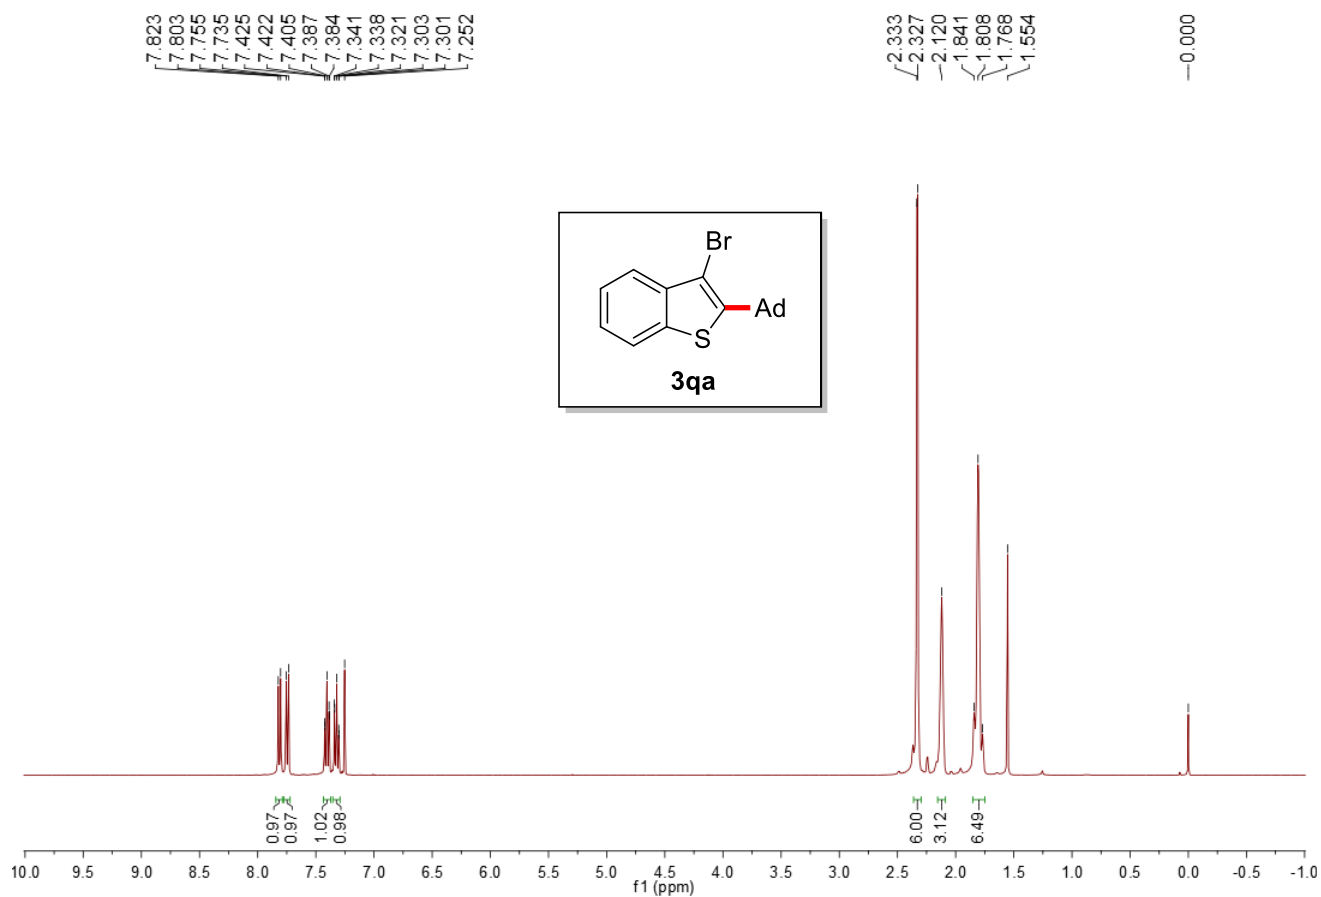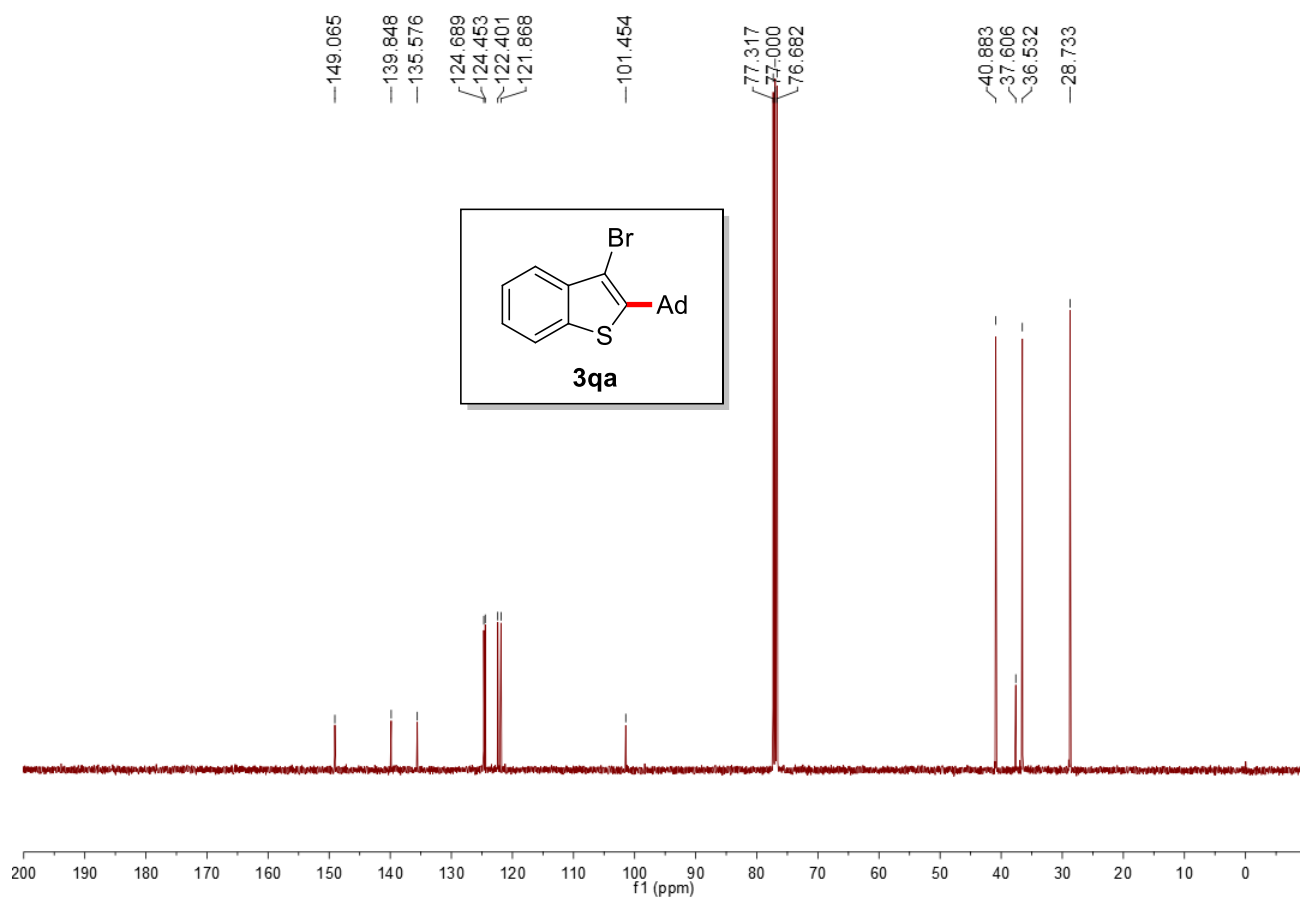

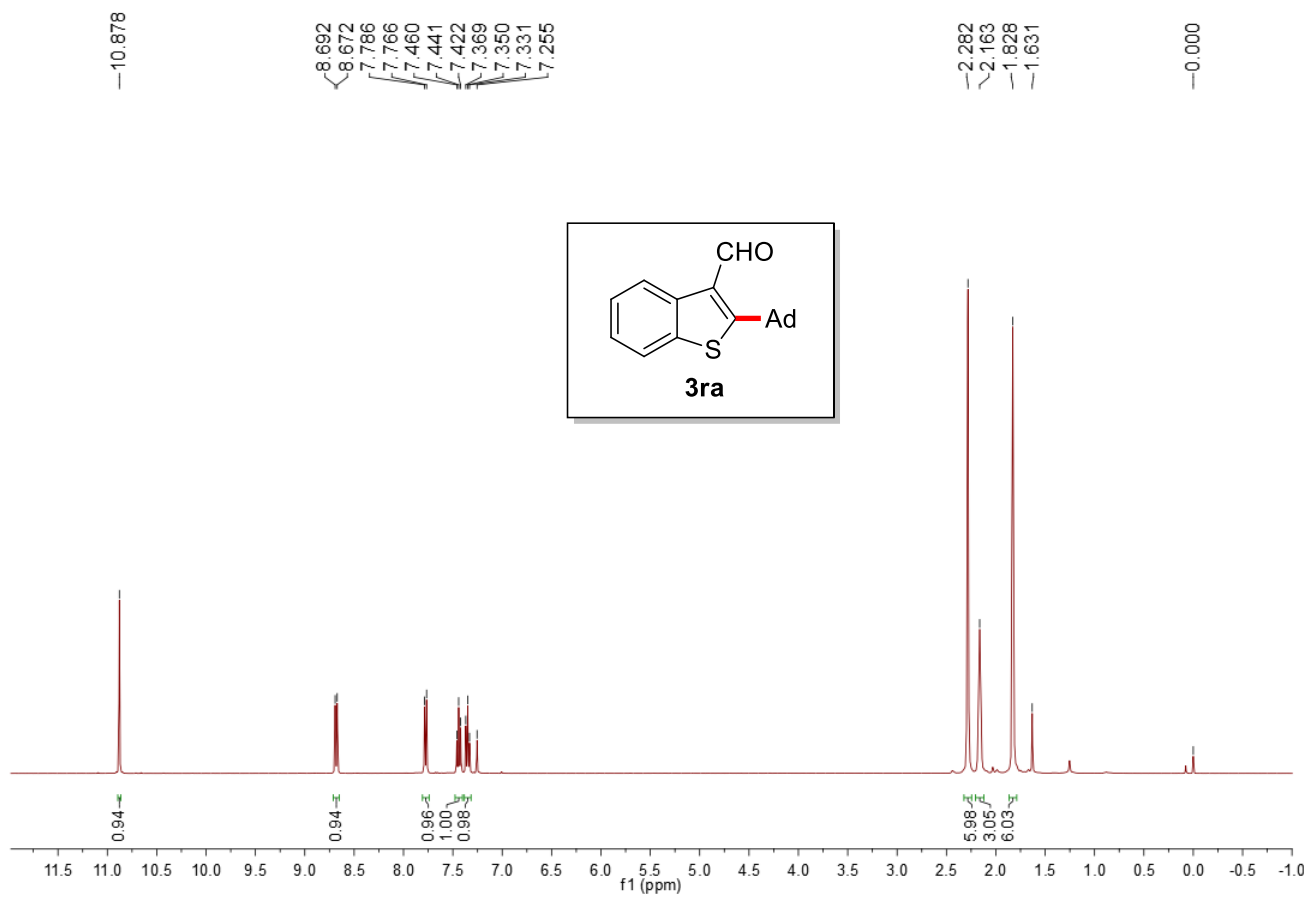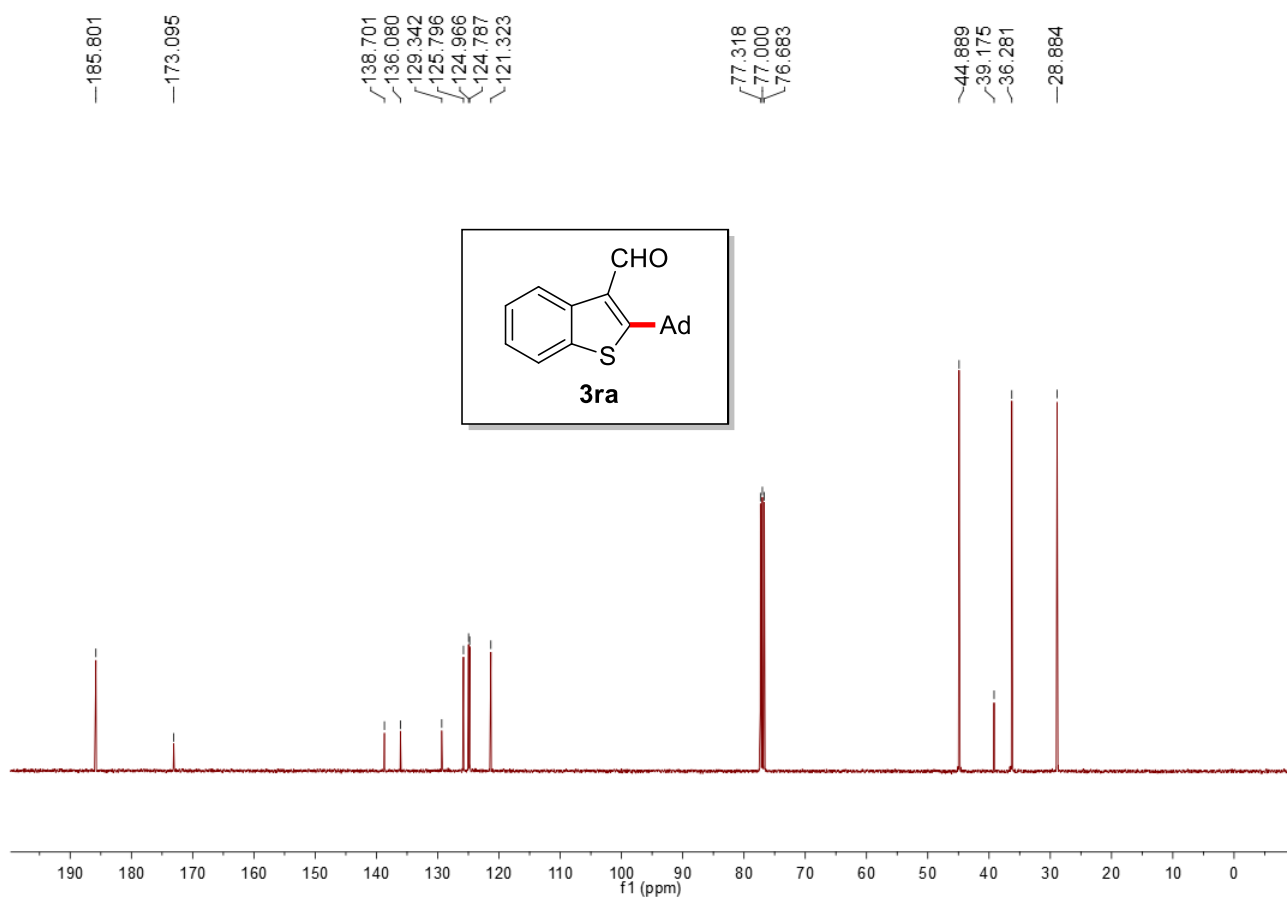



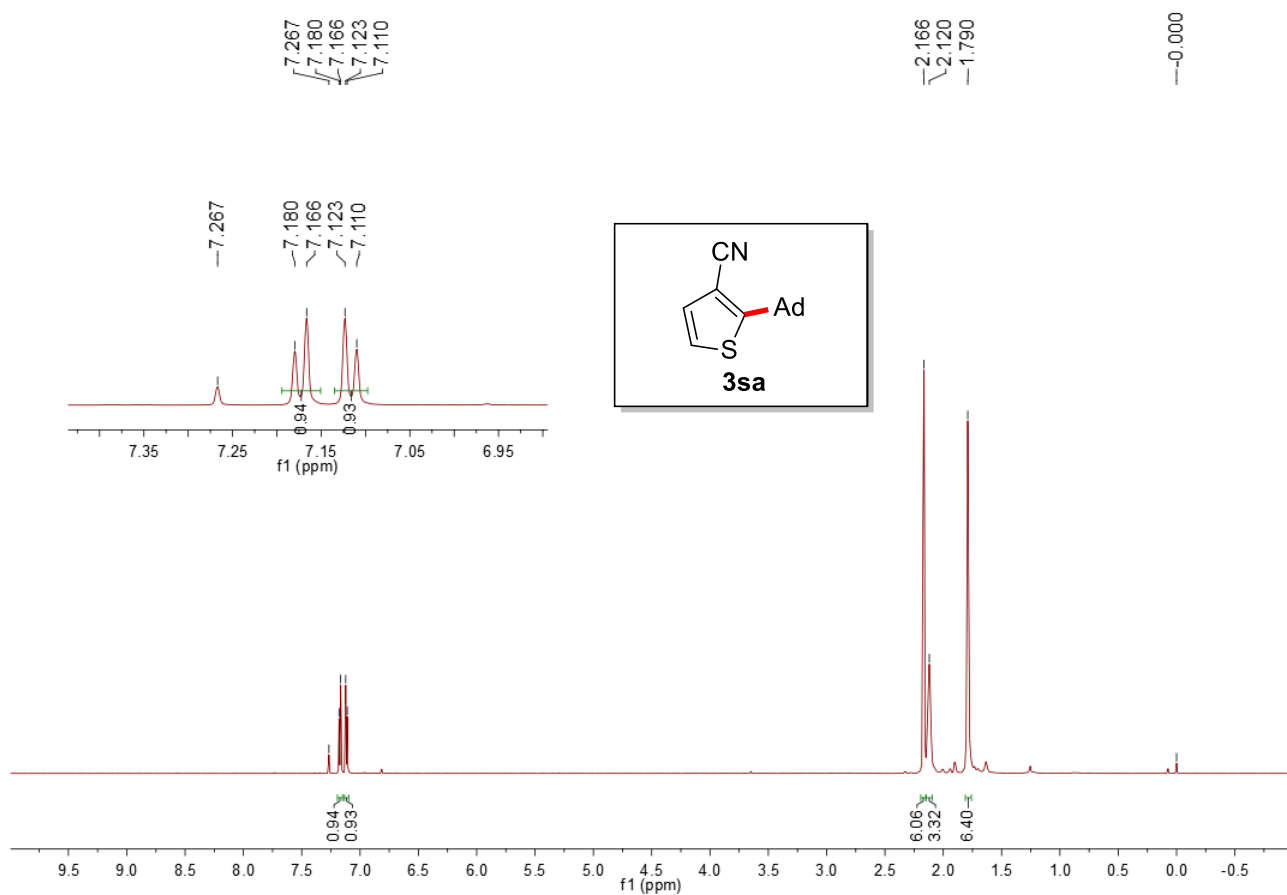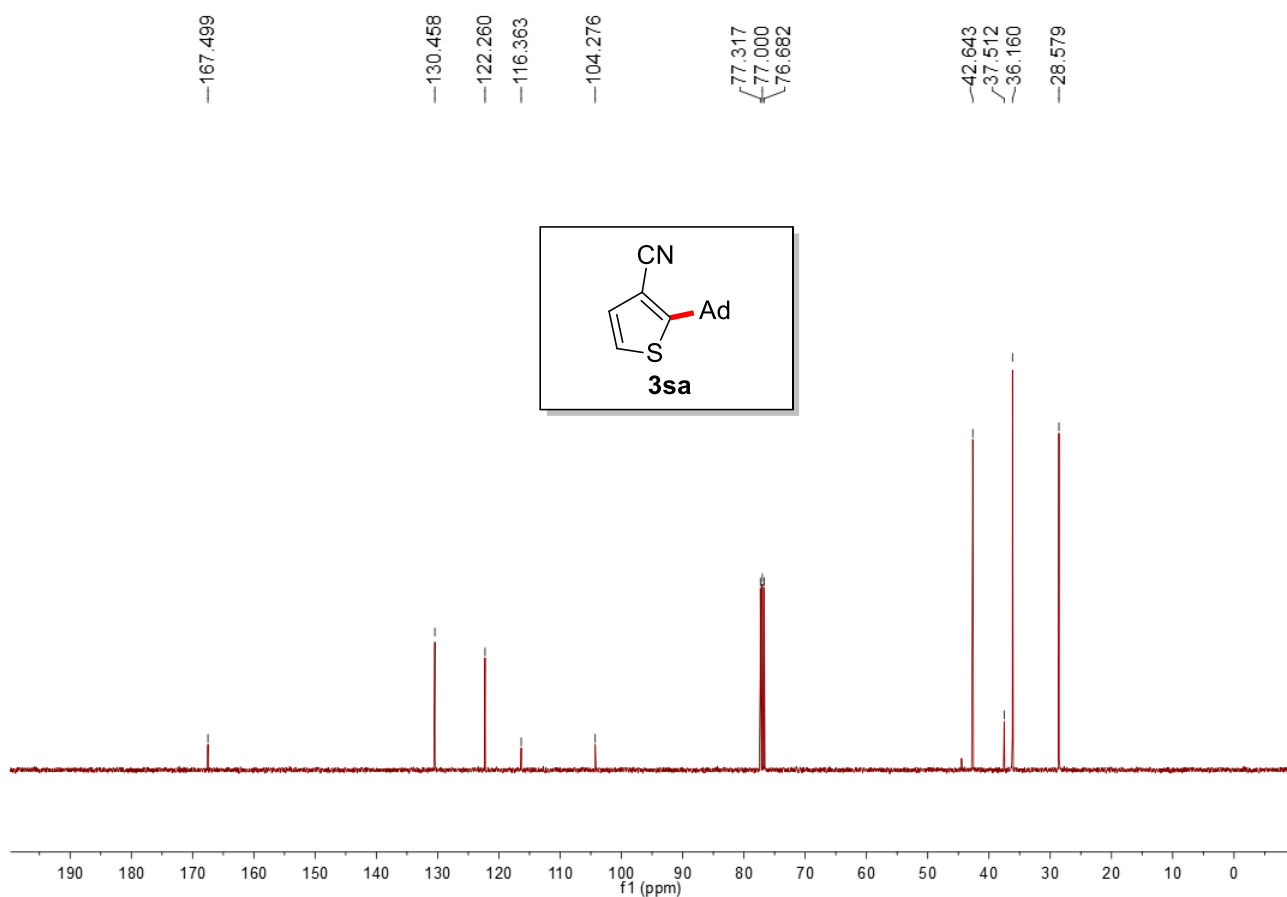

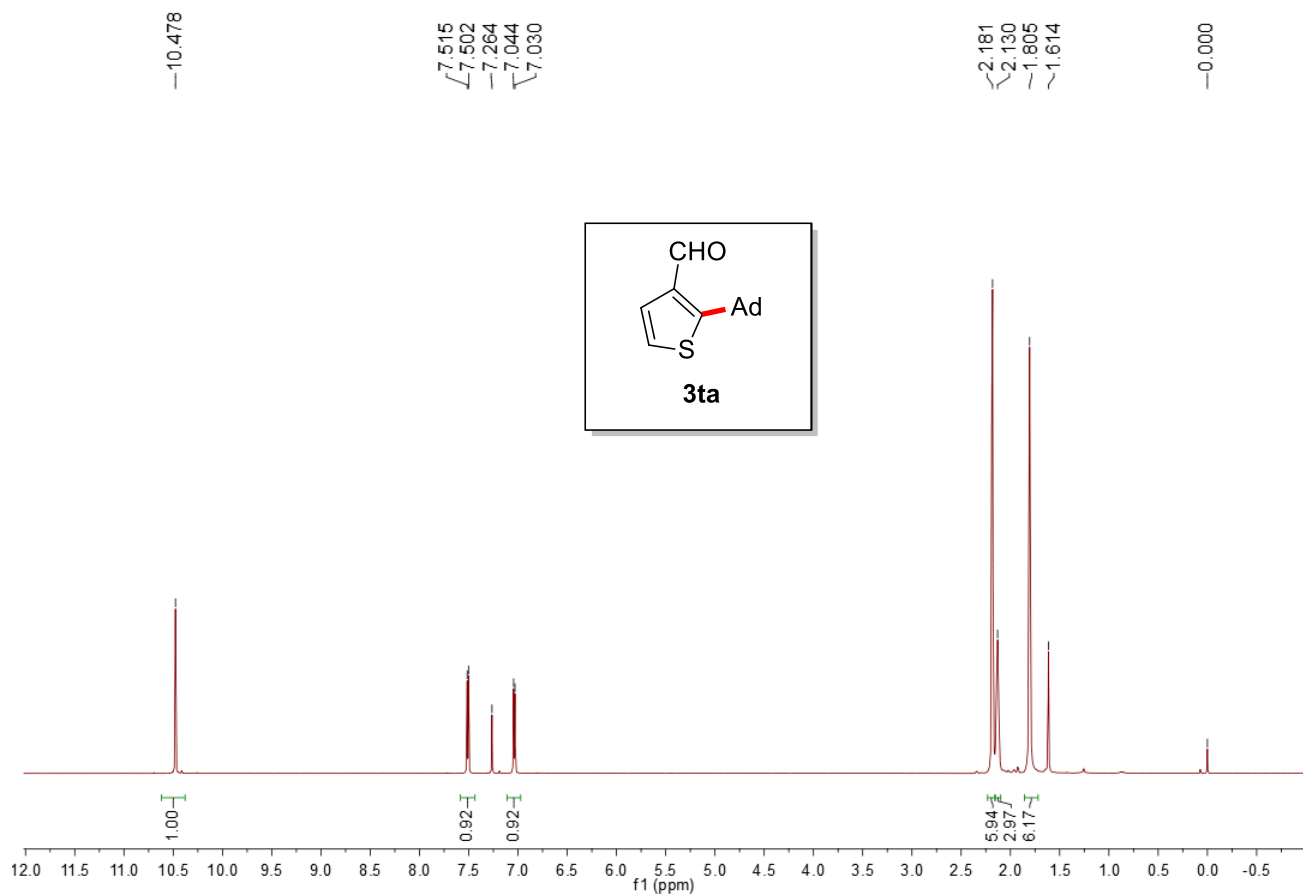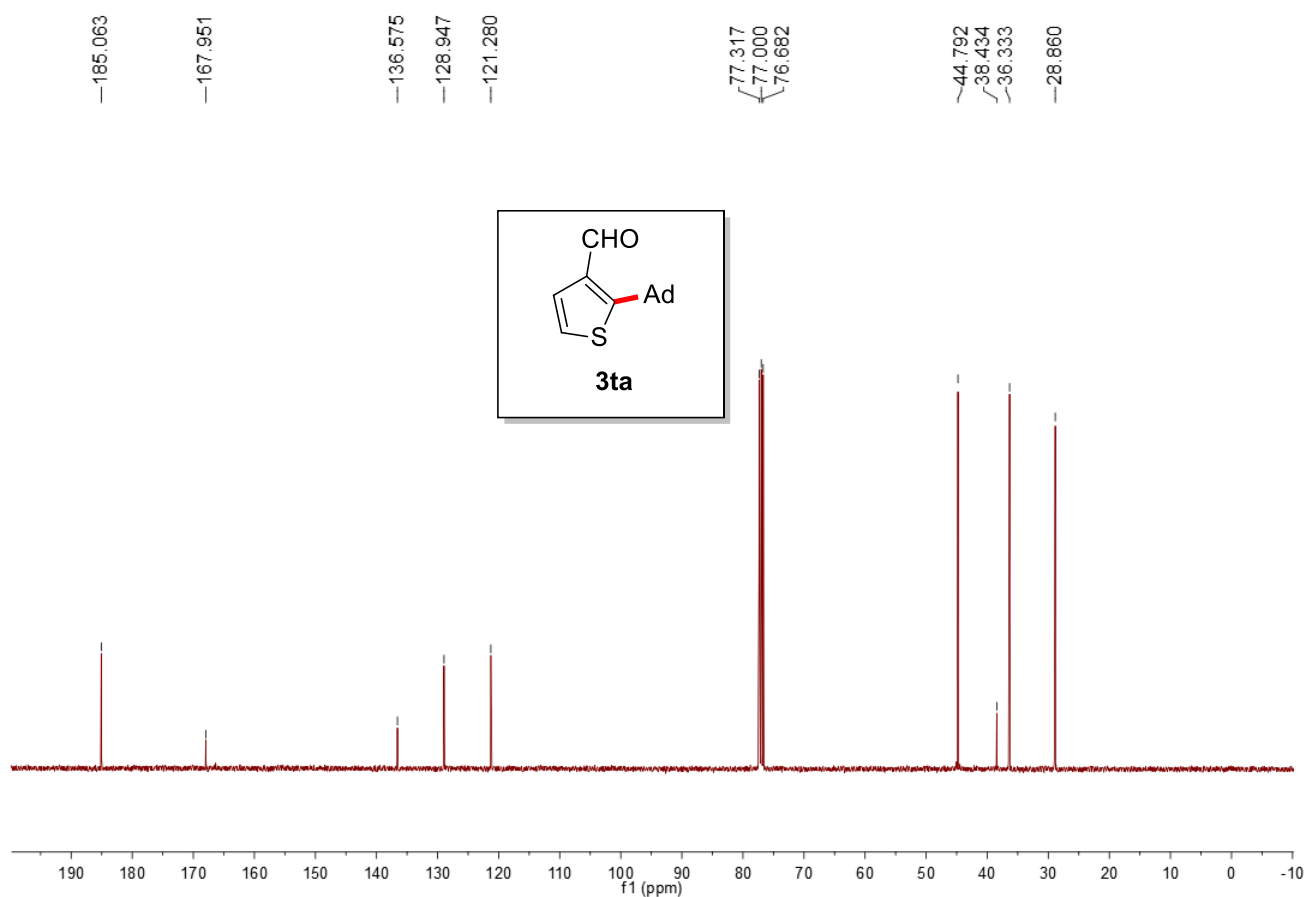

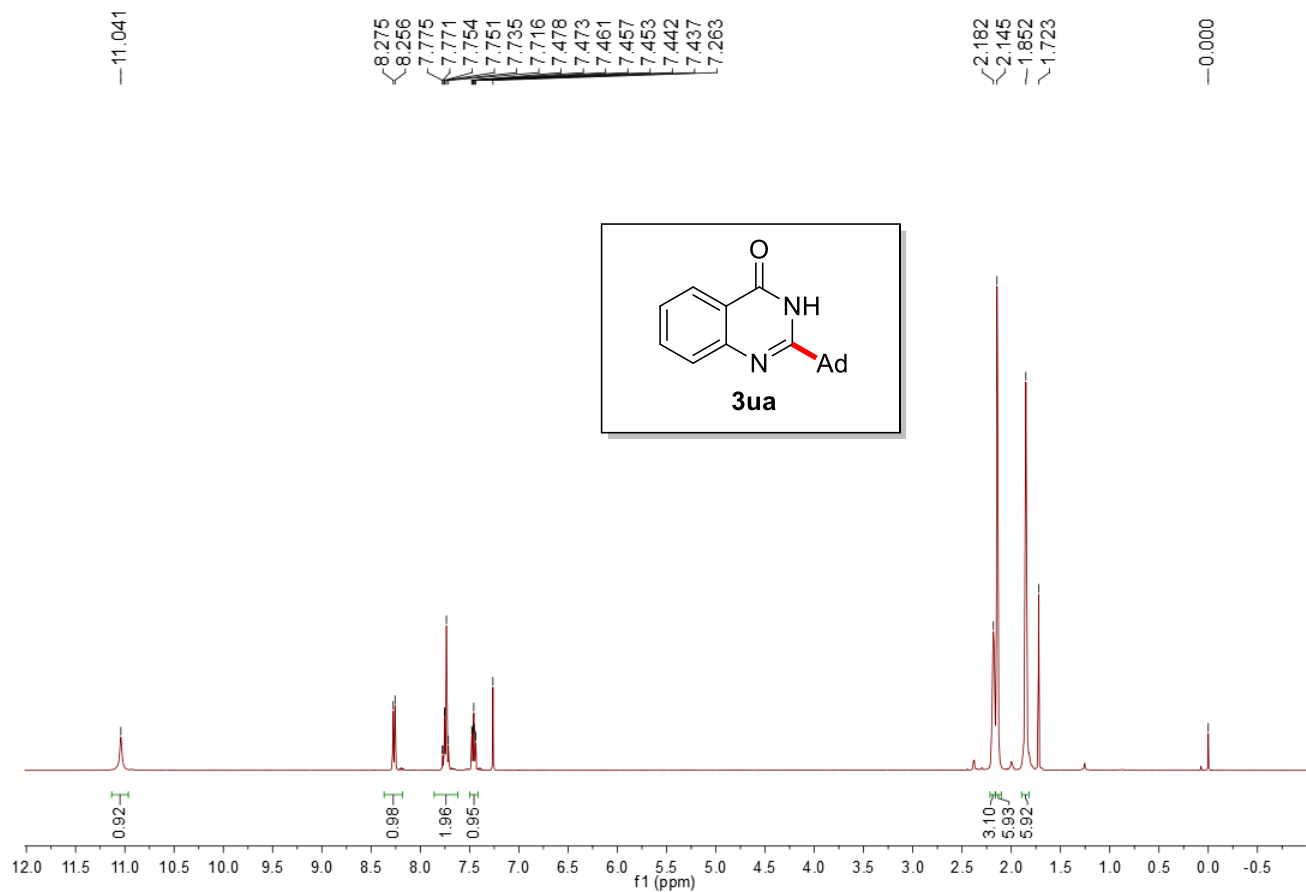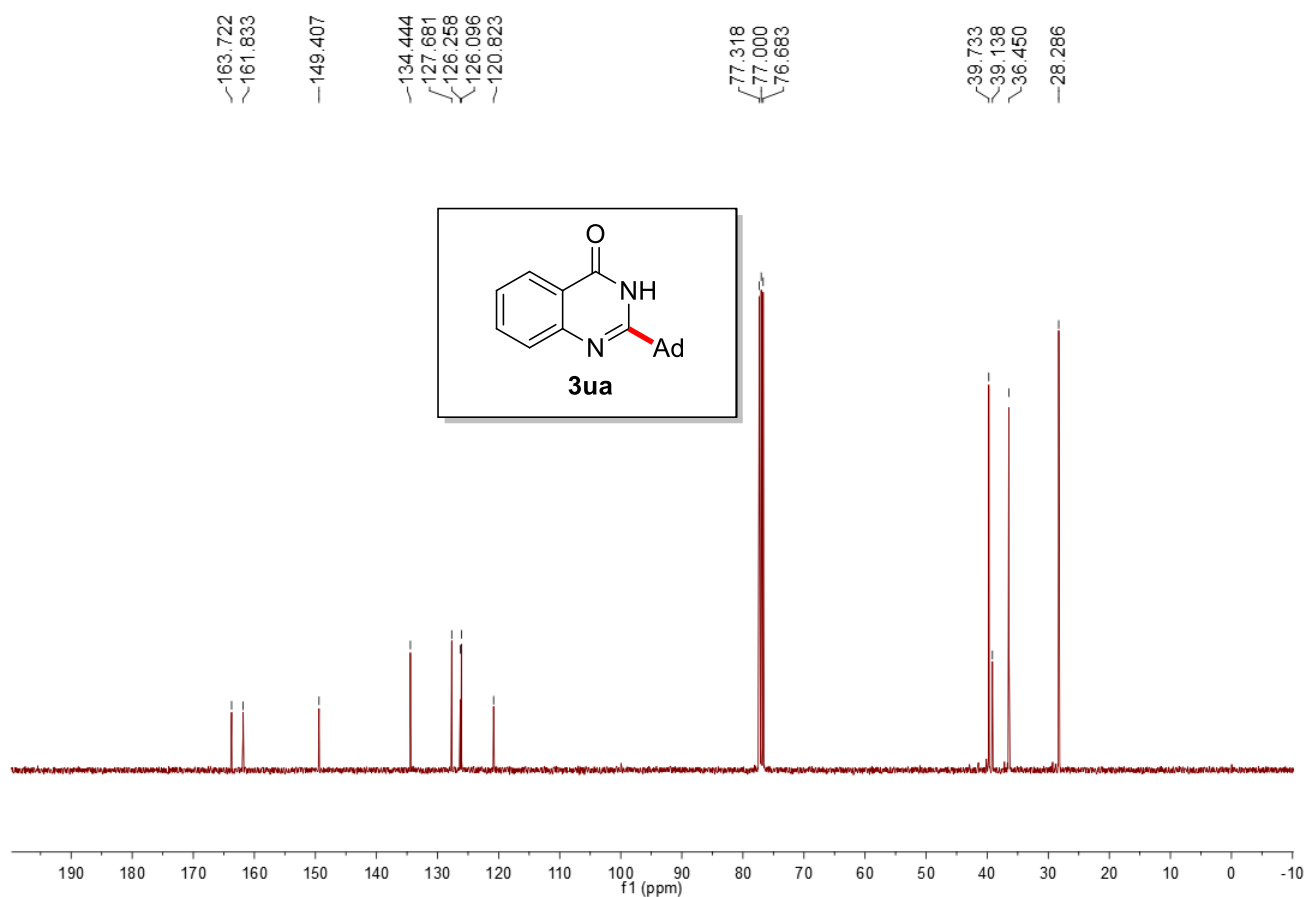

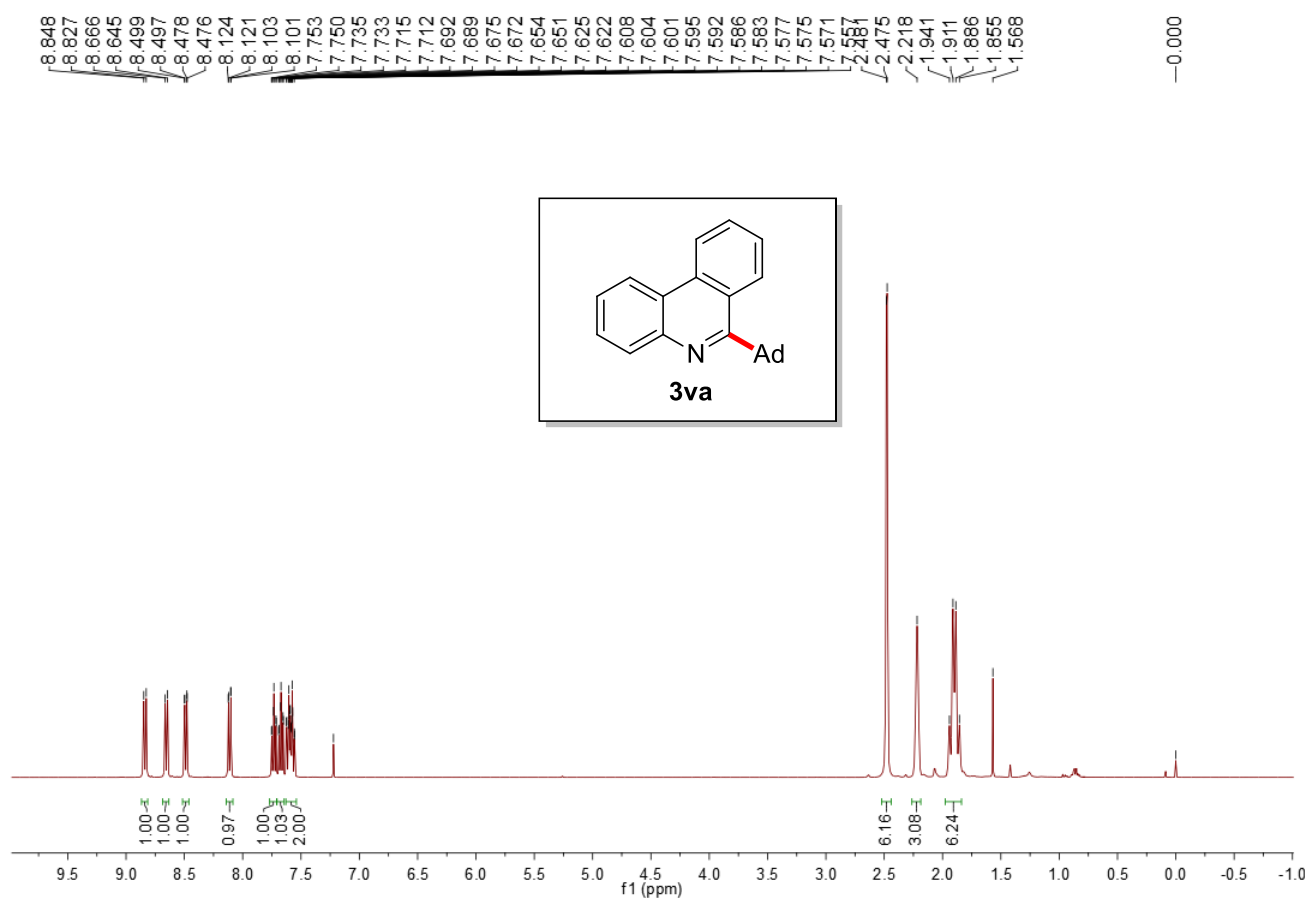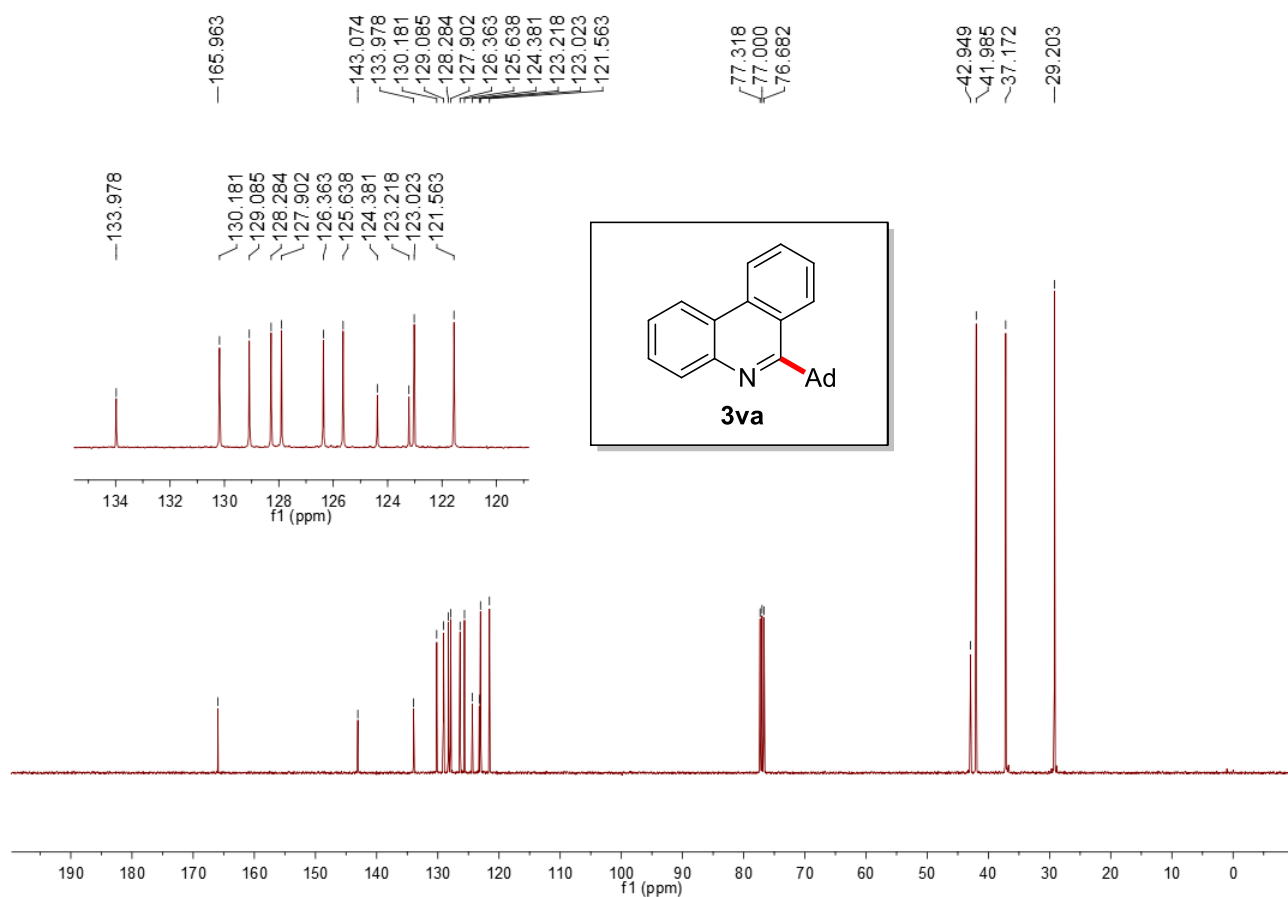

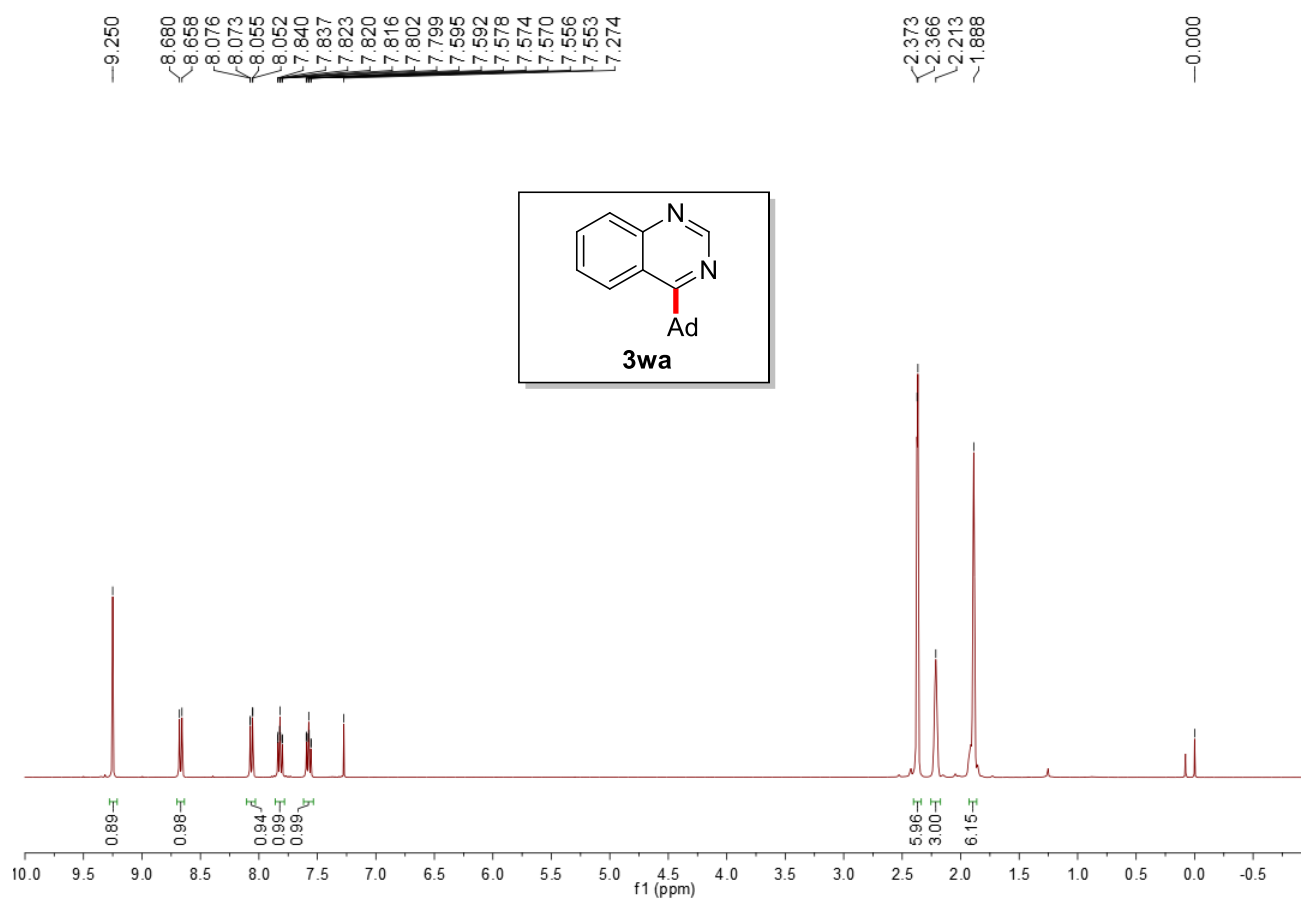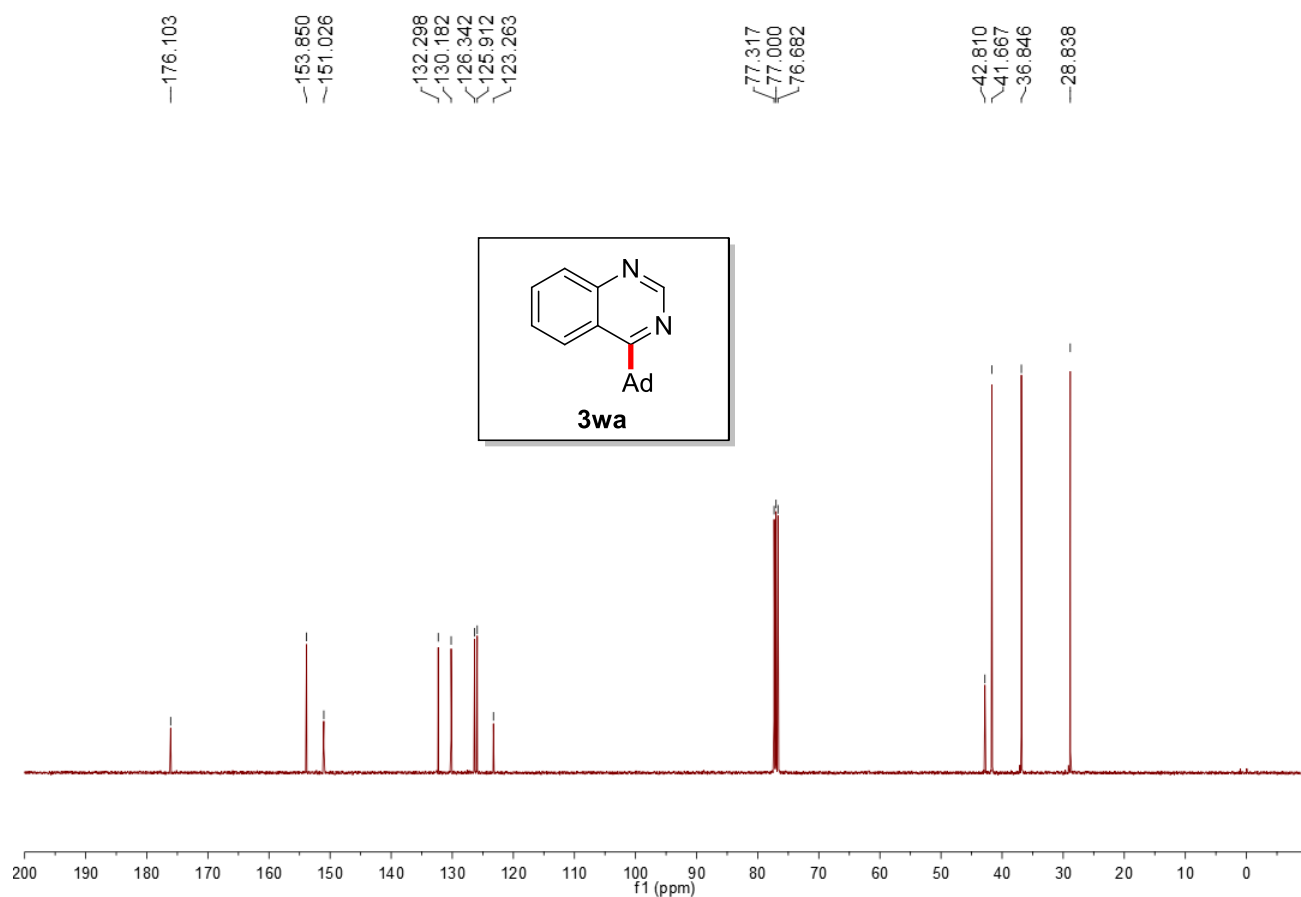

{<sup>1</sup>H-<sup>1</sup>H} COSY (400 MHz, CDCl<sub>3</sub>) of **3wa**:

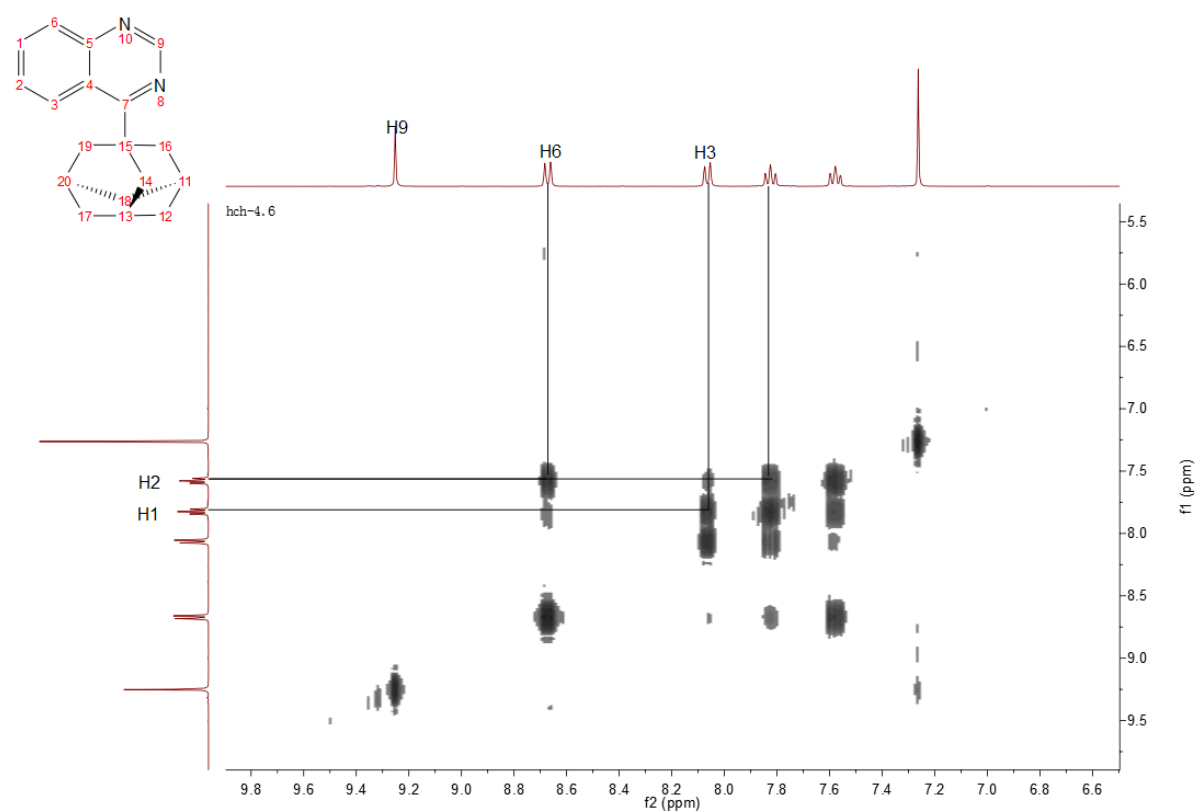

{<sup>1</sup>H-<sup>13</sup>C} HSQC (400 MHz, CDCl<sub>3</sub>) of **3wa**:

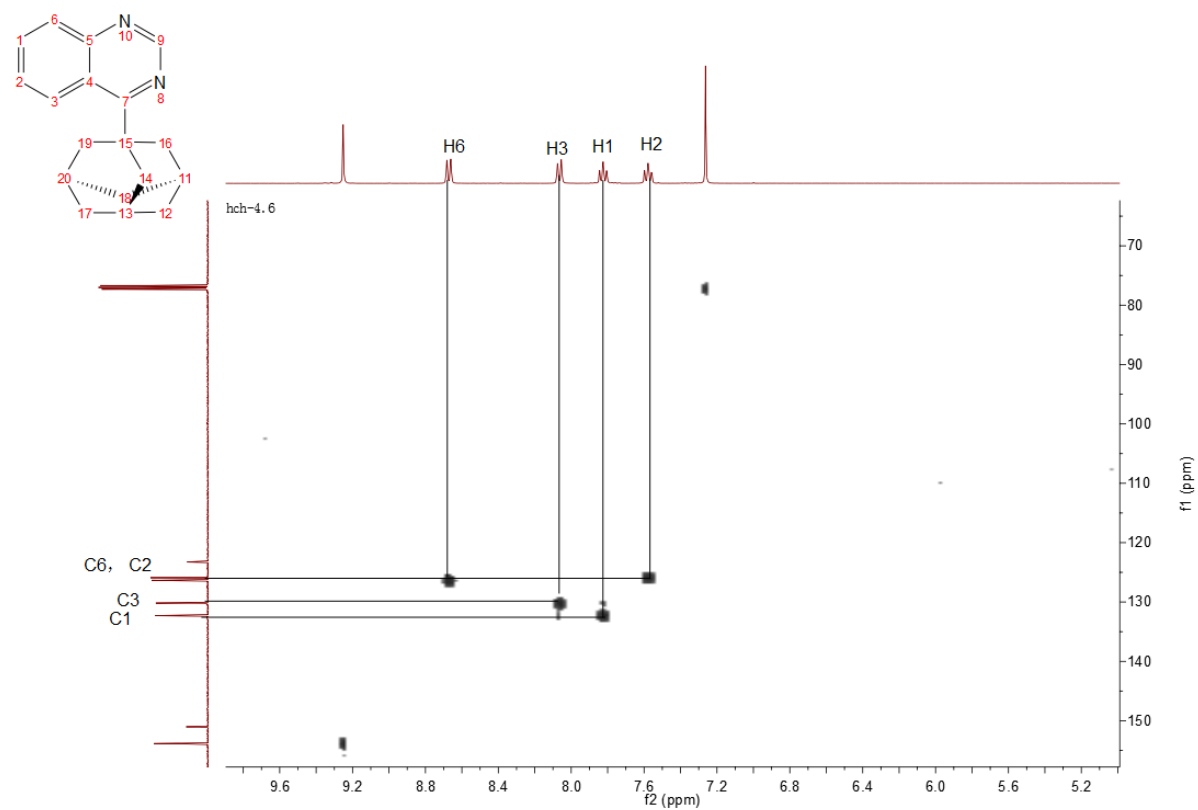

{<sup>1</sup>H-<sup>13</sup>C} HMBC (400 MHz, CDCl<sub>3</sub>) of **3wa**:

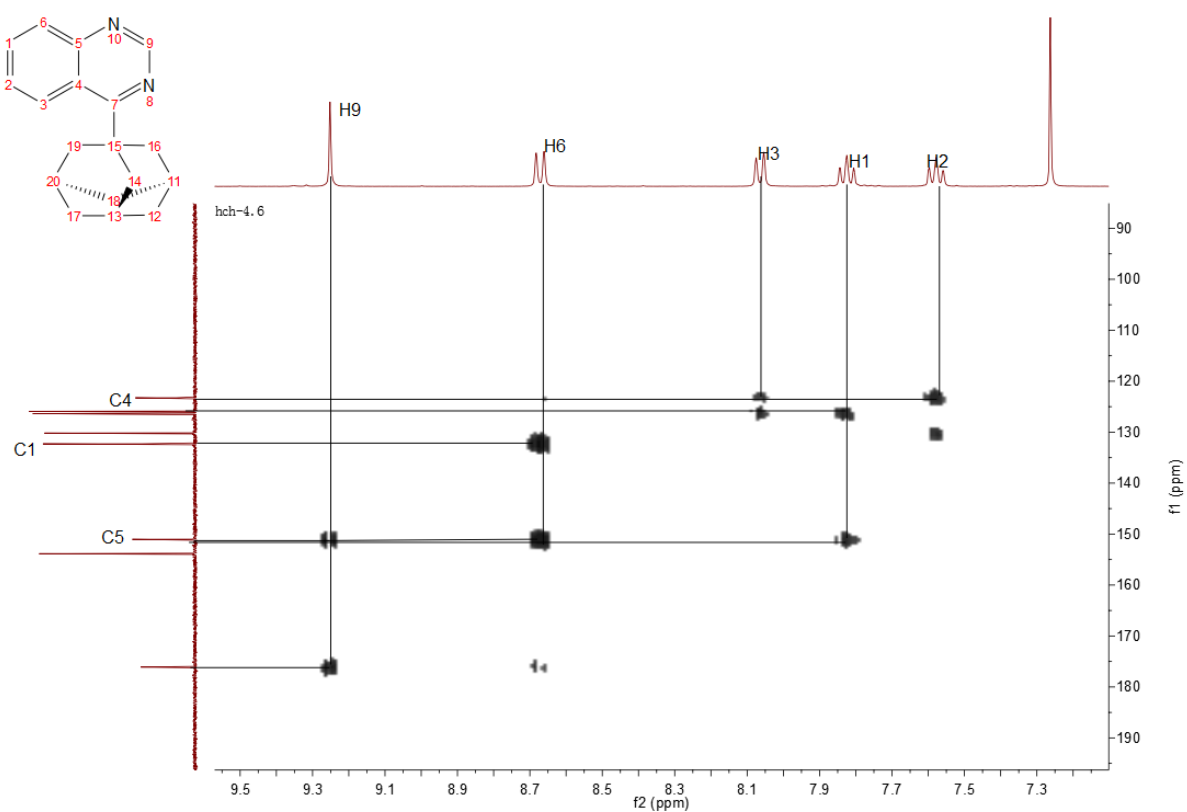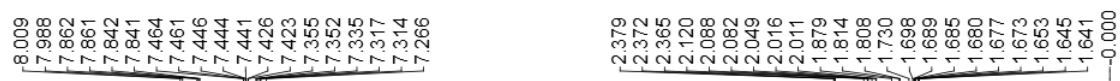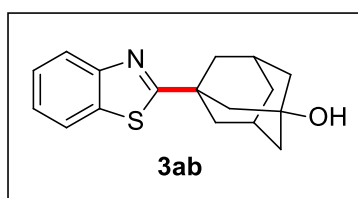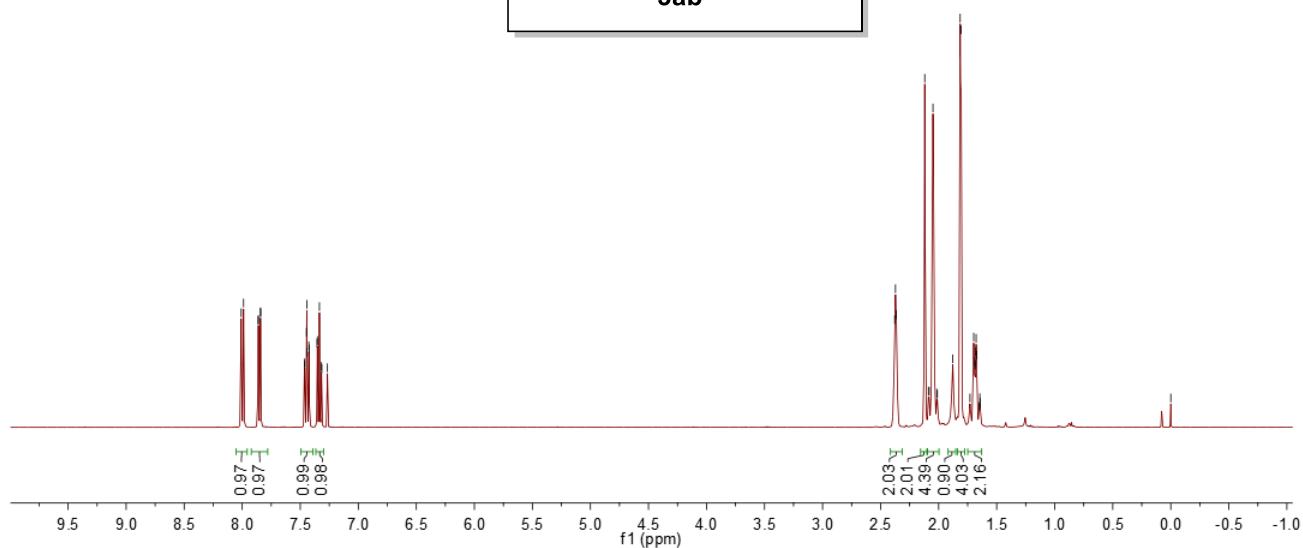

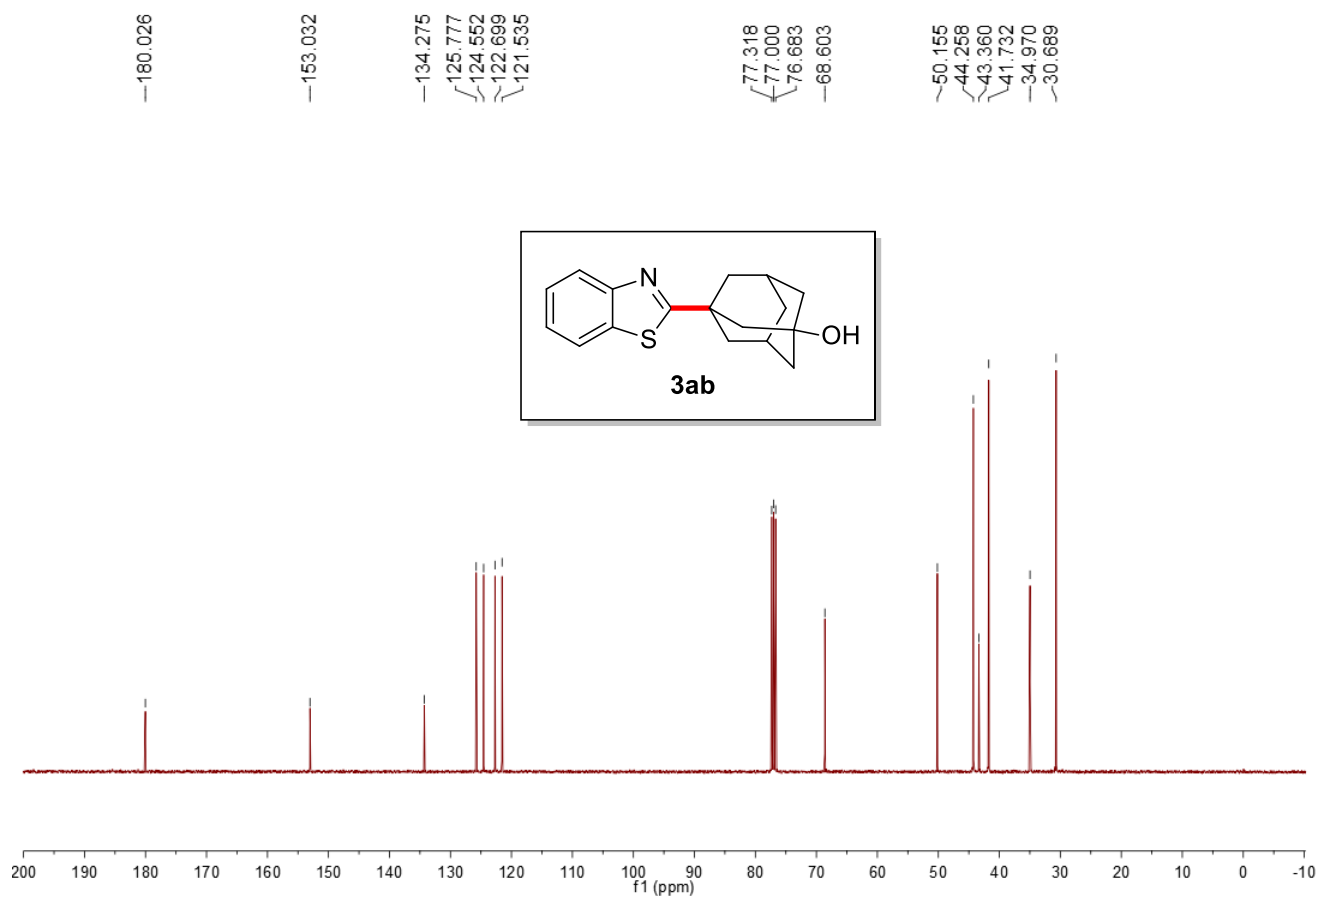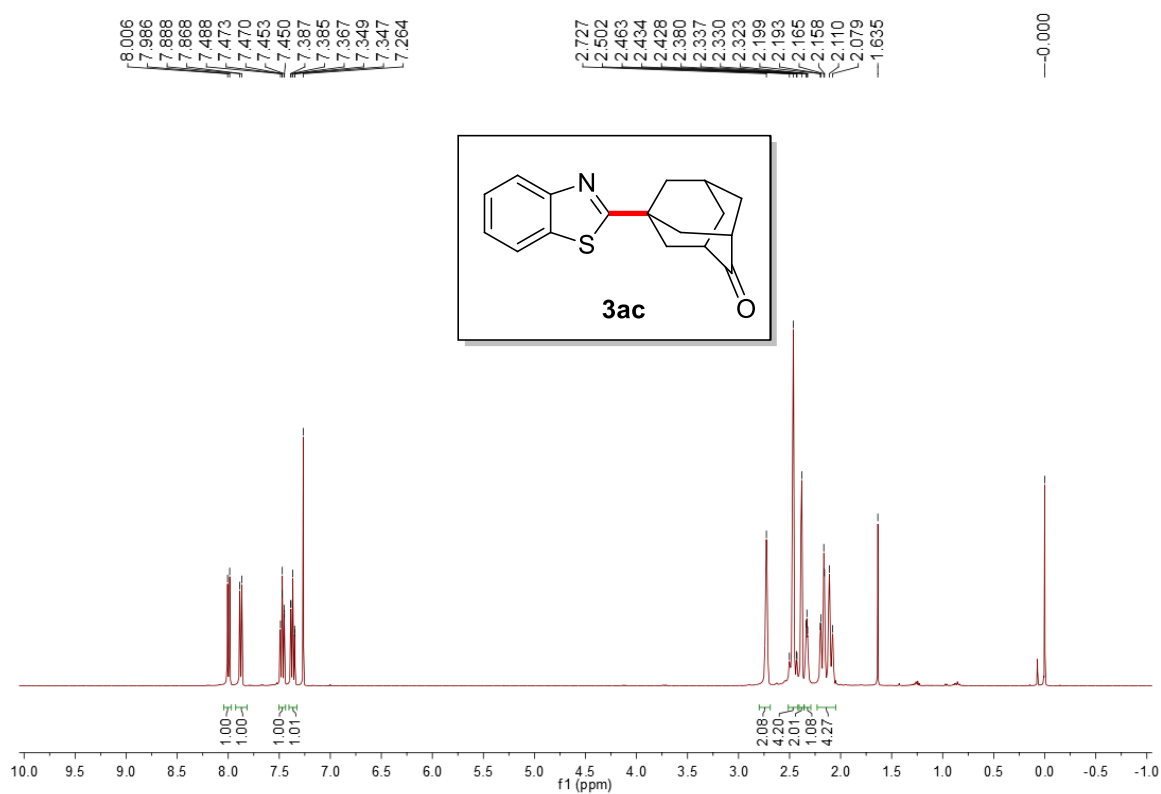



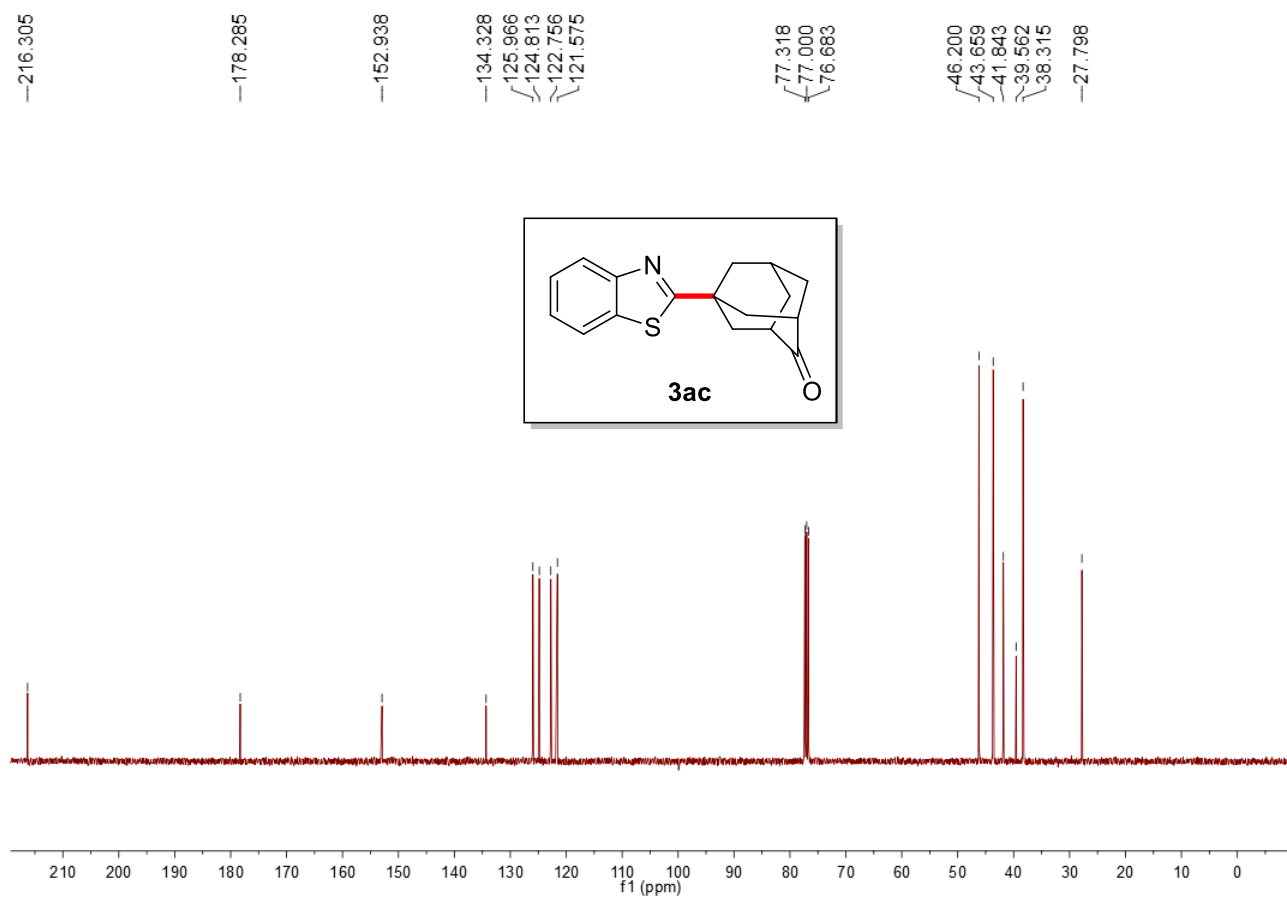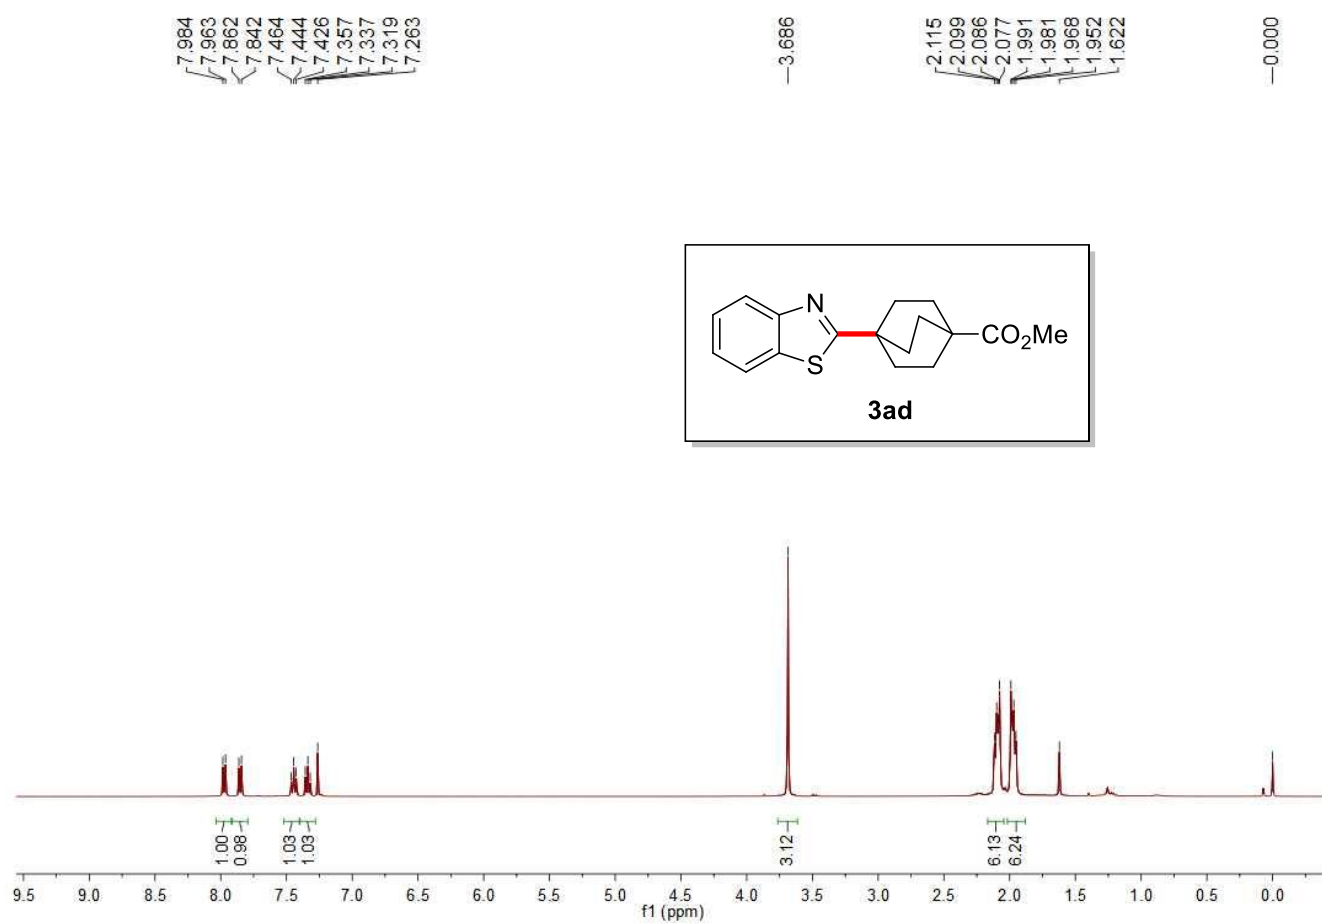

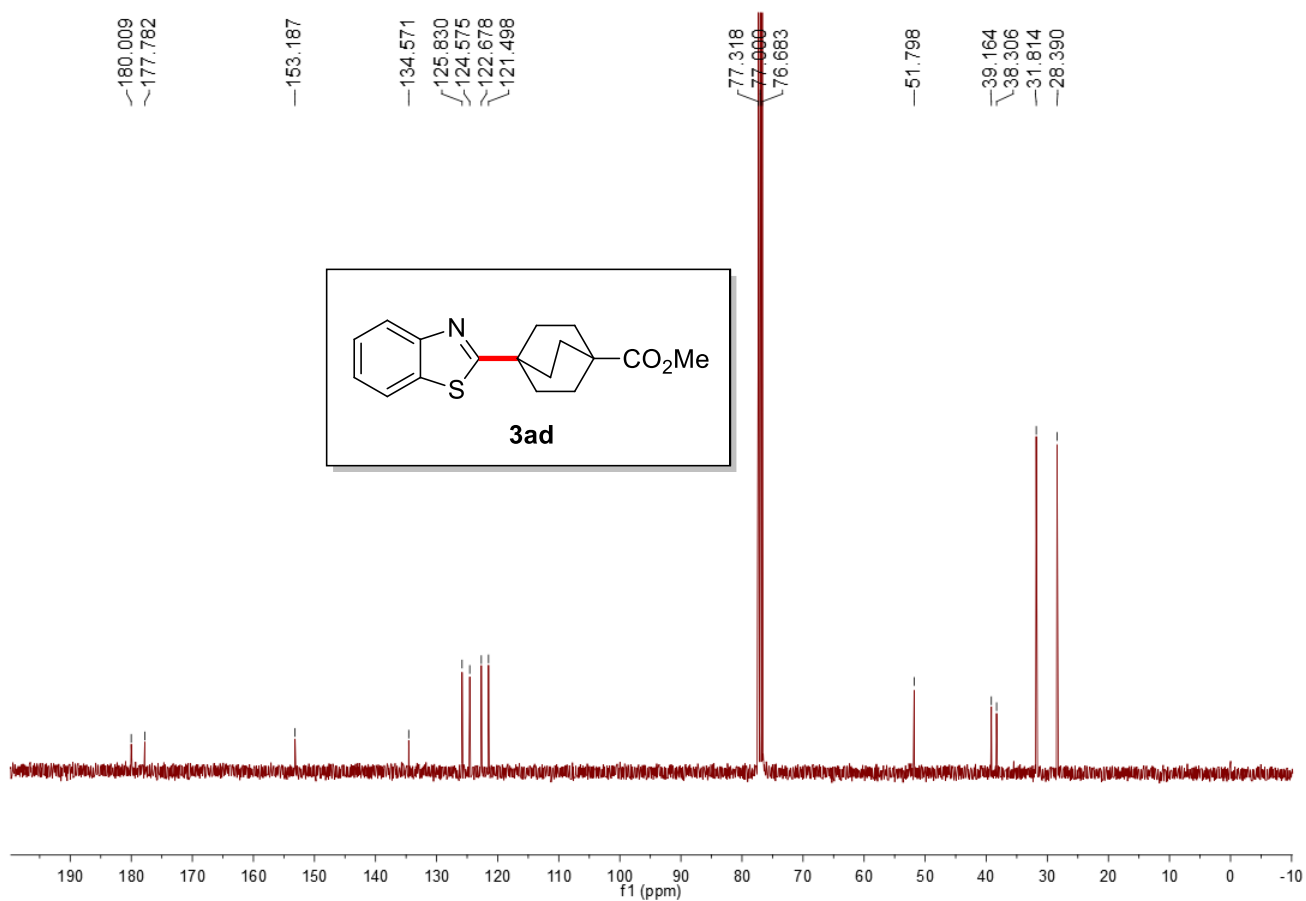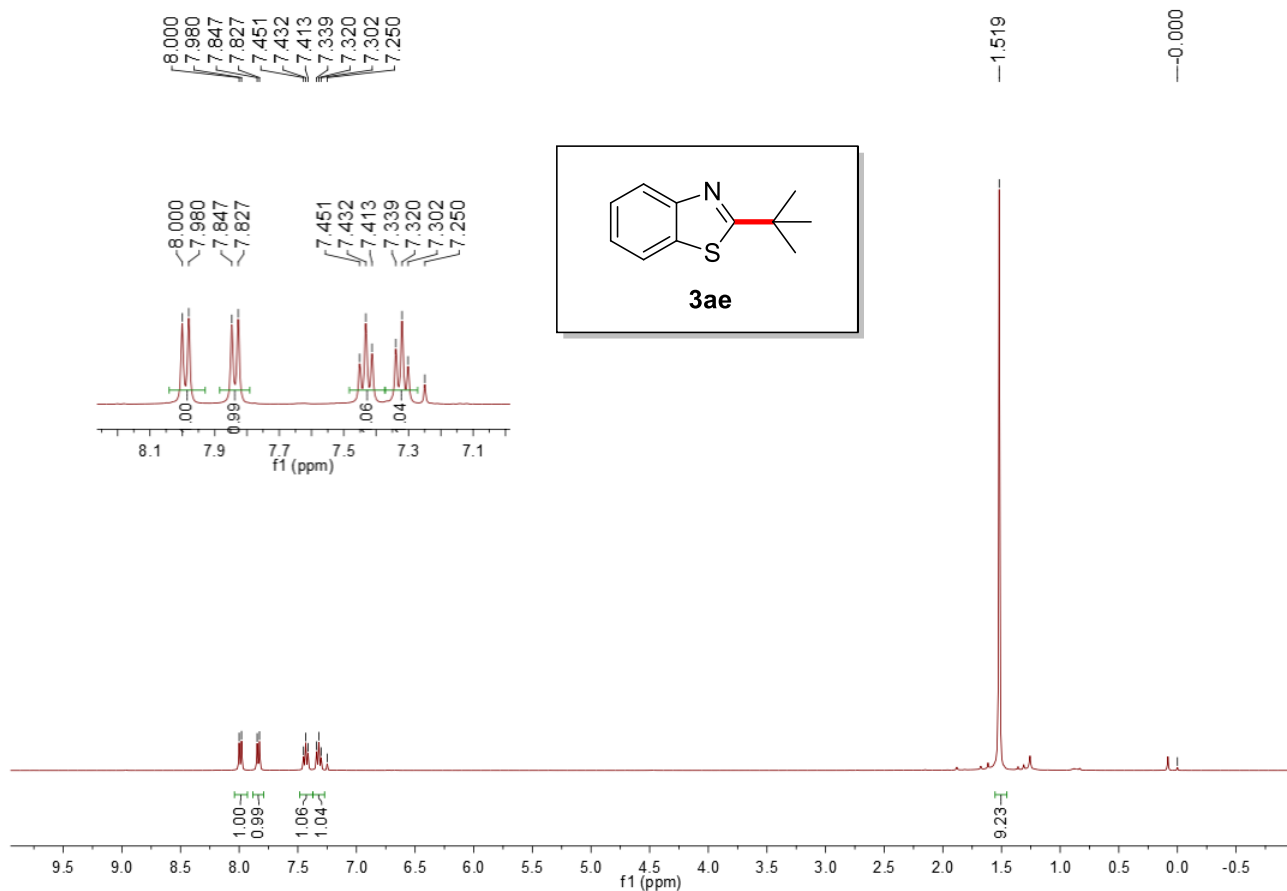

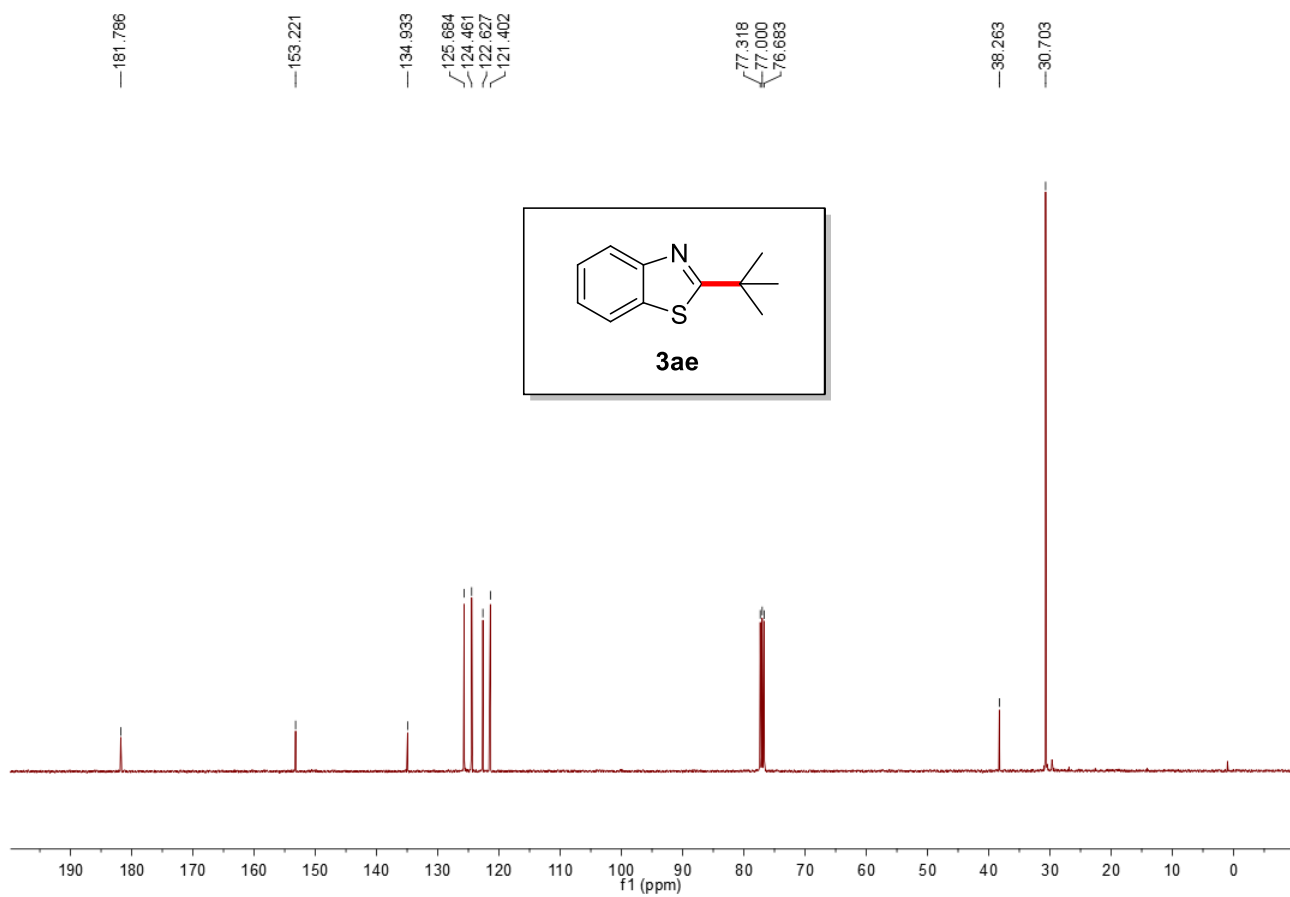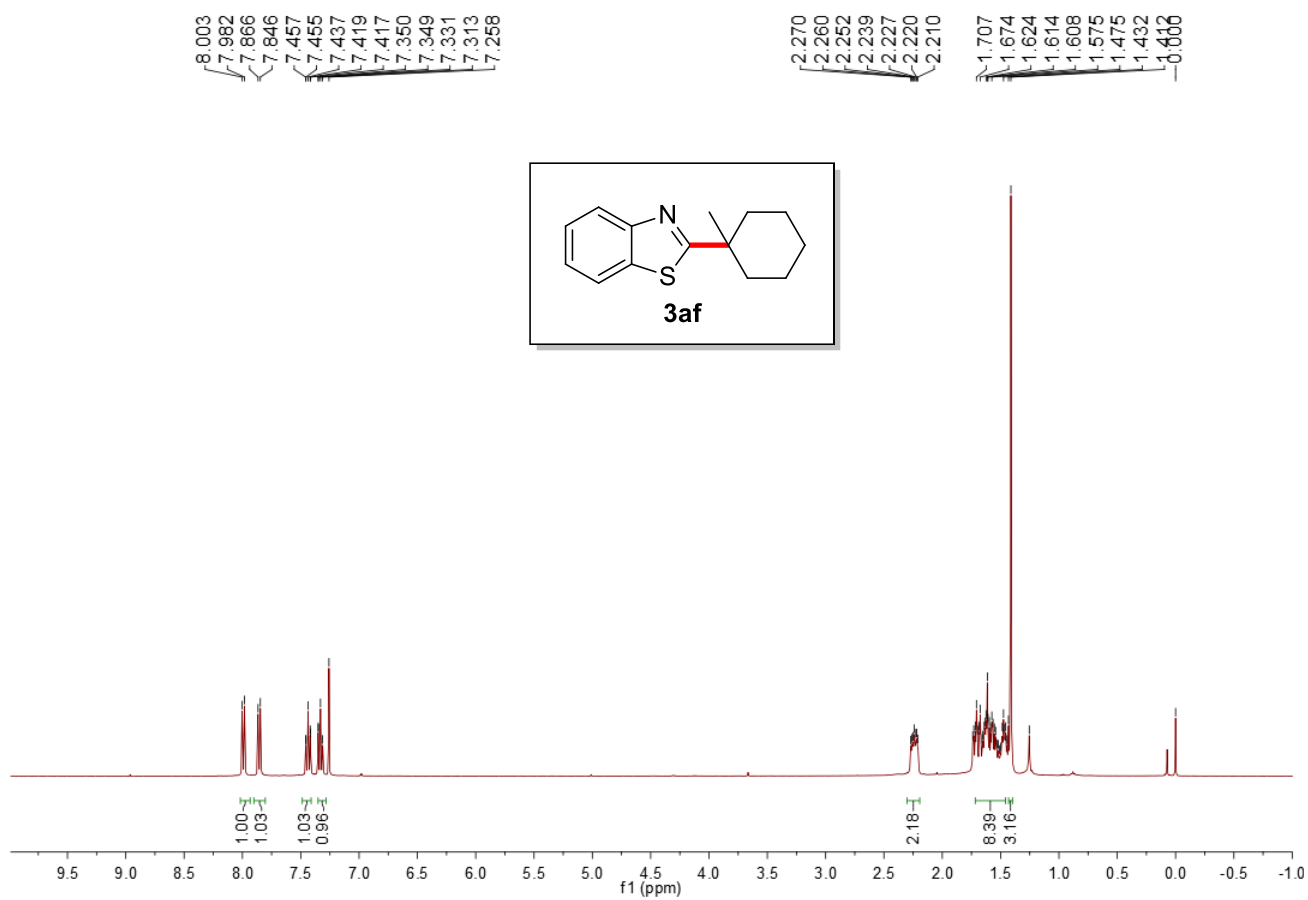



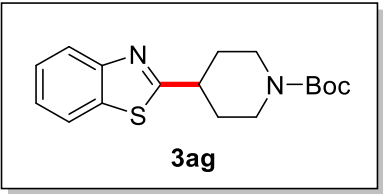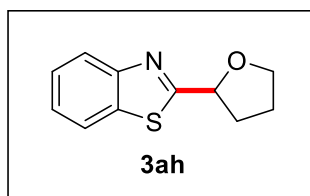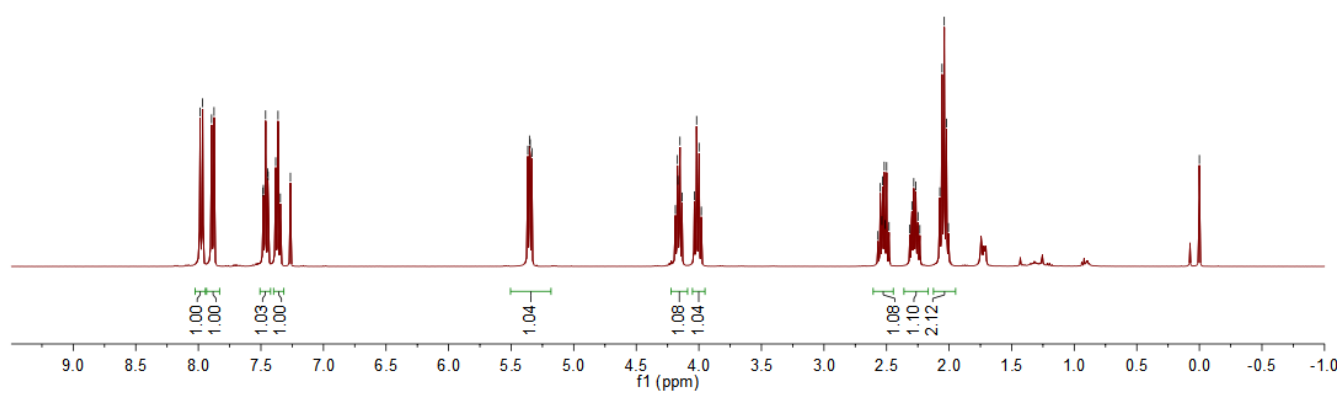

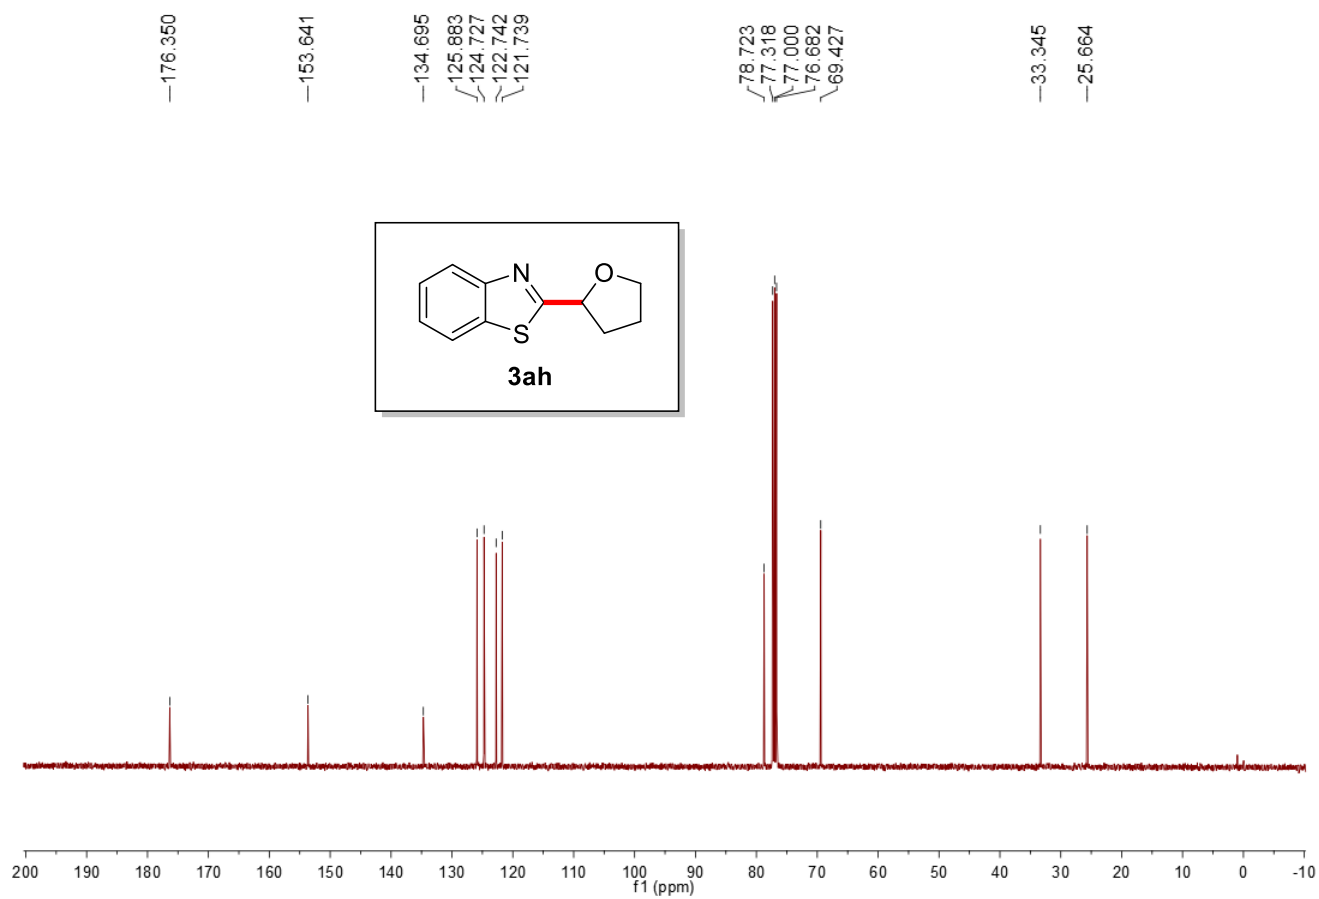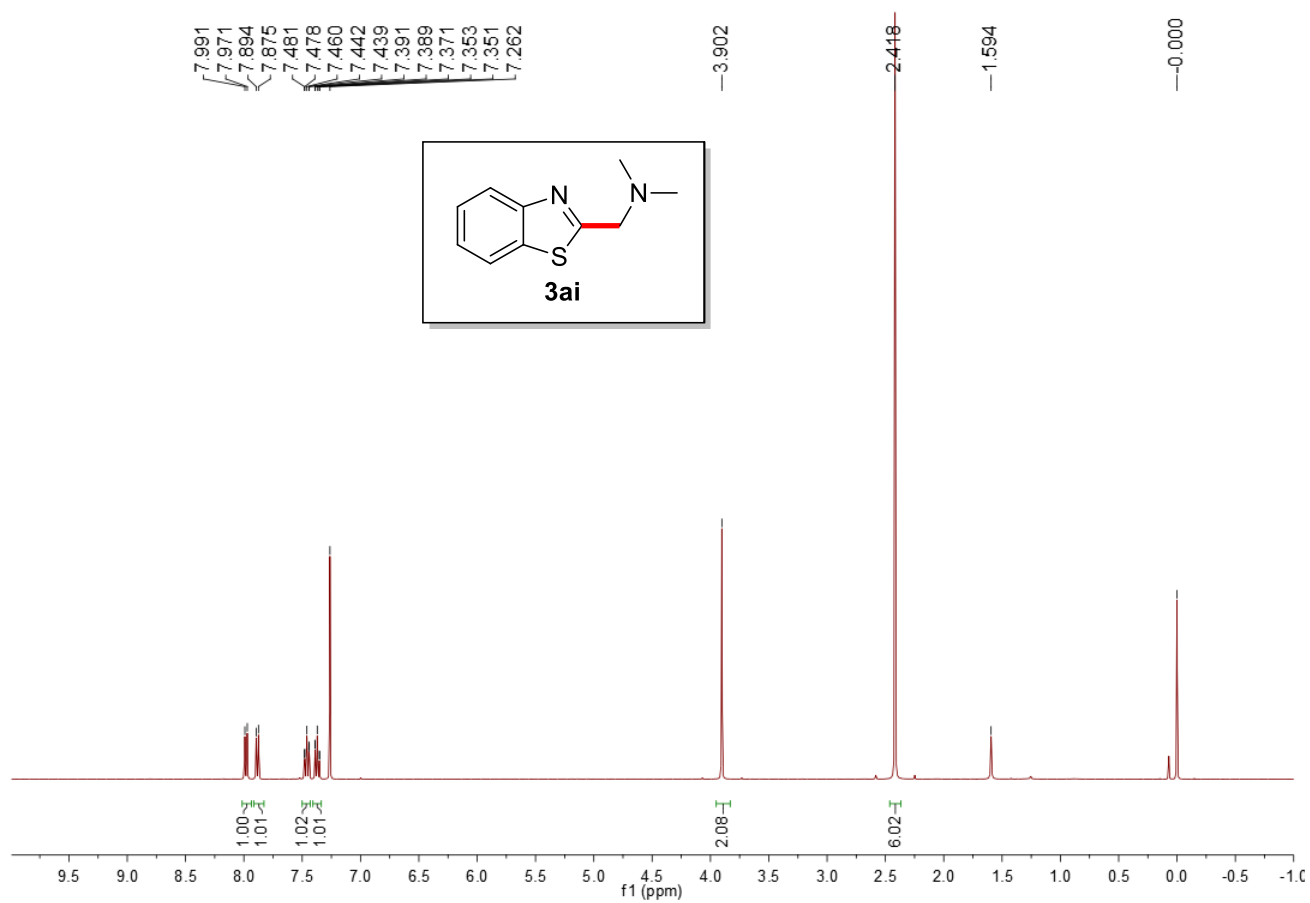

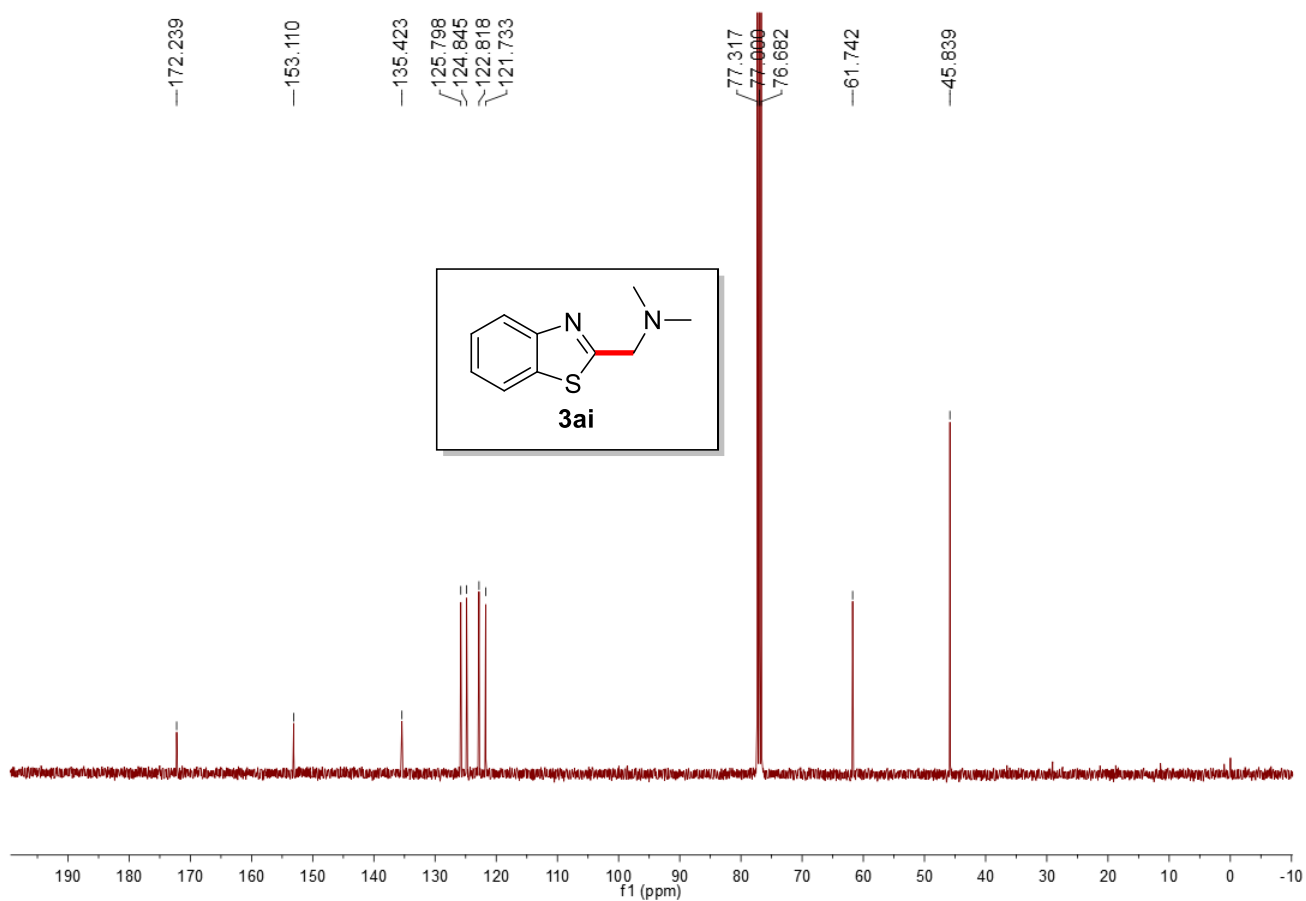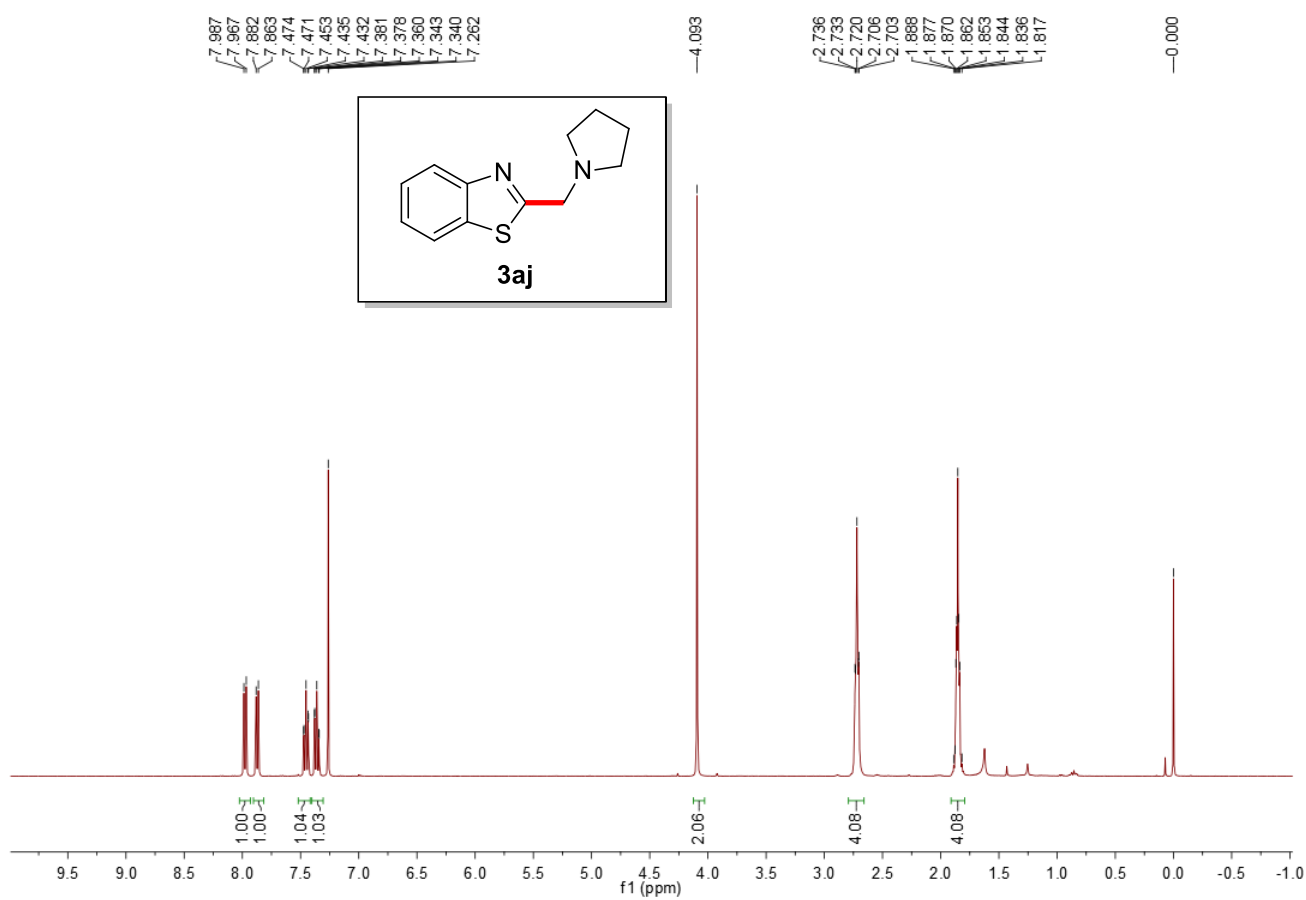

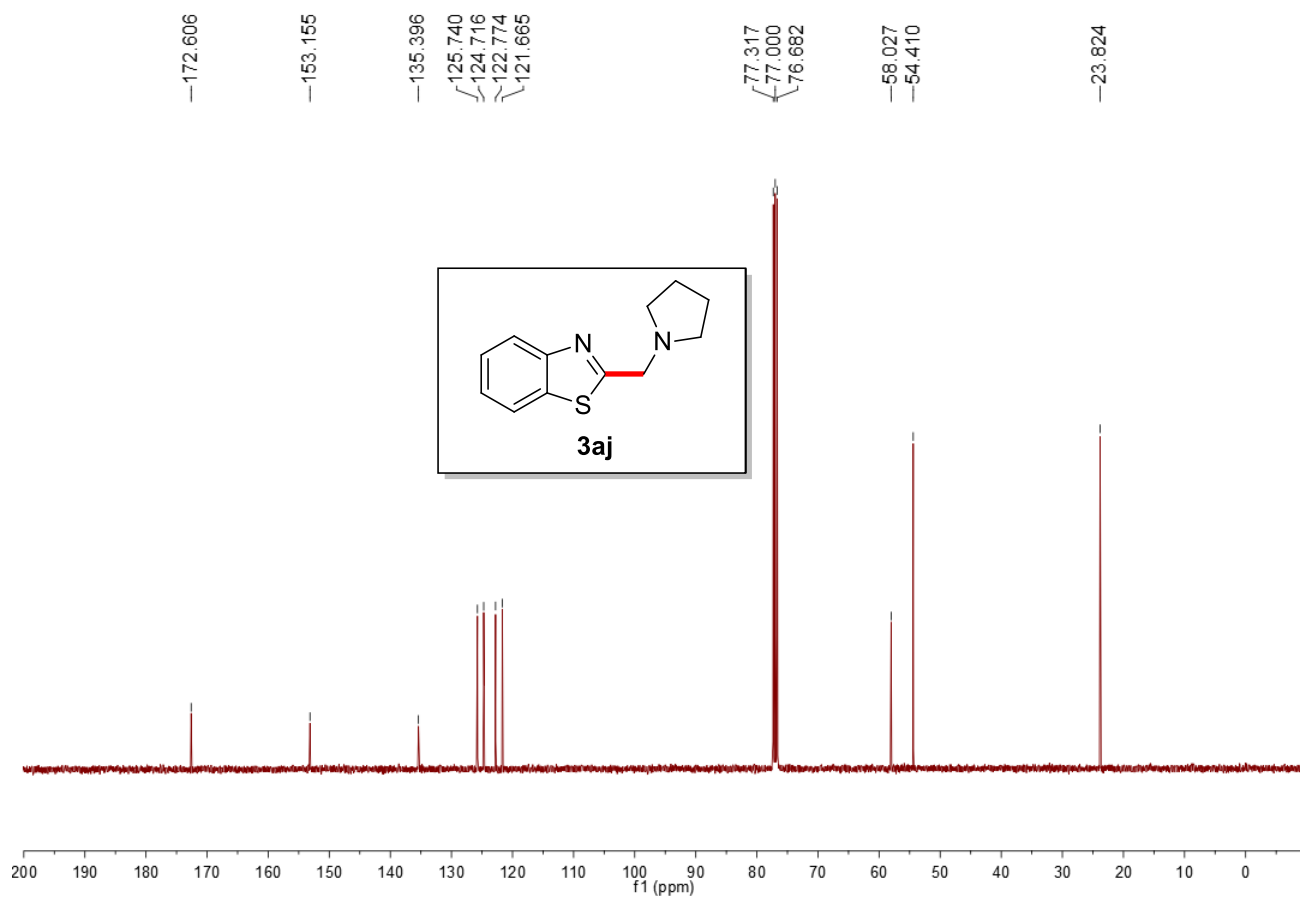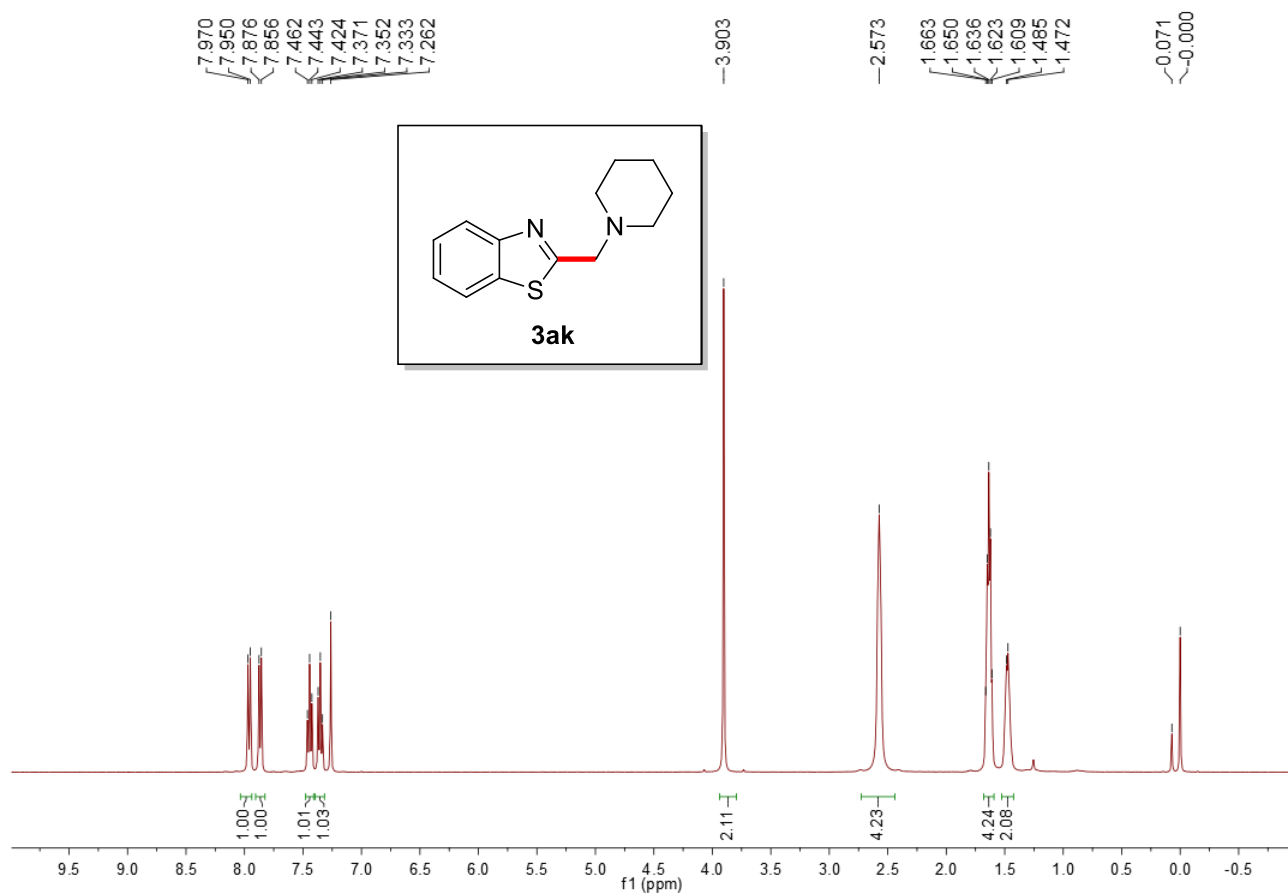



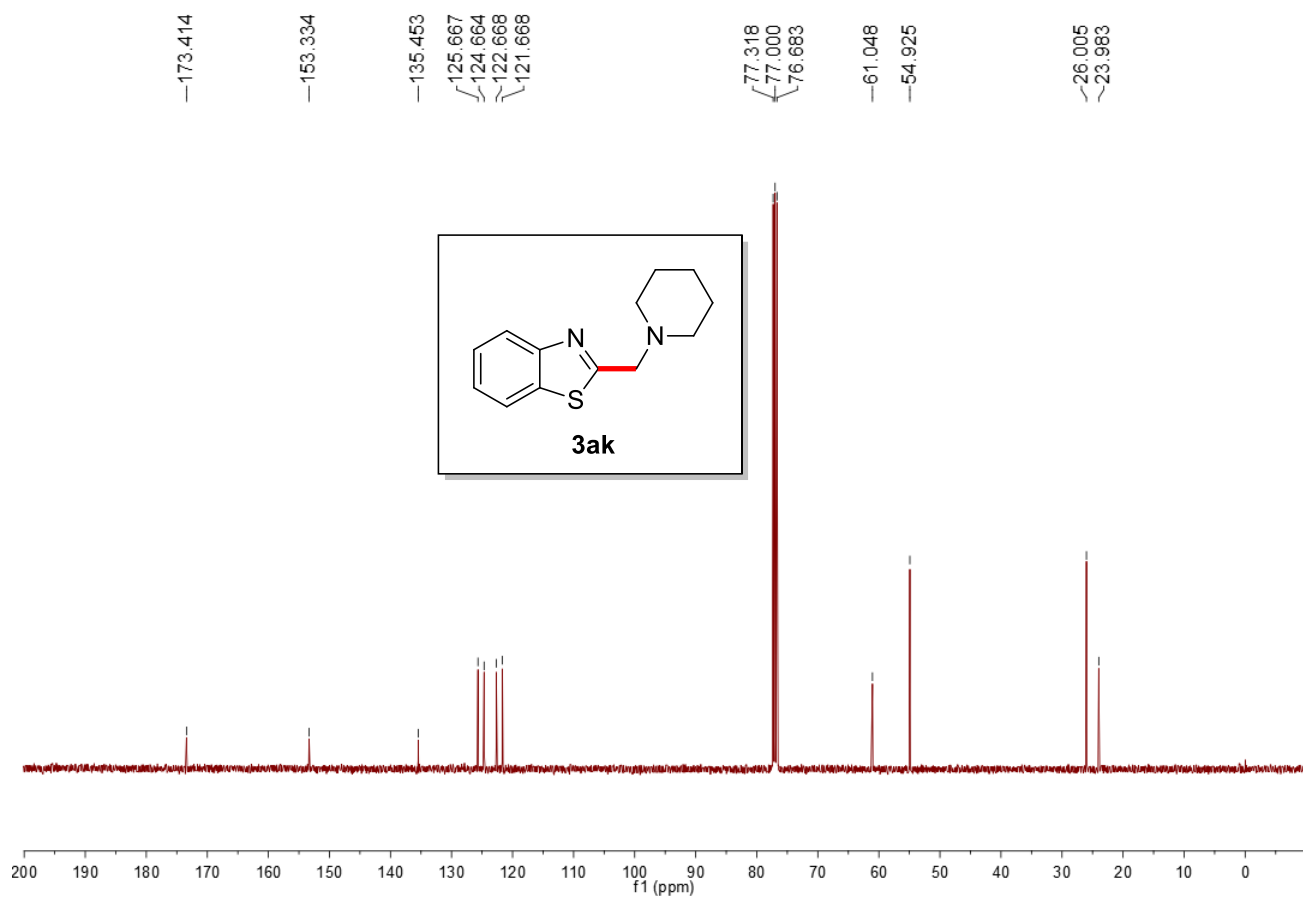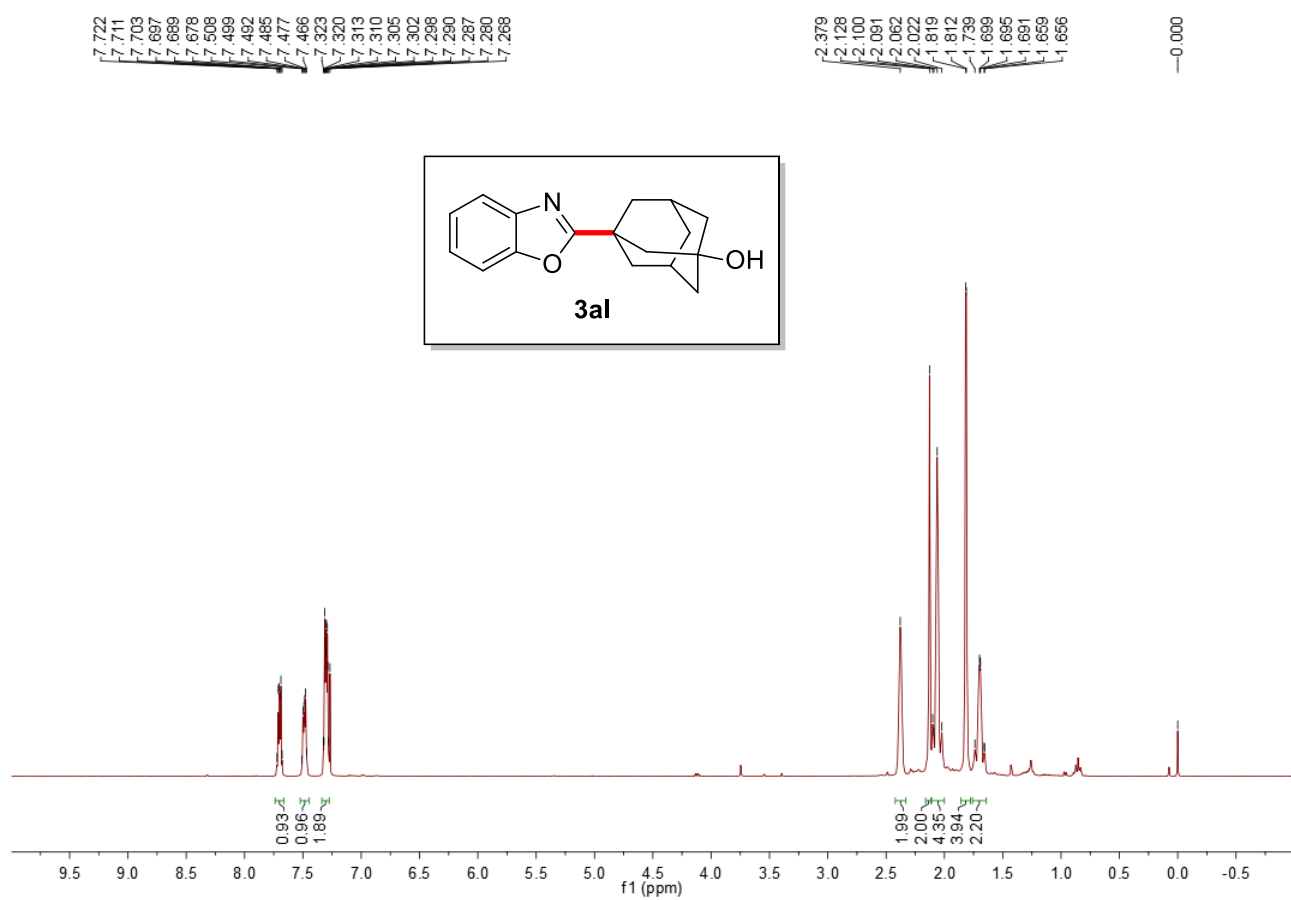

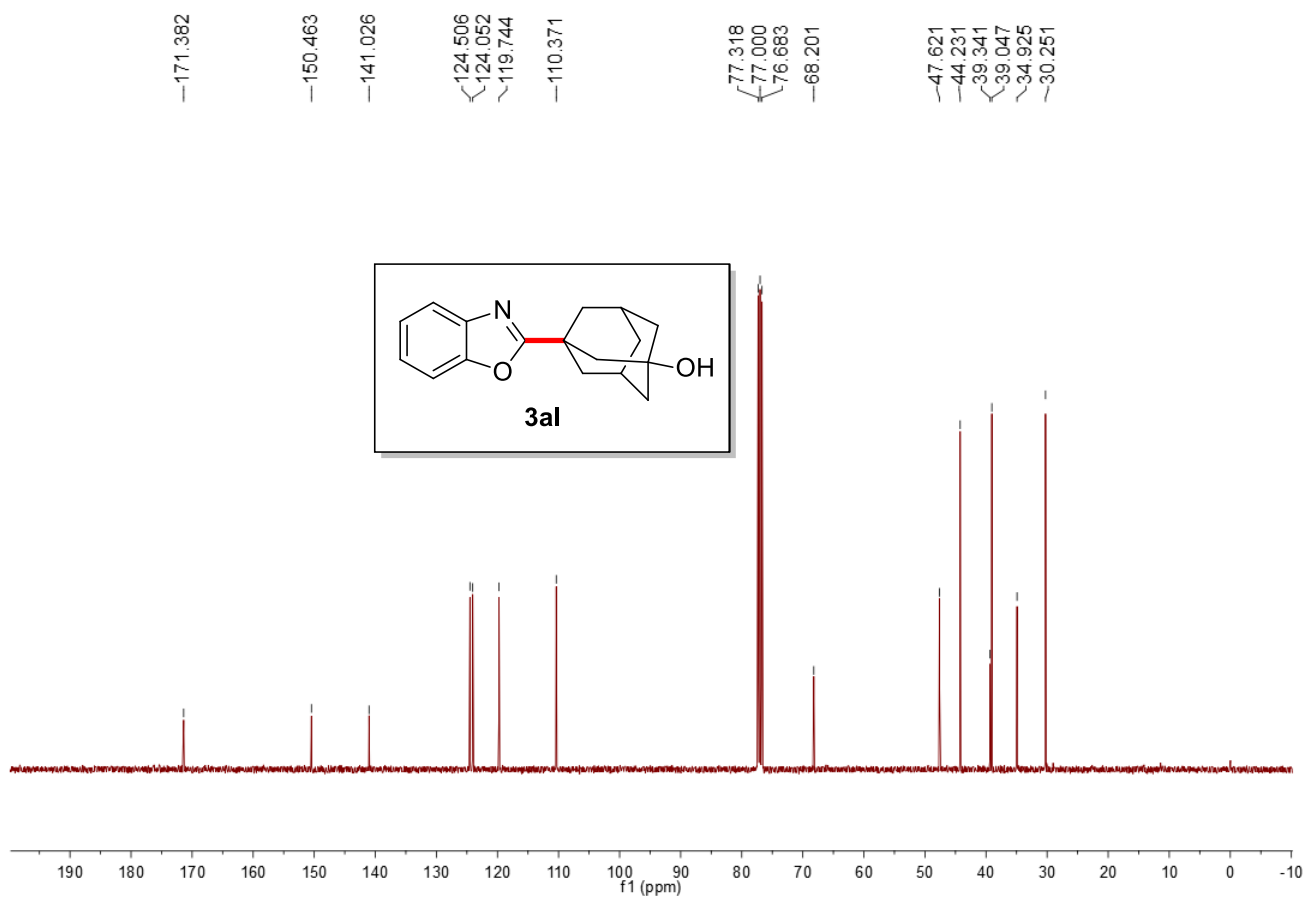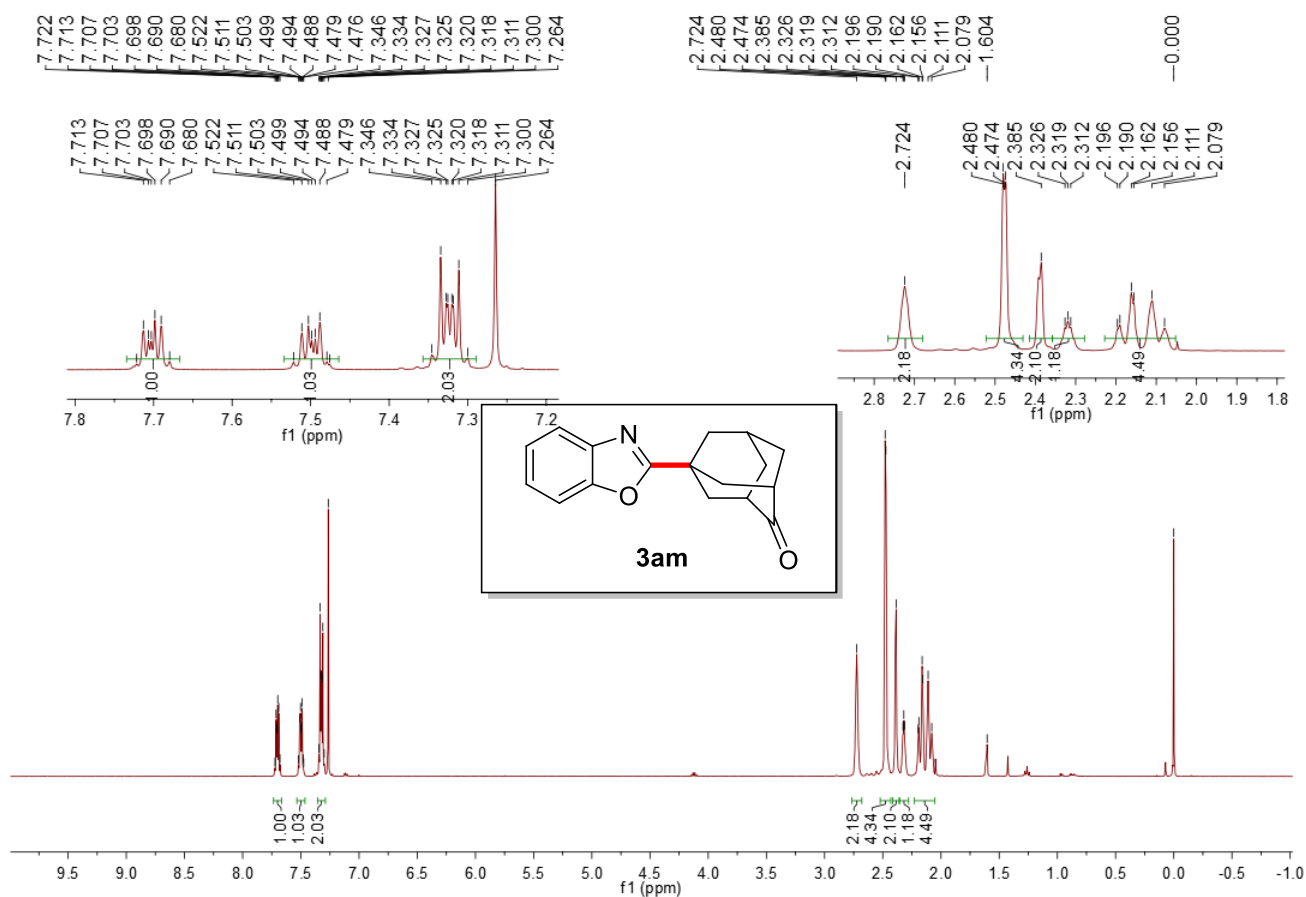

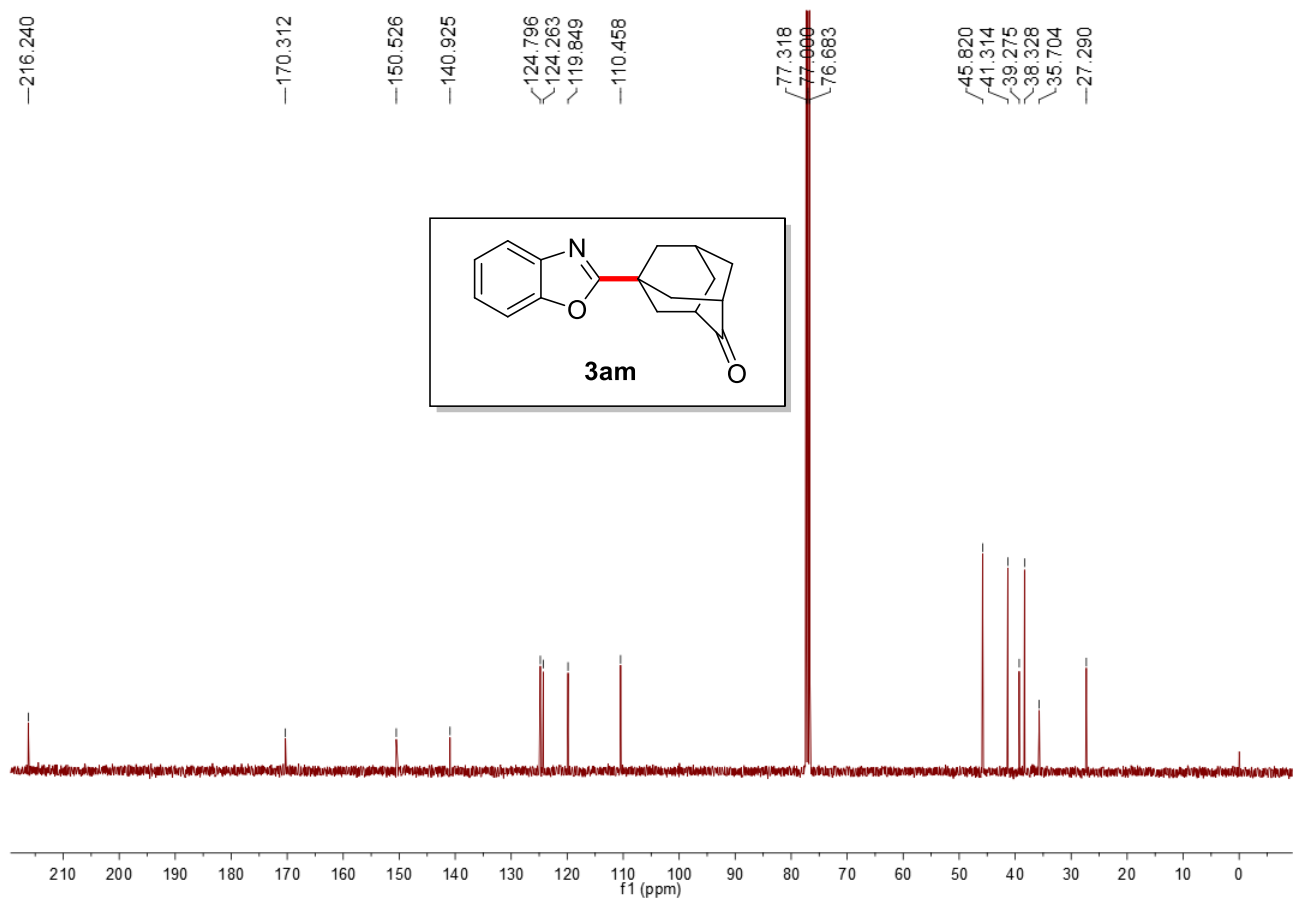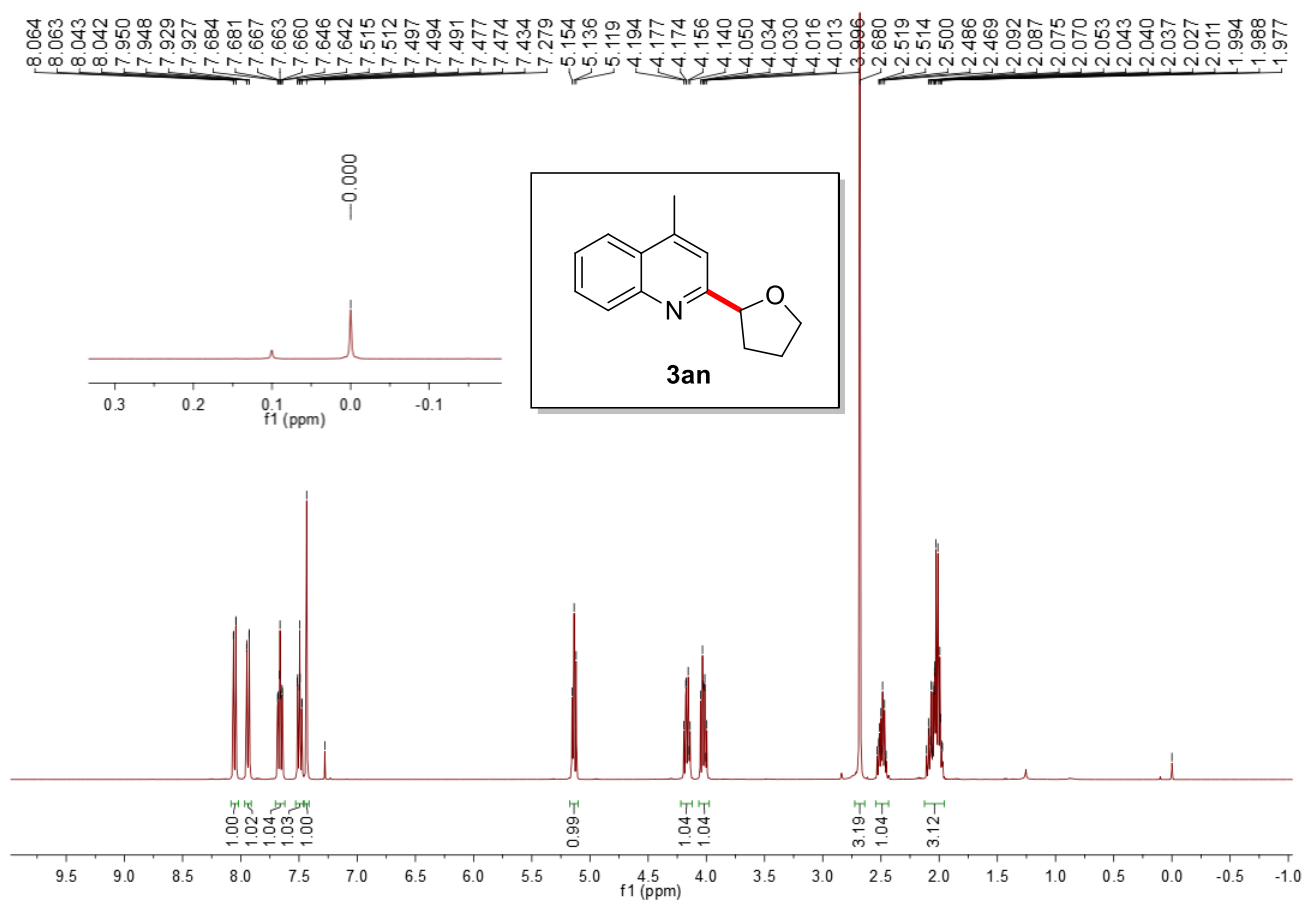

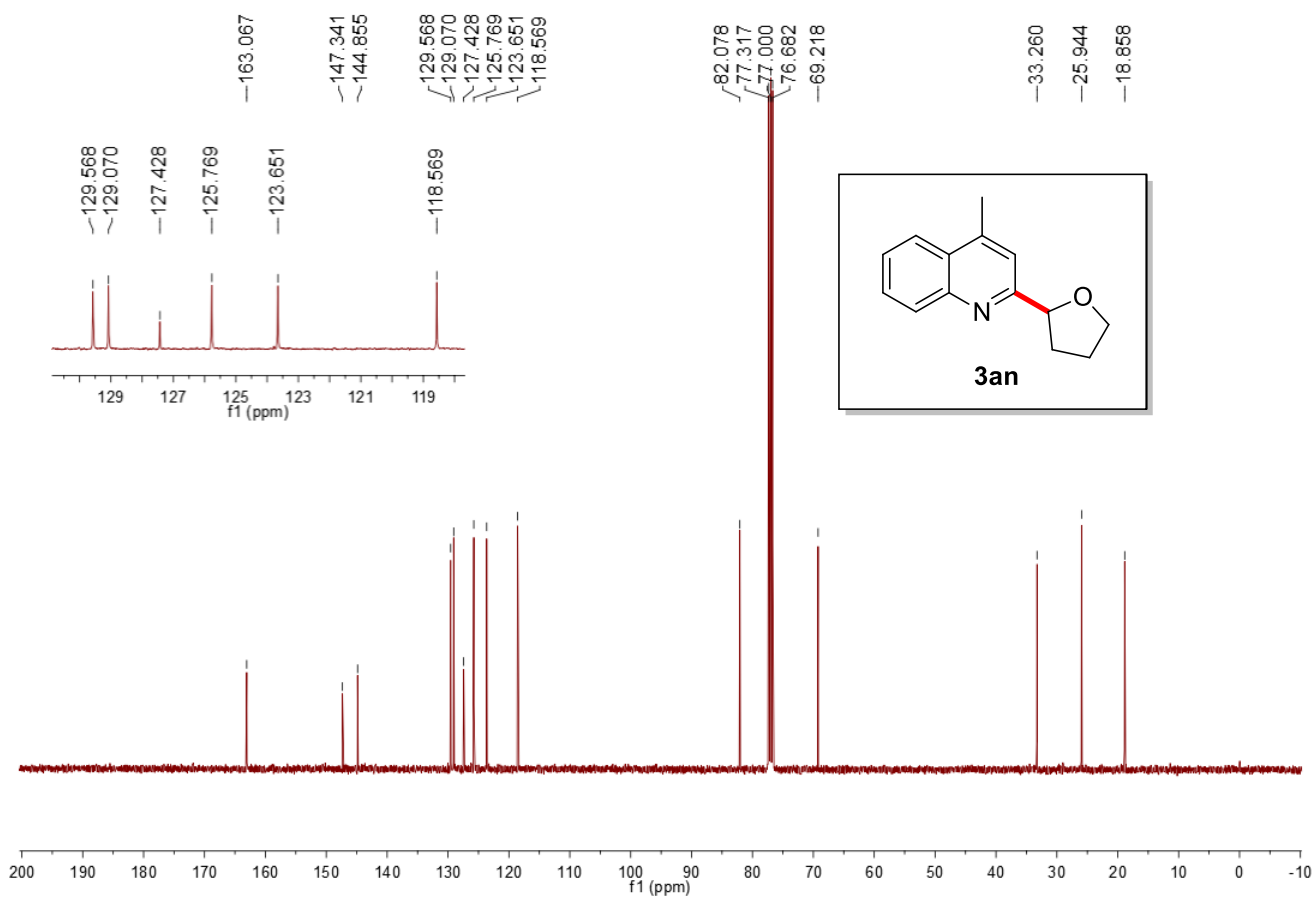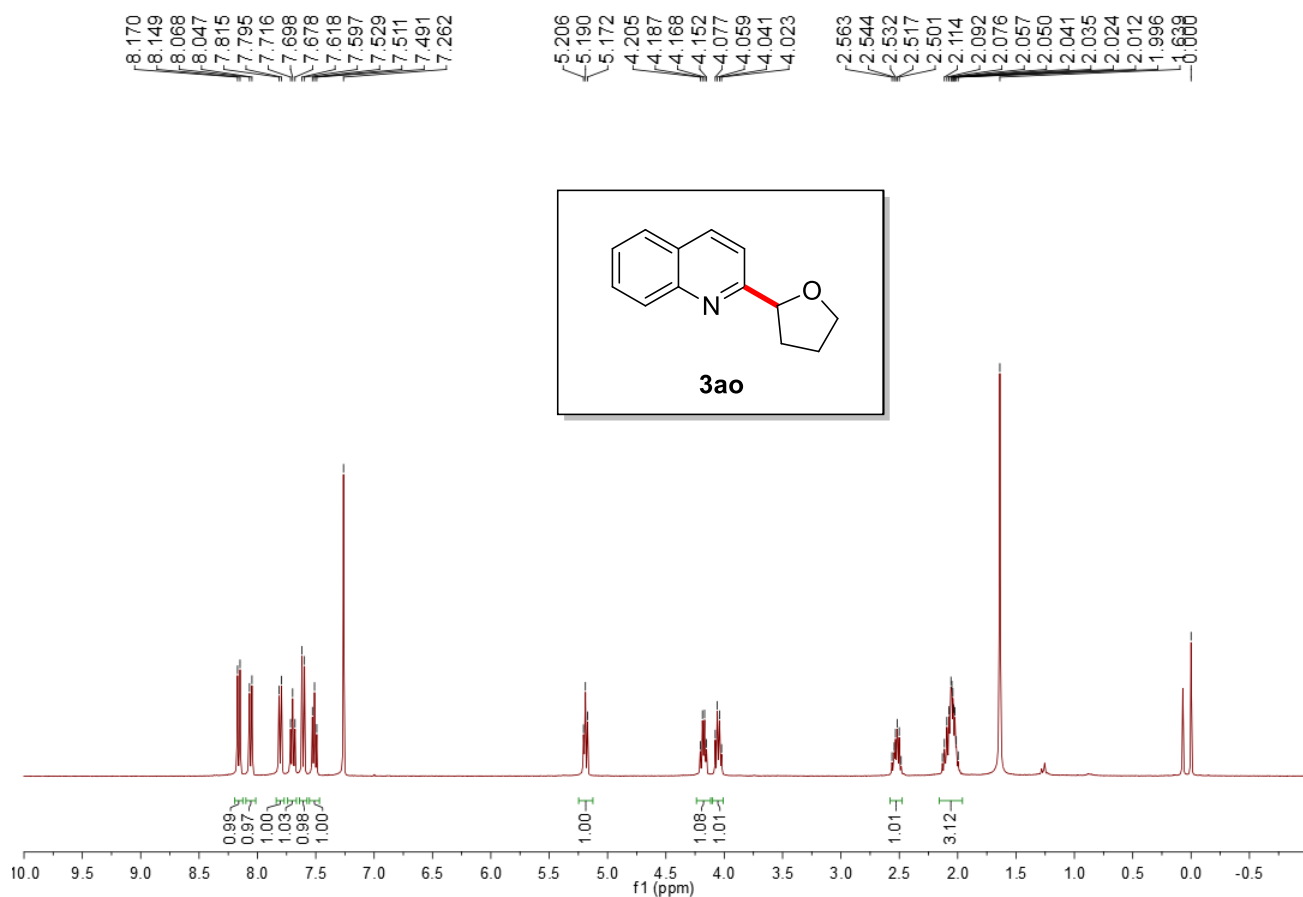

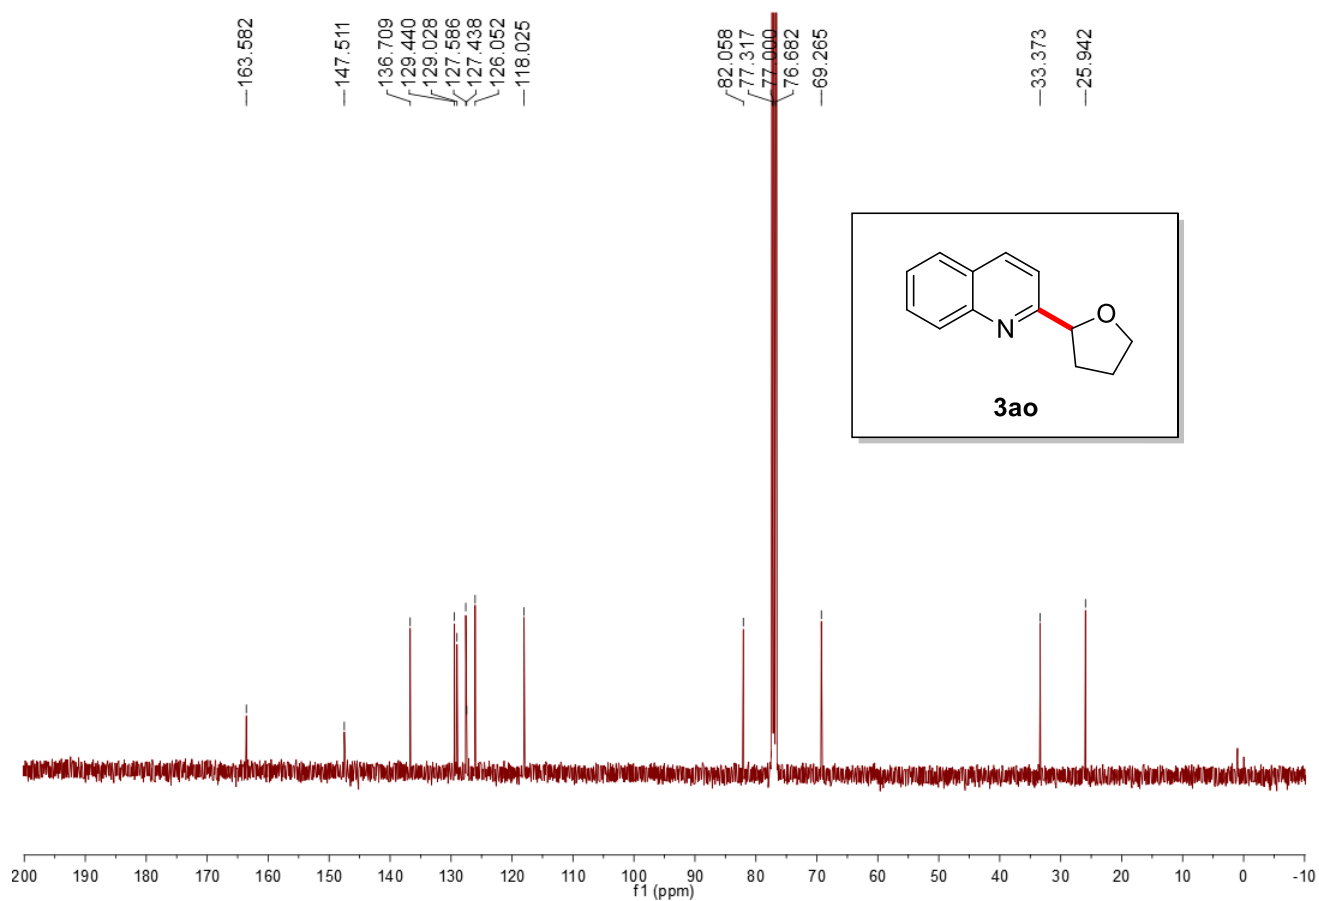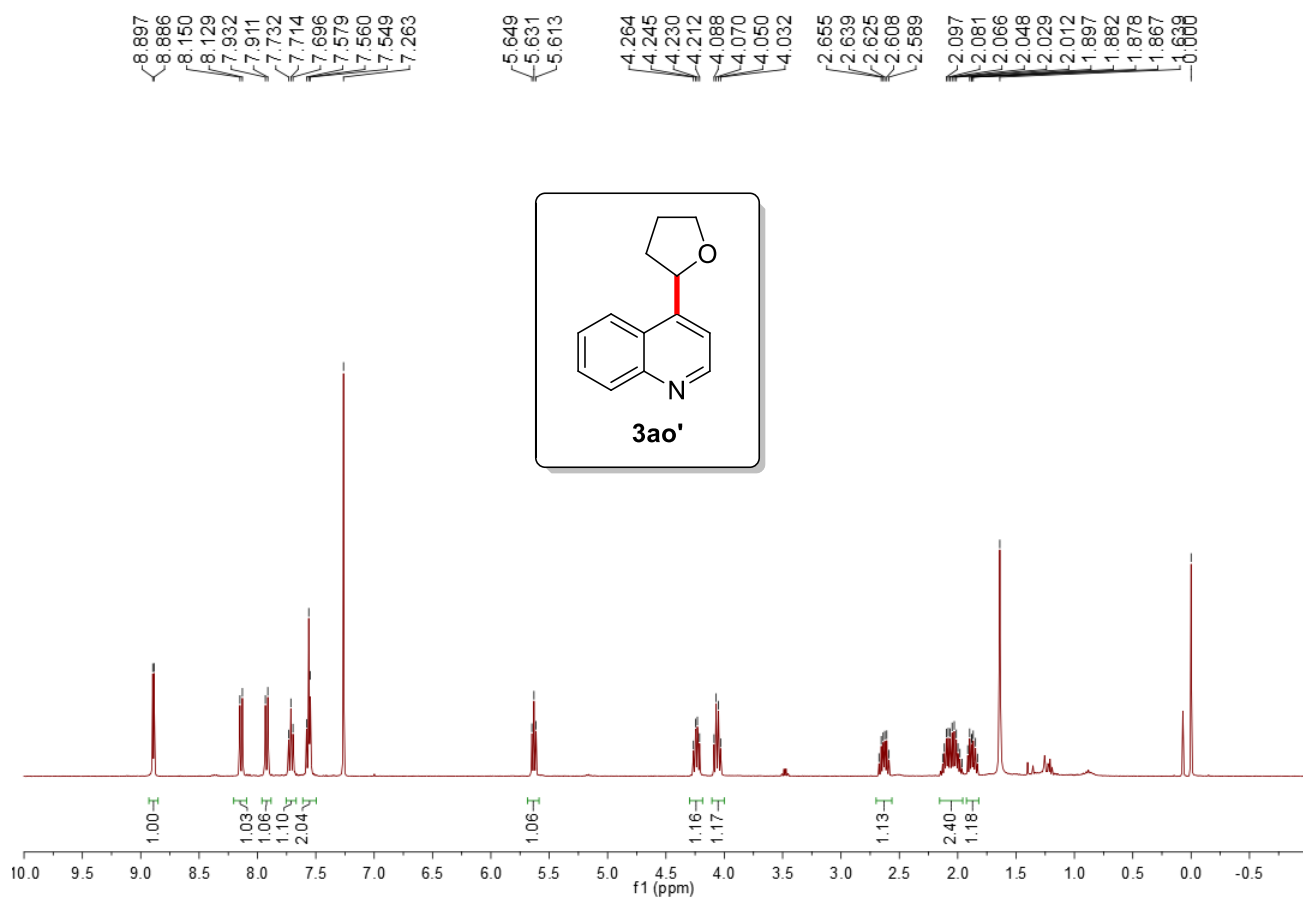

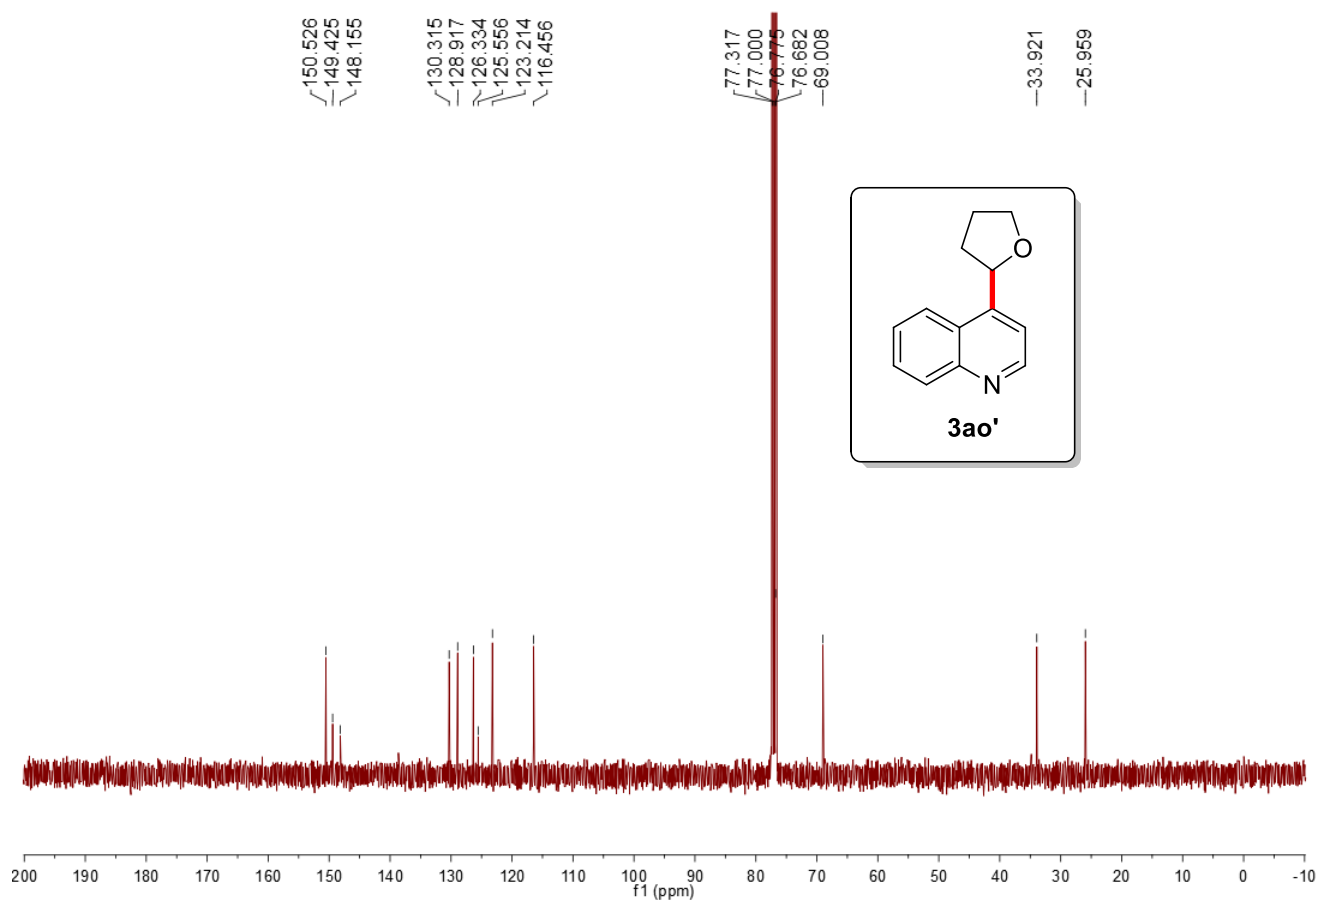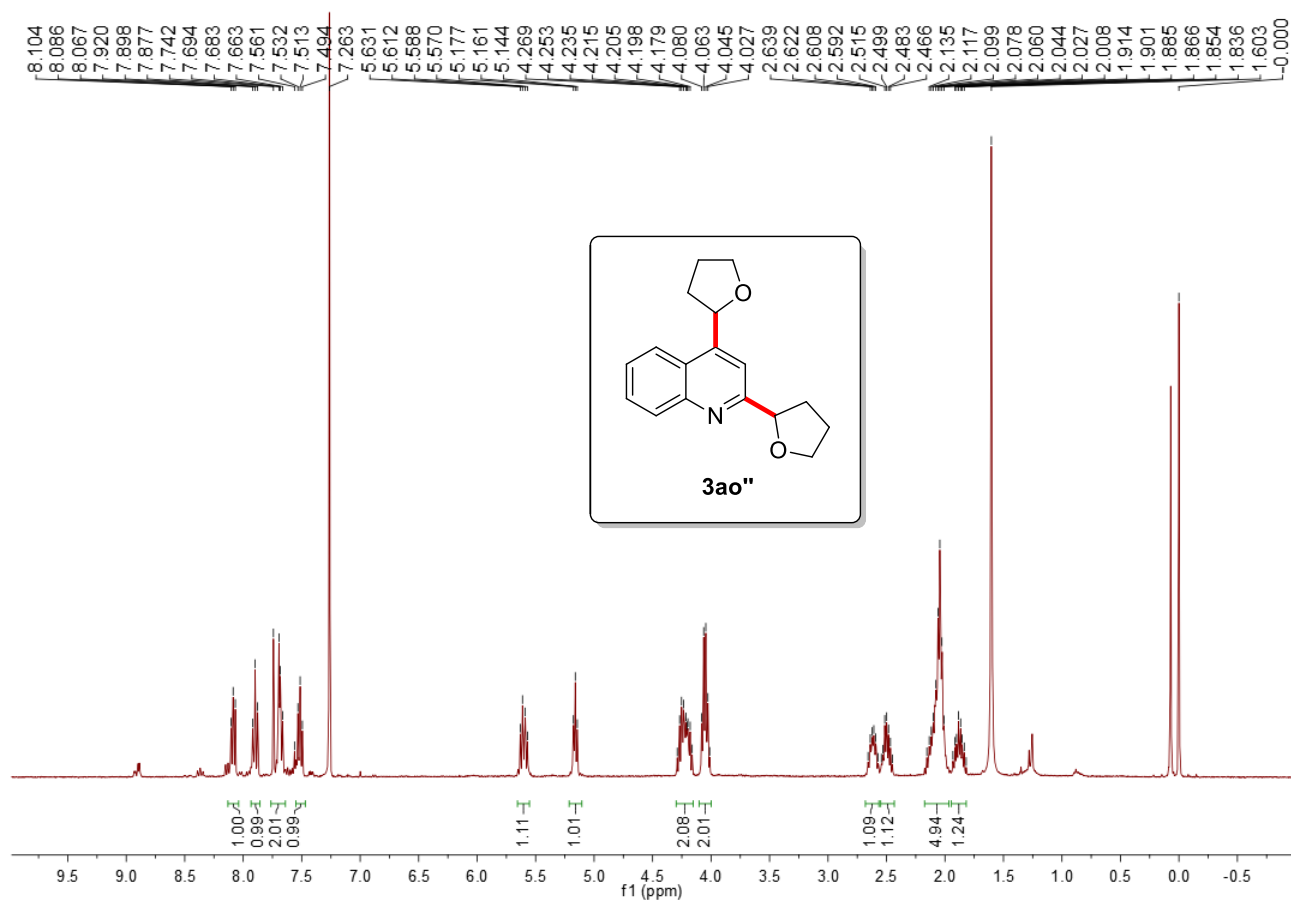

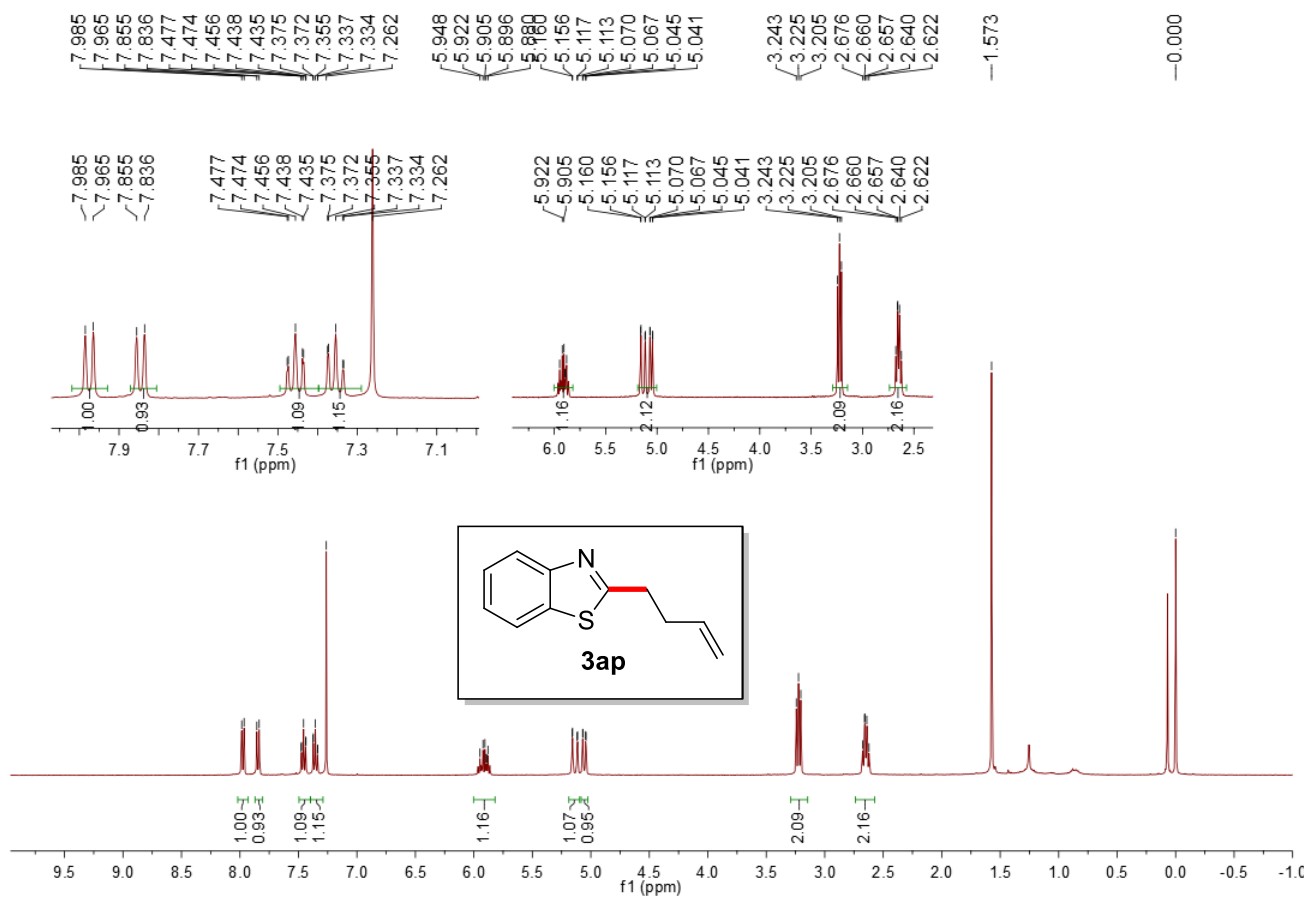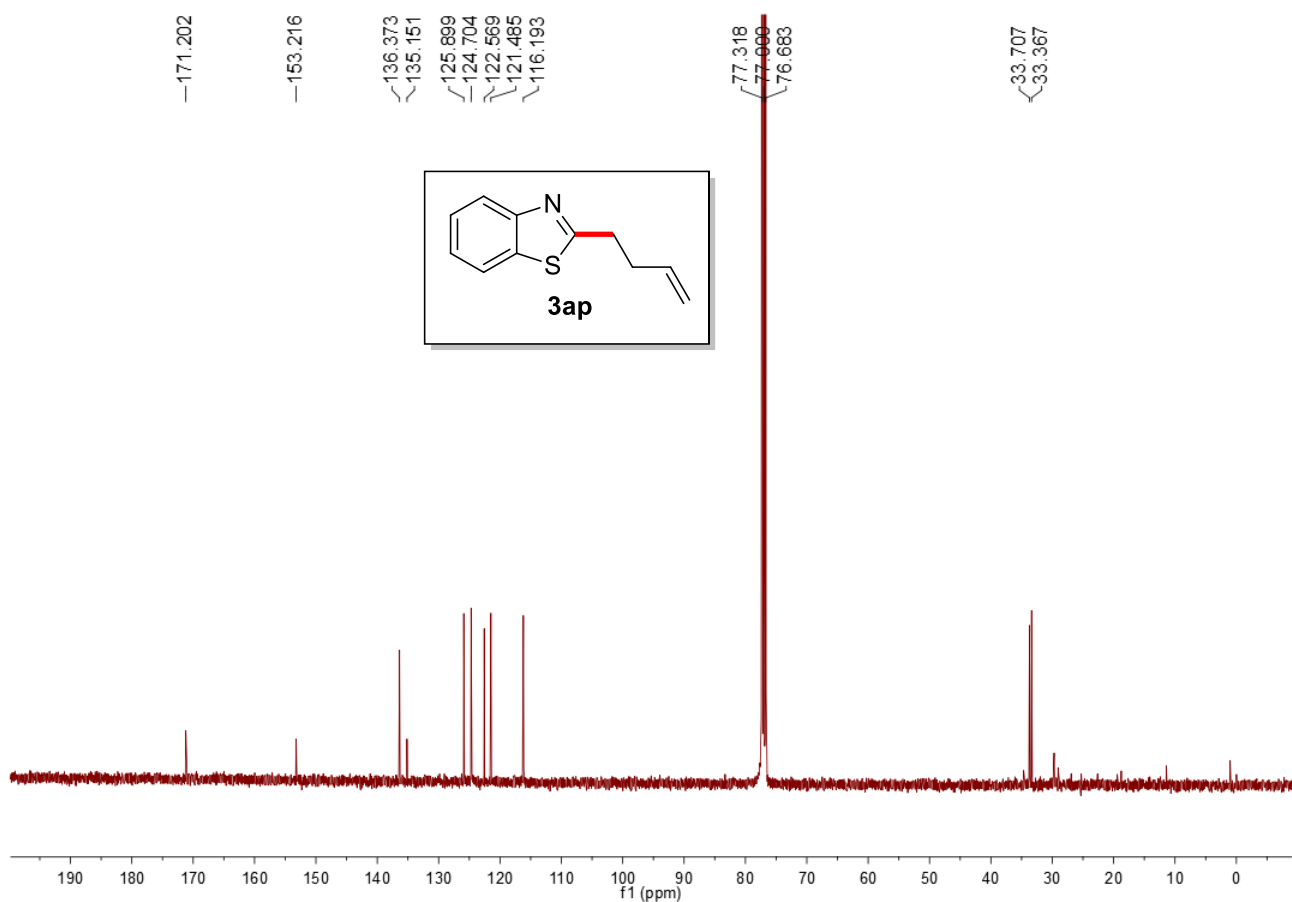

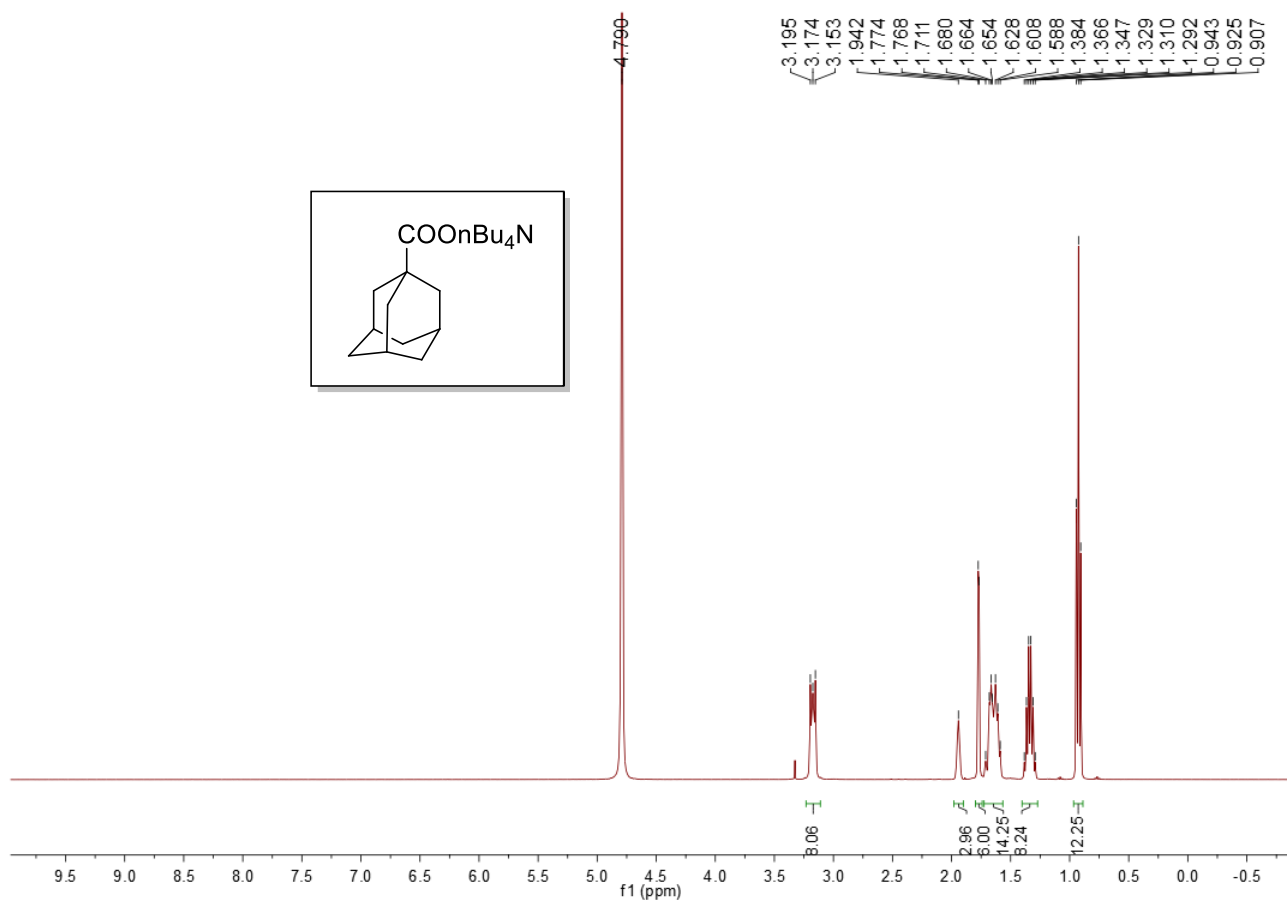

Supplement: Supplementary file 1 [file 17384462]
